# Supplementary material for: Effect of GnRH agonist down-regulation combined with hormone replacement treatment on reproductive outcomes of frozen blastocyst transfer cycles in women of different ages
Source: PeerJ. 2024 May 31;12:e17447. doi: 10.7717/peerj.17447 (PMC11146325; doi:10.7717/peerj.17447)
Supplement: Data S1 [file peerj-12-17447-s001.xlsx]

## Sheet: Sheet1
treatment	down-regulation(0:NO,1:YES）	Art Time	female age（＜35：0，＞35：1）	female age	Male age	BMI	BMI	Duration of infertility(years)	Infertility type（Primary 1,Secondary 0）	PCOS（1:yes;NO:0）	History of intrauterine adhesions（YES:1;NO:0）	AMH	Protocol in fresh cycle（Agonist:1;Antagonist:2;PPOS/LPOI:Others:3、4）	Fertilization type（1.IVF2.ICSI)	pregnancy outcomes	gestational week of labor	neonatal birth weight	Number of embryos transferred
FET	1	2021-11-16 10:00:00	0	20.7	24	20	0	1	0	0	1	4.19	1	1	clinical pregnancy	35	2150/2250	2
FET	0	2021-06-10 14:34:00	0	21.2	31	27.94	2	1	0	0	0	4.62	1	1	Biochemical pregnancy			2
FET	1	2022-05-27 09:35:00	0	21.4	23	24.56	2	4	1	0	0	1.88	3	1/2	unpregnancy			2
FET	0	2021-10-14 14:03:00	0	21.5	31	27.94	2	1	0	0	0	4.62	1	1	unpregnancy			2
FET	0	2021-03-01 08:54:00	0	21.6	30	18.99	0	4	1	0	0		1	2	Biochemical pregnancy			2
FET	0	2022-05-27 10:31:00	0	21.8	24	20.03	0	1	0	0	0	4.42	3	2	clinical pregnancy	41+2	3350	1
FET	0	2020-10-02 11:53:00	0	22.1	25	22.94	0	4	1	0	0	1.46	1	1	clinical pregnancy	37+2	2950/2600	2
FET	0	2021-06-10 09:25:00	0	22.2	27	22.19	0	3	0	0	0	2.78	1	1	Biochemical pregnancy			2
FET	0	2020-07-22 11:30:00	0	22.3	25	19.72	0	2	0	0	0		1	2	clinical pregnancy	39	3100	2
FET	0	2020-06-24 10:53:00	0	22.3	24	25.53	2	3	0	0	0	6.85	1	2	clinical pregnancy	39	3700	1
FET	1	2021-08-13 10:31:00	0	22.4	28	22.19	0	3	0	0	0	2.78	1	1	clinical pregnancy	40	3550	2
FET	0	2021-05-10 11:27:00	0	22.5	25	18.67	0	4	1	0	0	1.87	1	1	clinical pregnancy	39+4	3340	2
FET	0	2021-09-03 10:43:00	0	22.5	25	23.73	0	3	1	0	0	1.52	1	1	clinical pregnancy	40+4	3750	2
FET	1	2022-02-18 08:16:00	0	22.5	30	20.94	0	1	0	0	0		3	2	clinical pregnancy	36	2900/2350	2
FET	0	2021-06-15 10:00:00	0	22.7	24	24.34	2	3	1	0	0	1.9	1	1	clinical pregnancy	40+3	3500/3250	2
FET	0	2021-08-03 14:47:00	0	22.8	32	17.97	1	6	1	0	0	3.85	1	1	unpregnancy			1
FET	1	2021-08-03 09:04:00	0	22.8	27	18.82	0	1	1	0	0	4.06	1	1	unpregnancy			1
FET	0	2021-08-21 10:00:00	0	22.9	29	17.4	1	1	0	0	0		1	1	Biochemical pregnancy			2
FET	0	2022-04-10 09:20:00	0	22.9	30	24.03	2	2	0	0	0		1	1	Biochemical pregnancy			2
FET	1	2021-01-21 10:10:00	0	22.9	30	19.96	0	2	1	0	0		1	1	clinical pregnancy	27	1000	2
FET	0	2021-10-13 08:31:00	0	23	24	21.88	0	2	0	0	0	4.26	1	1	clinical pregnancy	40+5	4150	2
FET	1	2020-12-18 10:36:00	0	23	29	27.83	2	5	0	0	0	3.85	1	2	clinical pregnancy	39	3450	2
FET	0	2021-10-22 14:20:00	0	23.1	32	17.97	1	6	1	0	0	3.85	1	1	clinical pregnancy	33+1	2100/1900	2
FET	0	2021-12-22 10:30:00	0	23.1	25	19.44	0	4	1	0	0	1.69	1	1	unpregnancy			2
FET	0	2021-10-29 11:14:00	0	23.1	30	17.4	1	1	0	0	0		1	1	clinical pregnancy	36+3	2700/2800	2
FET	1	2021-08-25 15:17:00	0	23.1	32	26.04	2	3	1	0	0		4	2	clinical pregnancy			2
FET	1	2020-09-22 11:58:00	0	23.1	26	22.04	0	2	1	0	0	3.35	1	2	clinical pregnancy	40+2	3400	2
FET	1	2022-06-03 13:34:00	0	23.2	27	19.96	0	1	0	0	0	3.04	1	1	unpregnancy			2
FET	0	2020-07-15 14:18:00	0	23.3	25	18.67	0	5	0	0	0	6.43	4	1	clinical pregnancy	40+2	3500	2
FET	0	2020-09-14 13:55:00	0	23.3	32	18.66	0	2	0	0	0	2.52	1	1	unpregnancy			1
FET	0	2022-01-05 10:33:00	0	23.4	31	22.58	0	1	1	0	0	2.7	1	2	unpregnancy			1
FET	0	2021-02-04 08:57:00	0	23.4	25	22.04	0	1	1	0	0	3.29	1	1	Biochemical pregnancy			1
FET	0	2021-08-02 11:36:00	0	23.4	26	22.48	0	7	1	0	1	3.51	1	1	Biochemical pregnancy			2
FET	0	2020-07-28 14:56:00	0	23.4	31	19.56	0	3	1	0	0	7.19	1	1	unpregnancy			2
FET	0	2020-08-27 14:08:00	0	23.5	31	19.56	0	3	1	0	0	7.19	1	1	clinical pregnancy	32+3	1400/1700	2
FET	0	2022-05-25 14:18:00	0	23.5	33	17.26	1	7	1	0	0	2.92	1	1	clinical pregnancy	39+4	3350	1
FET	0	2021-06-14 10:26:00	0	23.6	24	26.37	2	2	0	0	0		1	1	clinical pregnancy	36+1	2350	1
FET	0	2020-04-29 11:15:00	0	23.6	30	28	2	1	0	0	0	1.26	1	1	unpregnancy			2
FET	0	2021-10-01 11:19:00	0	23.6	34	14.82	1	2	1	0	0	2.5	1	1	unpregnancy			1
FET	0	2021-01-04 09:51:00	0	23.6	33	18.66	0	2	0	0	0	2.52	1	1	unpregnancy			2
FET	1	2021-10-11 11:21:00	0	23.6	24	15.63	1	3	1	0	0		1	1	clinical pregnancy			2
FET	0	2021-11-08 10:14:00	0	23.7	24	22.86	0	1	1	0	0	7.18	1	1	unpregnancy			2
FET	0	2020-09-21 14:01:00	0	23.7	36	27.89	2	2	0	0	0		1	1	clinical pregnancy			2
FET	0	2021-11-04 14:08:00	0	23.7	34	14.82	1	2	1	0	0	2.5	1	1	clinical pregnancy	37+6	2490	2
FET	0	2020-03-25 10:59:00	0	23.7	34	21.48	0	2	0	0	0		1	1	clinical pregnancy			2
FET	0	2022-03-16 09:44:00	0	23.7	38	20.44	0	6	1	0	0	5.28	1	1	clinical pregnancy	40+3	3300	1
FET	1	2021-08-13 10:40:00	0	23.7	26	21.77	0	1	1	0	0	2.19	1	1	clinical pregnancy			2
FET	0	2021-01-12 10:52:00	0	23.8	26	22.97	0	4	1	0	0	9.35	1	2	unpregnancy			2
FET	0	2021-09-18 08:41:00	0	23.8	27	29.3	2	4	1	0	0		1	1	clinical pregnancy	38+6	3160	2
FET	0	2020-07-30 14:21:00	0	23.8	29	20.32	0	4	0	0	0	4.04	1	1	clinical pregnancy	37+6	2450/3200	2
FET	0	2022-06-14 11:28:00	0	23.8	31	22.58	0	2	1	0	0	2.7	1	2	clinical pregnancy	39+3	3520	2
FET	0	2021-07-16 08:38:00	0	23.8	26	23.63	0	3	0	0	0	4.16	1	1	unpregnancy			2
FET	1	2020-07-20 16:17:00	0	23.8	27	24.3	2	4	1	0	0	2.61	1	1	unpregnancy			2
FET	0	2020-01-07 12:36:00	0	23.9	33	23.11	0	1	0	0	0	12.68	1	2	clinical pregnancy	39+3	3250	2
FET	0	2020-08-10 15:35:00	0	23.9	27	21.48	0	1	0	0	0	7.5	1	1	clinical pregnancy	39+4	3700	2
FET	0	2022-04-22 09:03:00	0	23.9	24	25.71	2	2	0	0	0	2.45	4	2	clinical pregnancy	41+1	3400	1
FET	0	2020-07-17 11:31:00	0	23.9	25	18.92	0	2	0	0	1	4.74	3	1	unpregnancy			2
FET	0	2022-01-14 10:14:00	0	23.9	27	22.48	0	7	1	0	1	3.51	4	1	clinical pregnancy	38	2750/2550	2
FET	1	2020-08-28 14:19:00	0	23.9	24	26.17	2	2	1	0	0	3.24	1	2	clinical pregnancy	41+2	3400	2
FET	1	2022-06-03 10:16:00	0	23.9	29	23.31	0	3	0	0	0		1	1	clinical pregnancy			2
FET	1	2022-03-07 08:58:00	0	23.9	29	23.63	0	7	1	0	0	1.66	4	1	clinical pregnancy	42+2	3800	1
FET	0	2021-03-03 11:07:00	0	24	28	18.59	0	1	0	0	0	2.96	1	1	clinical pregnancy	32+6	1450/1850	2
FET	0	2021-04-07 09:00:00	0	24	26	20.44	0	4	1	0	0	16.82	1	1	unpregnancy			1
FET	0	2021-08-04 09:42:00	0	24	26	23.88	0	3	1	0	0	12.39	1	1	unpregnancy			2
FET	0	2021-04-15 08:47:00	0	24	32	20.83	0	2	0	0	0	12.29	1	1	clinical pregnancy	38+4	3400	2
FET	1	2021-08-31 10:16:00	0	24	26	19.36	0	2	1	0	0	4.02	1	2	clinical pregnancy	38	3600	2
FET	1	2021-06-04 08:38:00	0	24	25	18.22	1	1	0	0	0	7.31	1	1	clinical pregnancy	36	2150	2
FET	1	2022-01-13 09:03:00	0	24	27	20.82	0	2	1	0	1	2.36	1	1	clinical pregnancy	37	2650/2800	2
FET	0	2021-04-11 08:31:00	0	24.1	32	19.92	0	1	0	0	0	3.2	1	1	unpregnancy			2
FET	1	2021-12-26 09:08:00	0	24.1	26	21.26	0	4	0	0	0	4.98	1	1	Biochemical pregnancy			1
FET	0	2021-08-20 14:48:00	0	24.2	28	22.86	0	5	0	0	0	3.02	1	1	unpregnancy			1
FET	0	2021-04-05 08:35:00	0	24.2	35	19.2	0	3	0	0	0	4.59	1	1	clinical pregnancy			2
FET	0	2021-06-20 10:40:00	0	24.2	29	18.08	1	2	1	0	0	1.94	1	1	clinical pregnancy	39+4	3250	2
FET	1	2021-12-02 11:23:00	0	24.2	27	23.63	0	3	0	0	0	4.16	1	1	Biochemical pregnancy			2
FET	1	2021-10-07 09:29:00	0	24.2	27	23.88	0	3	1	0	0	12.39	1	1	clinical pregnancy	39+1	3400	2
FET	1	2022-04-13 09:45:00	0	24.2	24	22.86	0	1	1	0	0	7.18	3	1	Biochemical pregnancy			2
FET	0	2020-08-06 10:44:00	0	24.3	27	18.67	0	1	1	0	0	3.2	1	2	clinical pregnancy	31+5	1600/1800	2
FET	0	2020-04-28 10:05:00	0	24.3	27	23.88	0	3	1	0	0	3.25	1	1	clinical pregnancy	39+5	3710	2
FET	0	2022-04-25 08:56:00	0	24.3	26	19.2	0	1	1	0	0	4.64	4	1	clinical pregnancy			2
FET	0	2021-10-28 10:03:00	0	24.3	28	16.22	1	3	0	0	0		1	2	Biochemical pregnancy			1
FET	0	2021-09-15 11:16:00	0	24.4	27	20.44	0	4	1	0	0	16.82	1	2	clinical pregnancy	41+1	3100	2
FET	0	2021-10-30 09:33:00	0	24.4	33	18.66	0	2	0	0	0	2.52	1	1	unpregnancy			1
FET	0	2021-06-28 10:17:00	0	24.4	35	19.2	0	3	0	0	0	4.59	1	1	unpregnancy			2
FET	0	2019-12-25 13:52:00	0	24.4	30	17.22	1	1	0	0	0	1.31	1	1	clinical pregnancy	40	3100	2
FET	0	2020-10-13 11:12:00	0	24.4	29	19.92	0	2	1	0	0		1	1	clinical pregnancy	40+5	3600	2
FET	0	2020-06-09 11:37:00	0	24.4	23	18.73	0	2	1	0	0	3.54	1	1	unpregnancy			1
FET	0	2022-05-24 14:09:00	0	24.4	24	24.35	2	4	1	0	0	2.32	1	2	clinical pregnancy	38+3	3400	2
FET	1	2021-10-29 11:00:00	0	24.4	31	22.03	0	2	0	0	0	2.49	1	1	clinical pregnancy	37+1	2444/3000	2
FET	1	2020-05-26 15:06:00	0	24.4	31	21.67	0	4	0	0	0		1	2	clinical pregnancy	40+4	3250	1
FET	1	2021-07-06 10:46:00	0	24.4	33	23.51	0	5	0	0	0	1.9	1	1	unpregnancy			1
FET	0	2021-12-27 15:34:00	0	24.5	28	16.22	1	3	0	0	0		1	2	clinical pregnancy	39+1	3050	2
FET	0	2020-06-29 15:48:00	0	24.5	26	17.01	1	3	0	0	0	4.66	1	1	clinical pregnancy			1
FET	0	2020-06-01 11:56:00	0	24.5	25	18.14	1	1	1	0	0	5.05	1	1	clinical pregnancy	39+5	3640	2
FET	0	2020-08-20 16:02:00	0	24.5	24	17.3	1	1	0	0	0	6.83	1	1	clinical pregnancy	34+5	1750/2500	2
FET	0	2022-06-01 14:49:00	0	24.5	24	22.83	0	3	1	0	0	2.27	1	1	clinical pregnancy	39+2	3460	1
FET	0	2021-04-29 10:23:00	0	24.5	29	16.02	1	3	0	0	0	4.36	1	1	clinical pregnancy	37+6	2350/2700	2
FET	0	2022-03-07 10:22:00	0	24.5	27	26.44	2	2	0	0	0	2.82	3	1	clinical pregnancy	37+4	2650/2900	2
FET	1	2021-02-01 08:44:00	0	24.5	26	17.93	1	2	0	0	0		1	1	clinical pregnancy	38	3000/2750	2
FET	0	2020-09-23 13:46:00	0	24.6	26	19.1	0	2	0	0	0	3.08	1	1	clinical pregnancy	37+4	3640/2700	2
FET	0	2021-03-22 15:02:00	0	24.6	29	21.48	0	1	0	0	0		1	1	clinical pregnancy			1
FET	1	2020-06-04 15:01:00	0	24.6	29	21.23	0	3	1	0	0	0.64	4	1	clinical pregnancy	35+1	2550/1850	2
FET	1	2021-09-01 09:55:00	0	24.6	36	19.2	0	3	0	0	0	4.59	1	1	unpregnancy			2
FET	0	2020-05-07 14:44:00	0	24.7	26	25.71	2	4	1	0	0	2.61	4	1	clinical pregnancy	37+6	3100/2500	2
FET	0	2020-04-13 10:47:00	0	24.7	25	18.87	0	1	0	0	0		3	1	clinical pregnancy	39+3	3000	1
FET	0	2022-05-06 09:24:00	0	24.7	25	20.31	0	1	0	0	0	2.77	1	1	clinical pregnancy	41+1	3400	2
FET	0	2021-11-19 13:31:00	0	24.7	27	18.75	0	3	1	0	0	1.52	1	1	clinical pregnancy	37	3080	2
FET	0	2021-05-12 14:34:00	0	24.8	26	20.31	0	2	1	0	0	2.61	1	1	clinical pregnancy	37+4	3500	2
FET	0	2021-06-11 08:37:00	0	24.8	31	20.31	0	4	1	0	0		1	1	clinical pregnancy	39+6	2800	1
FET	0	2020-10-14 11:13:00	0	24.8	31	20.03	0	3	1	0	0		1	1	clinical pregnancy	39+1	3000	1
FET	0	2022-04-29 11:42:00	0	24.8	31	20.57	0	1	0	0	0	2.16	1	1	clinical pregnancy	40+5	3920	2
FET	1	2021-09-30 10:18:00	0	24.8	31	20.55	0	3	0	0	0	0.81	1	1	unpregnancy			1
FET	1	2021-12-09 14:14:00	0	24.8	32	19.92	0	3	0	0	0	3.2	1	1	clinical pregnancy	40+2	4050	2
FET	0	2020-09-24 14:55:00	0	24.9	33	21.36	0	1	0	0	0	2.51	1	1	Biochemical pregnancy			1
FET	0	2021-09-09 08:45:00	0	24.9	32	25.45	2	6	1	0	0	0.8	1	2	clinical pregnancy	39+1	3490	1
FET	0	2021-10-27 09:06:00	0	24.9	30	16.73	1	1	0	0	0	5.27	1	1	unpregnancy			2
FET	1	2021-11-02 09:15:00	0	24.9	28	19.57	0	2	1	0	1	0.61	1	1	clinical pregnancy	40+6	3800	2
FET	1	2022-01-18 08:19:00	0	24.9	30	22.05	0	2	0	0	0	4.48	1	1	Biochemical pregnancy			1
FET	0	2020-04-28 15:07:00	0	25	26	19.92	0	1	0	0	0	5.58	1	2	clinical pregnancy	39+4	3800	2
FET	0	2020-07-16 14:18:00	0	25	29	21.64	0	2	0	0	0	1.72	4	1	clinical pregnancy			1
FET	0	2020-04-02 13:47:00	0	25	28	20	0	5	1	0	1	5.1	1	1	unpregnancy			1
FET	0	2022-01-05 10:16:00	0	25	31	20.55	0	3	0	0	0	0.81	4	1	clinical pregnancy	32+3	1900/1850	2
FET	0	2022-02-25 08:17:00	0	25	30	22.05	0	2	0	0	0	4.48	1	1	clinical pregnancy	40+4	3250	2
FET	1	2021-03-28 09:50:00	0	25	32	24.68	2	3	0	0	0		1	1	clinical pregnancy	33+5	2250	2
FET	0	2020-07-30 15:41:00	0	25.1	28	25.97	2	1	0	0	0	1.41	1	1	clinical pregnancy			1
FET	0	2020-08-04 13:54:00	0	25.1	25	20.03	0	2	1	0	0	2.37	1	2	clinical pregnancy	39+6	3700	1
FET	0	2020-05-03 09:22:00	0	25.1	28	20	0	5	1	0	0	5.1	1	1	Biochemical pregnancy			2
FET	0	2020-05-31 10:30:00	0	25.1	27	25.81	2	1	0	0	0	2.23	1	1	clinical pregnancy	39+1	2650	2
FET	0	2021-04-04 10:54:00	0	25.1	25	26.67	2	1	0	0	0	3.2	1	1	clinical pregnancy	38+2	2750/3000	2
FET	0	2021-07-16 10:38:00	0	25.1	26	21.76	0	4	0	0	0	2.51	1	2	clinical pregnancy	39+1	2650	2
FET	0	2021-11-01 11:10:00	0	25.1	23	19.57	0	1	0	0	0		1	1	clinical pregnancy	41+2	3500	2
FET	0	2021-08-06 11:36:00	0	25.1	24	19.38	0	1	1	0	1	3.78	1	2	clinical pregnancy	39	3000	2
FET	0	2021-09-28 10:32:00	0	25.1	26	22.27	0	2	1	0	0	7.17	1	1	clinical pregnancy			2
FET	0	2021-02-23 10:25:00	0	25.1	26	17.01	1	3	0	0	0	4.6	1	1	clinical pregnancy	41+2	3450	2
FET	0	2022-05-27 09:12:00	0	25.1	29	20.81	0	1	1	0	0	3.08	3	2	clinical pregnancy	39+4	2600	1
FET	0	2021-03-10 14:40:00	0	25.1	24	23.88	0	3	1	0	0	0.64	4	1	unpregnancy			1
FET	0	2022-06-01 10:08:00	0	25.1	25	21.09	0	4	1	0	0	6.59	1	1	unpregnancy			2
FET	1	2022-04-03 11:24:00	0	25.1	27	20.83	0	3	0	0	1	1.15	3	1	unpregnancy			2
FET	1	2021-12-28 09:10:00	0	25.1	30	16.73	1	1	0	0	0	5.27	1	1	clinical pregnancy	35+4	2550	1
FET	1	2022-02-17 10:48:00	0	25.1	28	19.83	0	1	0	0	1	3.99	1	1	unpregnancy			2
FET	0	2021-01-18 10:57:00	0	25.2	32	24.35	2	6	1	0	0		1	1	clinical pregnancy	36+2	3350	1
FET	0	2021-03-18 10:05:00	0	25.2	31	23.19	0	2	1	0	0	4.89	1	1	clinical pregnancy	36	2400/2250	2
FET	0	2021-03-18 10:31:00	0	25.2	25	25.39	2	2	1	0	0	1.61	3	1	Biochemical pregnancy			2
FET	0	2020-03-26 10:21:00	0	25.2	33	26.22	2	2	0	0	0		1	2	clinical pregnancy	39+2	4000	2
FET	0	2020-03-23 10:59:00	0	25.2	24	21.09	0	3	0	0	0	2.39	1	1	Biochemical pregnancy			2
FET	0	2020-11-28 09:03:00	0	25.2	27	27.34	2	5	0	0	0	3.11	1	1	clinical pregnancy	39	2950	2
FET	0	2021-12-02 11:04:00	0	25.2	31	24.77	2	2	1	0	0	3.27	1	1	clinical pregnancy	36+5	2820/2580	2
FET	0	2021-04-14 14:30:00	0	25.2	24	23.88	0	3	1	0	0	0.64	3	1	unpregnancy			2
FET	1	2021-11-11 10:26:00	0	25.2	27	17.1	1	5	1	0	0		1	2	Biochemical pregnancy			2
FET	1	2022-04-21 10:17:00	0	25.2	28	19.53	0	1	0	0	1	3.99	1	1	clinical pregnancy	37+6	2350/2600	2
FET	0	2021-01-22 08:28:00	0	25.3	31	20.2	0	3	1	0	0		1	1	clinical pregnancy	40+4	3900	2
FET	0	2020-03-13 12:06:00	0	25.3	28	15.82	1	1	1	0	0	2.55	1	1	unpregnancy			1
FET	0	2020-07-16 11:14:00	0	25.3	32	22.89	0	5	1	0	0		1	2	clinical pregnancy	38	2700/2800	2
FET	0	2021-03-23 10:16:00	0	25.3	24	21.3	0	1	0	0	0	5.84	1	2	clinical pregnancy	39+4	3190	1
FET	0	2021-07-01 11:20:00	0	25.3	29	23.44	0	1	0	0	1	4.88	1	1	clinical pregnancy			1
FET	0	2021-10-12 09:01:00	0	25.3	26	24.22	2	3	1	0	0	5.24	1	1	clinical pregnancy			2
FET	0	2021-04-26 10:45:00	0	25.3	27	19.17	0	3	1	0	0	0.63	3	1	clinical pregnancy	30+3	1220	1
FET	0	2020-04-28 16:22:00	0	25.3	24	21.09	0	3	0	0	0	2.39	1	1	Biochemical pregnancy			1
FET	0	2021-05-28 09:23:00	0	25.3	26	19.23	0	4	0	0	0	8.92	1	1	clinical pregnancy	40	3975	2
FET	0	2022-06-21 13:56:00	0	25.3	31	21.26	0	4	0	0	0		1	1	clinical pregnancy	38+2	3800	2
FET	1	2020-07-02 15:16:00	0	25.3	28	20	0	5	1	0	1	5.1	1	1	Biochemical pregnancy			2
FET	1	2021-06-23 08:48:00	0	25.3	25	19.53	0	1	0	0	0		1	1	Biochemical pregnancy			2
FET	1	2022-03-31 08:16:00	0	25.3	28	31.59	2	1	0	0	0	1.44	1	1	clinical pregnancy			2
FET	0	2020-04-24 10:45:00	0	25.4	28	17.04	1	1	0	0	0	3.79	3	2	clinical pregnancy	39+6	3400	2
FET	0	2021-02-23 09:30:00	0	25.4	28	22.1	0	1	0	0	1	1.55	3	1	clinical pregnancy	40+2	3400	1
FET	0	2021-05-20 11:54:00	0	25.4	26	23.05	0	3	0	0	0		1	2	clinical pregnancy	39+3	4000	1
FET	0	2021-08-19 09:35:00	0	25.4	27	20.76	0	2	0	0	0	2.03	1	1	unpregnancy			2
FET	0	2020-06-19 11:37:00	0	25.4	29	21.23	0	6	1	0	0		1	1	clinical pregnancy	39+3	4100	2
FET	0	2021-08-10 10:11:00	0	25.4	27	22.27	0	1	0	0	0	1.96	1	1	clinical pregnancy			1
FET	0	2020-08-04 15:25:00	0	25.4	28	20	0	5	1	0	1	5.1	1	1	clinical pregnancy			2
FET	1	2020-01-07 09:52:00	0	25.4	29	18.9	0	2	0	0	1	4.05	1	1	unpregnancy			2
FET	0	2020-09-15 15:00:00	0	25.5	26	24.22	2	3	1	0	0	1.93	4	1	Biochemical pregnancy			2
FET	0	2021-05-25 14:28:00	0	25.5	27	19.15	0	2	1	0	0	4.2	1	1	unpregnancy			2
FET	0	2020-06-11 11:07:00	0	25.5	35	20.03	0	6	1	0	0	1.61	1	1	unpregnancy			2
FET	0	2021-02-26 08:08:00	0	25.5	26	23.03	0	1	1	0	0	11.87	4	2	clinical pregnancy	41	3550	1
FET	0	2021-05-21 13:51:00	0	25.5	28	19.92	0	4	1	0	0	3.16	1	1	Biochemical pregnancy			2
FET	0	2021-12-17 11:03:00	0	25.5	37	25.15	2	5	0	0	0	3.34	1	1	unpregnancy			2
FET	0	2021-05-18 09:10:00	0	25.5	29	24.53	2	1	0	0	0	2.74	1	2	clinical pregnancy	38+5	4113	1
FET	1	2020-05-07 11:24:00	0	25.5	28	15.82	1	1	1	0	0	2.55	1	1	Biochemical pregnancy			2
FET	1	2022-04-26 09:57:00	0	25.5	30	24.03	2	2	0	0	0		1	2	clinical pregnancy			2
FET	0	2020-05-08 15:19:00	0	25.6	28	16.02	1	2	0	0	0		1	1	clinical pregnancy	39+1	3250	2
FET	0	2021-11-24 09:41:00	0	25.6	25	21.78	0	3	1	0	0		1	1	clinical pregnancy	33+6	2180	2
FET	0	2020-07-03 11:17:00	0	25.6	28	19.81	0	2	1	0	0	5.29	1	1	clinical pregnancy	41+3	3500	2
FET	0	2020-10-08 11:15:00	0	25.6	25	19.43	0	3	0	0	0		1	2	clinical pregnancy	37+2	2550/2950	2
FET	0	2020-05-07 14:34:00	0	25.6	30	20.2	0	2	1	0	0		1	1	clinical pregnancy	39+1	3000	1
FET	0	2022-01-20 11:04:00	0	25.6	38	17.99	1	3	1	0	0	1.54	1	1	unpregnancy			1
FET	0	2022-04-11 10:43:00	0	25.6	33	24.69	2	3	0	0	0		1	1	clinical pregnancy	33+2	3000/3000	2
FET	0	2021-09-28 10:18:00	0	25.7	26	25.39	2	2	1	0	0	1.61	1	1	clinical pregnancy			2
FET	0	2021-07-23 10:50:00	0	25.7	27	19.15	0	2	1	0	0	4.2	1	1	clinical pregnancy	40+5	3350	2
FET	0	2022-05-11 10:27:00	0	25.7	28	18.65	0	1	0	0	0	3.25	1	1	clinical pregnancy	40	3740	1
FET	0	2022-01-14 09:22:00	0	25.7	29	19.11	0	3	1	0	0	7.14	1	1	clinical pregnancy	36+5	2550/4800	2
FET	0	2022-03-18 11:18:00	0	25.7	38	17.99	1	3	1	0	0	1.54	1	1	clinical pregnancy	37+4	2520/2130	2
FET	0	2020-07-02 14:04:00	0	25.7	31	26.67	2	5	0	0	0	1.69	1	1	clinical pregnancy	40+2	4200	2
FET	0	2021-03-02 10:56:00	0	25.7	28	23.59	0	6	0	0	1	5.85	1	1	unpregnancy			2
FET	0	2021-02-03 09:37:00	0	25.8	28	20.43	0	3	0	0	0		1	2	clinical pregnancy			1
FET	0	2020-04-23 14:49:00	0	25.8	29	21.08	0	7	0	0	0		1	1	unpregnancy			2
FET	0	2021-06-02 10:07:00	0	25.8	30	26.44	2	3	0	0	0	5.5	1	1	clinical pregnancy	38+2	3000	2
FET	0	2021-05-14 11:13:00	0	25.8	31	26.44	2	4	0	0	0	1.78	1	1	clinical pregnancy	37+5	3200	2
FET	0	2020-10-08 11:08:00	0	25.8	24	21.09	0	3	0	0	0	2.39	1	1	clinical pregnancy	34+5	2400/2200	2
FET	0	2020-06-30 14:25:00	0	25.8	28	23.15	0	3	0	0	0	3.23	1	1	clinical pregnancy	38+2	3150	2
FET	0	2021-08-02 09:10:00	0	25.8	32	26.17	2	3	1	0	0		4	1	clinical pregnancy	39+2	3800	2
FET	0	2021-10-14 09:23:00	0	25.8	29	18.49	1	3	1	0	0	3.06	1	1	clinical pregnancy	36+4	2200	1
FET	0	2022-06-03 14:21:00	0	25.8	25	22.58	0	2	1	0	0	1.04	1	1	clinical pregnancy	37+2	2850	1
FET	0	2021-10-11 14:41:00	0	25.8	27	18.37	1	1	0	0	0	7.86	1	1	clinical pregnancy	37+2	3000	1
FET	1	2021-08-24 10:46:00	0	25.8	29	19.92	0	4	1	0	0	3.16	1	1	Biochemical pregnancy			2
FET	0	2020-05-26 11:22:00	0	25.9	30	21.08	0	7	0	0	0		1	1	clinical pregnancy	40+2	4800	2
FET	0	2021-10-12 08:57:00	0	25.9	32	18.82	0	1	0	0	0	3.6	1	1	unpregnancy			2
FET	0	2022-05-16 08:21:00	0	25.9	33	22.89	0	1	0	0	0		1	1	clinical pregnancy	40+3	4000	2
FET	0	2021-01-23 11:26:00	0	25.9	31	23.23	0	2	0	0	0	2.91	1	1	Biochemical pregnancy			1
FET	0	2020-03-30 14:25:00	0	25.9	25	20.96	0	1	0	0	0	1.21	4	1	Biochemical pregnancy			2
FET	0	2020-10-12 14:18:00	0	25.9	26	25.39	2	2	1	0	0	4.1	1	1	unpregnancy			2
FET	0	2021-10-07 11:39:00	0	25.9	29	24.52	2	8	1	0	0	1.59	1	2	clinical pregnancy	38+5	3300	2
FET	0	2021-05-10 10:52:00	0	25.9	28	23.59	0	6	0	0	1	5.85	1	1	Biochemical pregnancy			2
FET	0	2021-07-30 16:15:00	0	25.9	26	22.03	0	2	1	0	0	3.82	1	1	unpregnancy			1
FET	0	2021-11-12 14:31:00	0	25.9	32	18.82	0	1	0	0	0	3.6	1	1	unpregnancy			2
FET	0	2021-03-18 10:10:00	0	25.9	27	20.28	0	1	1	0	0		1	1	clinical pregnancy	41+1	3800	2
FET	0	2020-06-29 14:12:00	0	25.9	27	23.62	0	1	0	0	0		1	1	Biochemical pregnancy			2
FET	0	2021-04-02 10:28:00	0	25.9	30	18.61	0	2	1	0	0		1	1	clinical pregnancy	39+4	3340	1
FET	0	2020-06-19 10:40:00	0	25.9	26	15.63	1	1	0	0	0		1	1	unpregnancy			1
FET	1	2021-07-09 11:27:00	0	25.9	29	17.16	1	2	1	0	0	2.5	1	1	Biochemical pregnancy			2
FET	1	2021-02-23 08:19:00	0	25.9	28	26.37	2	2	1	0	0	5.59	1	2	unpregnancy			2
FET	0	2020-07-27 14:08:00	0	26	30	22.31	0	1	1	0	0	2.86	1	1	clinical pregnancy	38+3	3100	2
FET	0	2022-05-27 14:40:00	0	26	29	24.39	2	2	1	0	0	1.64	4	1	unpregnancy			2
FET	0	2022-03-01 09:03:00	0	26	28	22.27	0	1	0	0	0	1.96	1	1	unpregnancy			2
FET	0	2020-02-24 08:44:00	0	26	30	23.44	0	1	1	0	0	4.24	1	2	clinical pregnancy			1
FET	0	2020-03-18 10:19:00	0	26	26	18.73	0	2	0	0	0		1	1	clinical pregnancy	39	2850	2
FET	1	2021-09-01 14:21:00	0	26	25	17.53	1	1	1	0	0	2.19	1	1	unpregnancy			1
FET	1	2020-06-03 11:08:00	0	26	28	18.37	1	2	1	0	0	3.94	1	1	clinical pregnancy	38+6	3150	2
FET	0	2021-03-10 13:52:00	0	26.1	28	16.8	1	3	1	0	0		1	1	clinical pregnancy	39+2	3350	1
FET	0	2021-08-16 15:35:00	0	26.1	32	23.23	0	3	1	0	0		1	1	clinical pregnancy	37+2	2800/2450	2
FET	0	2021-05-01 08:40:00	0	26.1	28	16.61	1	2	0	0	0		1	1	Biochemical pregnancy			2
FET	0	2020-10-09 15:00:00	0	26.1	28	22.48	0	4	1	0	0	0.59	3	2	clinical pregnancy	41	3400	2
FET	0	2020-09-18 14:49:00	0	26.1	29	19.56	0	3	1	0	0	3.46	1	2	clinical pregnancy	37+4	2700	2
FET	0	2021-12-30 11:17:00	0	26.1	29	22.15	0	2	1	0	0	2.81	1	1	Biochemical pregnancy			1
FET	0	2020-03-30 14:55:00	0	26.1	28	32.79	2	3	1	0	0		1	1	clinical pregnancy			2
FET	0	2022-01-13 09:20:00	0	26.1	31	23.42	0	5	0	0	1	1.28	3	2	Biochemical pregnancy			1
FET	0	2021-07-06 10:17:00	0	26.1	33	20.31	0	1	0	0	0	2.42	1	1	Intrauterine and extrauterine pregnancy			2
FET	0	2021-05-28 08:48:00	0	26.1	30	20.13	0	2	1	0	0	3.09	1	1	Biochemical pregnancy			2
FET	0	2021-05-10 10:41:00	0	26.1	29	20	0	5	0	0	1	5.1	1	1	unpregnancy			2
FET	0	2020-08-20 14:12:00	0	26.1	26	15.63	1	1	0	0	1		1	1	unpregnancy			1
FET	0	2021-09-24 10:44:00	0	26.1	29	26.29	2	1	0	0	0	3.37	1	1	clinical pregnancy	39+1	3900	2
FET	1	2020-08-25 10:44:00	0	26.1	29	22.04	0	5	1	0	0		1	1	clinical pregnancy	41+2	4000	2
FET	1	2020-08-03 14:54:00	0	26.1	29	20.31	0	3	0	0	0	0.27	4	1	unpregnancy			1
FET	1	2022-03-18 11:32:00	0	26.1	32	21.48	0	1	1	0	0	5.08	1	1	clinical pregnancy	40+5	4350	2
FET	1	2021-08-15 09:12:00	0	26.1	27	22.03	0	2	0	0	0	5.01	1	1	Biochemical pregnancy			2
FET	1	2021-11-23 10:22:00	0	26.1	31	24.97	2	2	0	0	1		1	1	clinical pregnancy	34+5	2000/2150	2
FET	1	2020-02-28 09:10:00	0	26.1	30	19.15	0	2	0	0	0	2.86	1	1	Biochemical pregnancy			2
FET	0	2020-06-04 14:00:00	0	26.2	30	19.07	0	2	1	0	0	4.6	1	1	Biochemical pregnancy			2
FET	0	2019-12-30 15:46:00	0	26.2	31	24.46	2	1	1	0	0		1	1	clinical pregnancy	36+3	3050、2100	2
FET	0	2020-09-04 13:47:00	0	26.2	29	20.31	0	3	0	0	0	0.27	4	1	unpregnancy			1
FET	1	2020-03-11 15:26:00	0	26.2	26	23.53	0	3	1	0	0	2.43	1	1	clinical pregnancy	38	2950/2350	2
FET	0	2021-09-13 13:45:00	0	26.3	30	20.81	0	2	0	0	0		1	1	unpregnancy			1
FET	0	2020-07-10 14:58:00	0	26.3	28	21.1	0	2	0	0	0	1.48	3	1	clinical pregnancy			2
FET	0	2020-05-06 10:57:00	0	26.3	30	19.15	0	2	0	0	0	2.86	1	1	clinical pregnancy			2
FET	0	2021-09-09 09:44:00	0	26.3	32	25.15	2	3	1	0	0	3.89	1	2	unpregnancy			2
FET	0	2021-05-04 15:03:00	0	26.3	27	18.75	0	2	0	0	0	4.97	1	1	clinical pregnancy	30+5	1600/1600	2
FET	0	2021-07-23 11:12:00	0	26.3	28	20.43	0	3	0	0	1		1	2	Biochemical pregnancy			1
FET	0	2022-06-07 10:44:00	0	26.3	30	23.44	0	1	0	0	0	4.88	4	1	Biochemical pregnancy			1
FET	0	2021-04-19 09:33:00	0	26.3	36	21.64	0	1	1	0	0		1	2	clinical pregnancy	40+6	3600	1
FET	0	2022-01-03 09:47:00	0	26.3	28	20.5	0	2	0	0	0	1.44	3	1	clinical pregnancy	37+2	2600/2250	2
FET	1	2021-05-01 11:24:00	0	26.3	30	19.14	0	1	0	0	0	5.83	1	1	unpregnancy			1
FET	1	2022-06-14 10:48:00	0	26.3	29	18.44	1	1	1	0	0	1.8	1	1	clinical pregnancy	39+1	3800	1
FET	0	2021-03-16 13:50:00	0	26.4	34	23.83	0	3	0	0	0		1	1	clinical pregnancy			1
FET	0	2021-11-06 11:56:00	0	26.4	30	20.81	0	2	0	0	0		1	1	clinical pregnancy	41+2	3450	2
FET	0	2021-07-18 10:56:00	0	26.4	27	27.47	2	2	1	0	0		1	2	clinical pregnancy	35+2	2200/2300	2
FET	0	2022-06-01 08:36:00	0	26.4	28	17.93	1	7	0	0	0	3.26	1	1	Biochemical pregnancy			2
FET	0	2021-06-01 15:28:00	0	26.4	30	19.14	0	1	0	0	0	5.83	1	1	clinical pregnancy	40+1	2300	2
FET	0	2020-04-04 10:32:00	0	26.4	28	19.43	0	3	1	0	0	6.05	1	1	clinical pregnancy			2
FET	0	2020-07-21 15:03:00	0	26.4	26	21.48	0	2	0	0	0	5.64	1	1	Biochemical pregnancy			2
FET	0	2022-01-17 14:10:00	0	26.4	28	21.64	0	3	0	0	0		4	1	unpregnancy			2
FET	0	2020-04-11 10:58:00	0	26.4	37	21.08	0	3	0	0	0		1	2	clinical pregnancy	40+5	3000	2
FET	0	2022-04-27 13:43:00	0	26.4	29	22.15	0	2	1	0	0	2.81	1	1	clinical pregnancy	38+4	3150	2
FET	0	2020-07-24 11:32:00	0	26.4	30	23.44	0	1	0	0	0	4.24	1	2	clinical pregnancy	40+1	3200	1
FET	0	2022-03-30 13:57:00	0	26.4	29	19.92	0	4	1	0	0	3.16	3	2	clinical pregnancy	39+3	3150	1
FET	1	2019-12-31 10:58:00	0	26.4	26	22.2	0	1	0	0	0	2.61	1	1	clinical pregnancy	41+1	3700	2
FET	1	2022-05-19 09:33:00	0	26.4	32	18.44	1	5	1	0	0		4	1	clinical pregnancy	40+6	3900	2
FET	1	2021-02-10 09:13:00	0	26.4	28	24.14	2	2	1	0	0	3.62	1	2	clinical pregnancy	36+5	2988/2805	2
FET	0	2021-06-13 10:42:00	0	26.5	27	23.44	0	4	1	0	0		1	2	clinical pregnancy			2
FET	0	2020-08-21 15:00:00	0	26.5	26	21.48	0	2	0	0	0	5.64	1	1	clinical pregnancy	40+1	3700	2
FET	0	2022-02-15 09:15:00	0	26.5	28	21.64	0	3	0	0	0		4	1	clinical pregnancy	39+3	3100	1
FET	0	2021-09-23 09:25:00	0	26.5	28	27.47	2	5	1	0	0	4.59	1	1	clinical pregnancy	37+4	3150	2
FET	0	2021-01-19 09:31:00	0	26.5	29	21.08	0	3	1	0	0	1.83	1	2	clinical pregnancy			1
FET	0	2022-05-31 10:22:00	0	26.5	27	18.82	0	3	1	0	0	4.03	1	1	unpregnancy			2
FET	0	2021-11-01 08:15:00	0	26.5	31	20.13	0	2	1	0	0	3.09	1	2	Biochemical pregnancy			2
FET	0	2022-05-19 09:30:00	0	26.5	28	21.55	0	2	0	0	0	2.52	1	1	clinical pregnancy			1
FET	0	2021-04-08 10:10:00	0	26.5	31	19.72	0	3	1	0	0	9.69	1	1	unpregnancy			1
FET	0	2022-02-07 11:48:00	0	26.5	31	16.65	1	4	0	0	0	6.68	1	1	clinical pregnancy	35+6	2400/2550	2
FET	1	2020-01-03 10:27:00	0	26.5	29	26.04	2	4	1	0	0	2.98	1	1	clinical pregnancy	40+1	3750	2
FET	0	2021-01-14 10:35:00	0	26.6	28	21.21	0	1	0	0	0	7.65	1	1	unpregnancy			2
FET	0	2020-04-07 11:29:00	0	26.6	27	24.61	2	4	0	0	0	1.92	4	1	clinical pregnancy	40+1	3250	1
FET	0	2020-04-01 10:29:00	0	26.6	44	16.44	1	5	0	0	0		1	2	unpregnancy			2
FET	0	2020-03-26 14:47:00	0	26.6	31	20.2	0	2	1	0	0	5.7	1	1	clinical pregnancy	39+5	3150	1
FET	0	2021-06-21 09:15:00	0	26.6	30	21.77	0	1	0	0	0	11.88	1	1	Biochemical pregnancy			2
FET	0	2021-06-11 09:31:00	0	26.6	31	19.72	0	3	1	0	0	9.69	1	1	clinical pregnancy	32+1	2030/2080	2
FET	0	2021-02-25 08:29:00	0	26.6	27	15.63	1	2	0	0	1		1	1	clinical pregnancy	38+2	2800	1
FET	0	2021-12-15 09:13:00	0	26.6	30	15.42	1	1	0	0	0	3.65	1	1	clinical pregnancy	40	3340	2
FET	0	2022-03-08 08:34:00	0	26.6	32	28.04	2	1	0	0	0	0.61	1	1	HCGpositive			2
FET	0	2021-12-29 09:36:00	0	26.6	32	25.15	2	3	1	0	0	3.89	1	2	unpregnancy			2
FET	0	2021-07-20 10:06:00	0	26.6	37	25.39	2	3	1	0	0	1.62	1	1	clinical pregnancy	39+4	3450	1
FET	1	2021-06-07 14:36:00	0	26.6	28	17.07	1	3	0	0	0	8.45	4	1	clinical pregnancy	40+5	3000	2
FET	1	2021-03-11 09:55:00	0	26.6	31	17.04	1	1	0	0	1	3.8	1	1	clinical pregnancy	36+6	2400/2450	2
FET	1	2021-07-04 09:38:00	0	26.6	32	20.44	0	5	0	0	0	2.21	1	1	clinical pregnancy	39+2	2500	1
FET	0	2021-07-01 14:36:00	0	26.7	28	23.05	0	4	0	0	0		1	1	clinical pregnancy	37+3	2800/2850	2
FET	0	2020-06-04 14:46:00	0	26.7	28	17.63	1	3	0	0	0		1	1	unpregnancy			2
FET	0	2021-09-27 10:04:00	0	26.7	29	27.82	2	1	0	0	0	2.07	1	1	unpregnancy			2
FET	0	2021-10-22 14:24:00	0	26.7	26	20.06	0	2	0	0	1	5.82	1	1	clinical pregnancy	35+1	2100/2360	2
FET	0	2020-09-22 11:43:00	0	26.7	31	24.34	2	5	0	0	0	3.88	1	1	clinical pregnancy	34+1	2350/2450	2
FET	0	2021-08-13 09:00:00	0	26.7	30	20.83	0	2	0	0	0		1	1	Biochemical pregnancy			2
FET	0	2021-07-12 10:25:00	0	26.7	27	20.55	0	10	1	0	0		1	2	Biochemical pregnancy			2
FET	0	2020-04-14 10:51:00	0	26.7	28	20.7	0	2	0	0	0	3.6	1	1	Biochemical pregnancy			2
FET	0	2021-07-05 15:20:00	0	26.7	29	22.22	0	3	0	0	0		4	1	unpregnancy			1
FET	0	2021-03-29 15:14:00	0	26.7	31	17.99	1	2	1	0	0	7.46	1	1	clinical pregnancy	37+2	2600/2400	2
FET	0	2022-04-13 10:34:00	0	26.7	31	20.31	0	2	0	0	1	7.85	1	1	clinical pregnancy	39+2	2950	2
FET	0	2022-02-23 10:17:00	0	26.7	29	23.59	0	6	0	0	1	5.85	1	1	unpregnancy			2
FET	0	2022-05-10 09:21:00	0	26.7	29	19.81	0	4	1	0	0	1.62	1	1	clinical pregnancy	39	3970	1
FET	0	2021-12-24 12:01:00	0	26.7	29	18.83	0	4	1	0	0	4.69	1	1	clinical pregnancy	38+4	3140	2
FET	1	2022-01-14 15:18:00	0	26.7	26	21.47	0	2	1	0	0	5.87	1	2	clinical pregnancy	40+6	3500	1
FET	1	2021-12-23 11:30:00	0	26.7	27	20.45	0	1	0	0	1		1	1	clinical pregnancy	39+4	3425	2
FET	0	2020-07-13 16:04:00	0	26.8	32	19.83	0	2	1	0	0		1	1	clinical pregnancy	40+2	3400	1
FET	0	2021-06-01 11:32:00	0	26.8	31	18.9	0	2	0	0	1	4.05	1	1	unpregnancy			2
FET	0	2021-06-21 10:31:00	0	26.8	28	26.91	2	3	1	0	0	3.85	1	1	clinical pregnancy	32+5	1800	2
FET	0	2020-10-08 10:40:00	0	26.8	31	21.48	0	4	1	0	1	2.23	1	1	unpregnancy			2
FET	0	2020-07-15 15:55:00	0	26.8	28	18.2	1	1	0	0	0	1.49	1	1	unpregnancy			1
FET	0	2020-06-02 10:14:00	0	26.8	29	23.44	0	2	0	0	0		1	1	clinical pregnancy	38+5	3450	2
FET	0	2021-07-16 08:43:00	0	26.8	28	19.2	0	5	0	0	0	4.45	1	1	unpregnancy			2
FET	0	2021-09-14 09:33:00	0	26.8	31	21.77	0	1	0	0	0	11.88	1	1	unpregnancy			2
FET	0	2021-09-21 08:19:00	0	26.8	32	25.71	2	3	0	0	0	2.33	4	1	clinical pregnancy	40	3700	2
FET	0	2020-07-08 14:10:00	0	26.8	28	17.63	1	3	0	0	0		1	1	clinical pregnancy	41	3800	2
FET	0	2022-01-30 09:26:00	0	26.8	31	17.58	1	1	1	0	0	2.54	1	1	unpregnancy			2
FET	0	2020-01-07 12:05:00	0	26.8	28	22.68	0	1	0	0	0	1.28	1	1	clinical pregnancy	40+1	3350	2
FET	0	2021-07-11 08:21:00	0	26.8	30	29.62	2	3	1	0	0		1	1	clinical pregnancy	37+1	2840/2910	2
FET	0	2022-02-25 08:55:00	0	26.8	25	21.64	0	1	0	0	0		1	1	unpregnancy			2
FET	1	2021-08-03 08:45:00	0	26.8	32	27.55	2	5	0	0	0	3.36	1	1	Biochemical pregnancy			2
FET	1	2021-11-25 08:48:00	0	26.8	28	20.66	0	3	1	0	0	3.32	1	1	clinical pregnancy	39+2	3820	2
FET	1	2020-08-14 15:11:00	0	26.8	28	22.04	0	4	1	0	0	2.96	1	1	clinical pregnancy	40+6	3750	2
FET	0	2020-11-13 11:26:00	0	26.9	28	23.23	0	1	0	0	0	2.01	1	1	unpregnancy			2
FET	0	2020-07-30 14:11:00	0	26.9	32	19.84	0	2	1	0	0	2.3	1	1	Biochemical pregnancy			2
FET	0	2020-06-12 10:28:00	0	26.9	29	24.65	2	3	1	0	0	1.32	4	1	clinical pregnancy	34+6	2100/1750	2
FET	0	2022-06-05 09:56:00	0	26.9	31	22.89	0	2	1	0	0	5.14	4	1	clinical pregnancy			1
FET	0	2021-02-04 11:19:00	0	26.9	34	16.77	1	3	0	0	0		1	1	Biochemical pregnancy			2
FET	0	2022-05-18 10:28:00	0	26.9	28	20.57	0	3	1	0	0	1.44	1	1	clinical pregnancy	41+2	3550	2
FET	0	2022-05-29 10:38:00	0	26.9	34	20.81	0	2	0	0	0		1	1	clinical pregnancy	39	3300	1
FET	0	2020-01-02 15:19:00	0	26.9	31	24.03	2	3	0	0	0	3.19	1	1	unpregnancy			1
FET	0	2020-06-26 09:47:00	0	26.9	29	20.7	0	2	0	0	0	3.6	1	1	Biochemical pregnancy			2
FET	0	2020-08-11 11:13:00	0	26.9	24	20.55	0	1	0	0	0		1	1	clinical pregnancy	37+5	3050	2
FET	0	2021-09-21 10:49:00	0	26.9	26	25.63	2	1	0	0	0	2.2	1	1	clinical pregnancy	34+2	1900/1600	2
FET	0	2021-10-12 11:31:00	0	26.9	33	17.53	1	2	1	0	0	11.27	1	1	clinical pregnancy	40+1	4250	2
FET	0	2020-09-11 14:03:00	0	26.9	35	19.63	0	1	0	0	0	3.97	1	1	unpregnancy			2
FET	0	2022-03-01 09:27:00	0	26.9	31	17.58	1	1	1	0	0	2.54	1	1	clinical pregnancy	40+3	3175	2
FET	1	2020-08-06 10:49:00	0	26.9	28	19.14	0	1	0	0	1	3.16	1	1	clinical pregnancy	39+6	3600	2
FET	1	2021-08-24 14:11:00	0	26.9	30	20.43	0	2	0	0	0	2.33	1	1	clinical pregnancy	38+4	3501	1
FET	1	2021-08-06 10:13:00	0	26.9	34	24.84	2	5	1	0	0	4.93	1	2	clinical pregnancy	41+1	4150	1
FET	1	2021-12-16 10:10:00	0	26.9	30	19.57	0	1	0	0	0	6.73	1	1	unpregnancy			2
FET	1	2022-05-11 09:32:00	0	26.9	32	22.48	0	2	0	0	0	2.04	1	1	clinical pregnancy	40+1	3890	1
FET	1	2021-02-22 14:38:00	0	26.9	30	24.77	2	1	0	0	0	5.11	1	1	clinical pregnancy	40+6	3550	2
FET	1	2022-03-28 08:58:00	0	26.9	29	22.03	0	1	1	0	0	6.27	1	2	Biochemical pregnancy			2
FET	1	2021-12-06 09:06:00	0	26.9	29	27.82	2	1	0	0	0	2.07	1	1	Biochemical pregnancy			1
FET	0	2020-01-09 13:52:00	0	27	35	18.36	1	6	0	0	0	5.42	1	1	unpregnancy			2
FET	0	2022-01-23 08:41:00	0	27	35	19.91	0	4	1	0	0	7.66	1	1	unpregnancy			2
FET	0	2020-10-09 14:04:00	0	27	29	22.58	0	2	1	0	0	2.1	1	1	clinical pregnancy	38+6	3500	2
FET	0	2021-10-05 14:07:00	0	27	30	25.2	2	1	0	0	0	5.25	1	1	clinical pregnancy			2
FET	0	2021-04-04 08:41:00	0	27	29	21.09	0	1	0	0	0	1.48	1	1	HCGpositive			2
FET	0	2021-05-10 13:57:00	0	27	31	22.43	0	1	0	0	0	2.8	1	1	unpregnancy			1
FET	0	2022-05-29 10:57:00	0	27	28	22.89	0	3	1	0	0	4.7	1	1	unpregnancy			2
FET	0	2021-12-10 10:05:00	0	27	30	21.22	0	3	1	0	1	3.38	1	1	clinical pregnancy			2
FET	0	2021-01-29 09:25:00	0	27	33	24.8	2	3	1	0	0	2.33	1	1	unpregnancy			2
FET	0	2021-07-05 09:45:00	0	27	26	25.39	2	3	1	0	0	6.12	1	1	clinical pregnancy	41+1	3600	2
FET	0	2022-05-08 10:18:00	0	27	36	19.31	0	1	0	0	0	4.81	3	1	unpregnancy			2
FET	0	2021-10-24 10:25:00	0	27	29	22.22	0	3	0	0	0		4	1	clinical pregnancy			2
FET	0	2021-07-26 08:28:00	0	27	28	25.33	2	6	1	0	0	3.87	1	1	clinical pregnancy	37+2	2400/2550	2
FET	0	2021-07-06 11:49:00	0	27	31	22.96	0	1	0	0	0	1.52	1	1	clinical pregnancy	39+2	3230	2
FET	0	2022-05-05 08:51:00	0	27	31	20.03	0	2	0	0	0	3.76	1	2	clinical pregnancy	38+5	2550/3050	2
FET	1	2021-08-12 11:15:00	0	27	29	23.74	0	2	1	0	0	1.67	1	1	clinical pregnancy	41+1	3550	1
FET	1	2020-09-10 14:03:00	0	27	28	18.2	1	1	0	0	0	1.49	1	1	Biochemical pregnancy			2
FET	1	2021-11-15 09:45:00	0	27	31	21.77	0	1	0	0	0	11.88	1	1	clinical pregnancy	32+3	1800/1900	2
FET	1	2021-10-29 11:38:00	0	27	32	24.61	2	3	1	0	0	1.23	1	2	unpregnancy			2
FET	0	2020-09-11 14:17:00	0	27.1	28	22.64	0	2	1	0	0	17.1	1	1	clinical pregnancy	39+4	3750	2
FET	0	2020-03-18 10:24:00	0	27.1	28	18.37	1	2	1	0	0	3.56	1	1	clinical pregnancy	40+2	3580	2
FET	0	2021-07-01 10:05:00	0	27.1	32	21.6	0	1	0	0	0	3.09	1	2	unpregnancy			1
FET	0	2021-07-20 11:11:00	0	27.1	27	19.72	0	1	1	0	0	5.55	4	1	Biochemical pregnancy			2
FET	0	2021-05-03 10:55:00	0	27.1	26	20.7	0	2	0	0	0	5.77	1	1	Biochemical pregnancy			2
FET	0	2021-11-07 10:51:00	0	27.1	29	22.22	0	6	1	0	0		1	1	clinical pregnancy			2
FET	0	2021-12-30 10:41:00	0	27.1	31	34.55	2	1	0	0	0	6.84	3	2	clinical pregnancy			1
FET	0	2020-06-15 14:51:00	0	27.1	28	21.16	0	1	0	0	0		1	1	clinical pregnancy	40	4050	1
FET	0	2022-02-23 10:48:00	0	27.1	35	19.91	0	4	1	0	0	7.66	1	1	clinical pregnancy	29+3	1220	2
FET	0	2021-12-01 08:14:00	0	27.1	32	24.61	2	3	1	0	0	1.23	1	2	unpregnancy			2
FET	1	2021-11-12 10:20:00	0	27.1	28	19.2	0	5	0	0	0	4.45	1	1	unpregnancy			2
FET	1	2022-01-10 09:00:00	0	27.1	33	24.22	2	3	1	0	0		1	1	unpregnancy			2
FET	1	2020-05-07 10:50:00	0	27.1	29	18.97	0	1	0	0	0	2.93	1	1	unpregnancy			2
FET	1	2020-03-09 14:54:00	0	27.1	31	28.04	2	1	1	0	0	3.53	4	1	Biochemical pregnancy			2
FET	0	2021-05-18 09:53:00	0	27.2	27	17.97	1	2	1	0	0	10.75	1/4	2	clinical pregnancy	36+5	3100/3050	2
FET	0	2021-07-08 13:58:00	0	27.2	31	22.43	0	1	0	0	0	2.8	1	1	clinical pregnancy	40+3	2850	2
FET	0	2021-10-04 08:36:00	0	27.2	34	18.73	0	5	0	0	0	1.73	1	1	clinical pregnancy	40	3250	2
FET	0	2020-04-06 10:52:00	0	27.2	31	25.64	2	1	0	0	0	4.04	1	1	Biochemical pregnancy			2
FET	0	2020-04-15 11:09:00	0	27.2	30	23.03	0	4	1	0	0	5.81	1	2	clinical pregnancy			2
FET	0	2021-05-11 10:17:00	0	27.2	26	18.44	1	4	1	0	0	2.18	1	2	Biochemical pregnancy			2
FET	0	2021-03-11 10:29:00	0	27.2	31	21.41	0	5	1	0	0	1.85	3	2	clinical pregnancy	37+6	3950	1
FET	0	2020-06-26 09:13:00	0	27.2	28	19.63	0	4	0	0	0		1	1	clinical pregnancy	39+1	2900	2
FET	0	2021-06-03 10:54:00	0	27.2	29	21.09	0	1	0	0	0	1.48	1	1	clinical pregnancy	39+4	3550	1
FET	0	2021-06-03 08:48:00	0	27.2	28	18.29	1	2	0	0	1		1	1	clinical pregnancy			2
FET	0	2021-06-14 10:55:00	0	27.2	34	16.77	1	3	0	0	0		1	1	ectopic pregnancy			2
FET	0	2021-07-15 11:49:00	0	27.2	29	21.83	0	2	1	0	0	0.62	1	2	clinical pregnancy	40+1	3430	1
FET	0	2022-03-24 08:33:00	0	27.2	24	22.55	0	1	1	0	0	2.26	1	1	clinical pregnancy	40+3	3160	2
FET	0	2021-03-23 11:20:00	0	27.2	33	24.44	2	1	0	0	0	5.18	1	1	clinical pregnancy	36+6	3100/2800	2
FET	0	2022-03-23 08:53:00	0	27.2	31	19.57	0	1	0	0	0	6.73	1	1	unpregnancy			2
FET	1	2021-10-15 09:07:00	0	27.2	28	22.66	0	2	1	0	0	7.03	1	2	unpregnancy			2
FET	1	2022-03-04 12:01:00	0	27.2	37	20.03	0	6	1	0	0	1.61	1	1	clinical pregnancy	33+1	2950	2
FET	1	2022-03-18 14:38:00	0	27.2	37	20.32	0	3	0	0	0	1.17	1	1	clinical pregnancy	36+2	2700/2350	2
FET	1	2021-11-26 11:19:00	0	27.2	33	26.22	2	2	0	0	0	1.37	1	1	Biochemical pregnancy			2
FET	0	2020-03-09 14:05:00	0	27.3	29	23.51	0	1	0	0	0		1	1	Biochemical pregnancy			2
FET	0	2021-07-12 13:55:00	0	27.3	29	24.91	2	5	1	0	0	7.05	1	1	clinical pregnancy	40+5	3940	2
FET	0	2022-04-26 08:17:00	0	27.3	31	19.57	0	2	0	0	0	6.73	1	1	clinical pregnancy	37+5	3150/2400	2
FET	0	2021-02-18 08:40:00	0	27.3	33	16.23	1	3	1	0	0	1.02	4	1	Biochemical pregnancy			1
FET	0	2020-08-18 11:26:00	0	27.3	27	18.82	0	3	1	0	0	6.46	1	2	clinical pregnancy	38+4	3650	2
FET	0	2021-08-19 11:30:00	0	27.3	25	19.14	0	3	0	0	0	1.5	1	1	clinical pregnancy			2
FET	0	2020-03-24 10:46:00	0	27.3	27	16.97	1	1	0	0	0		1	1	unpregnancy			2
FET	0	2021-05-28 10:49:00	0	27.3	27	19.05	0	4	1	0	0	4.31	3	1	unpregnancy			2
FET	0	2021-03-02 10:11:00	0	27.3	28	20.58	0	3	0	0	0	3.35	4	1	clinical pregnancy	38+5	3400	2
FET	0	2022-03-06 10:07:00	0	27.3	27	20.55	0	10	1	0	0		1	2	clinical pregnancy	40+4	3030	2
FET	0	2022-03-21 14:31:00	0	27.3	29	20.7	0	2	1	0	0	2.99	1	2	clinical pregnancy	39+1	3350	1
FET	0	2020-08-28 14:00:00	0	27.3	35	21.83	0	1	0	0	0	3.62	1	2	clinical pregnancy	40	3850	2
FET	1	2020-05-12 11:09:00	0	27.3	31	23.01	0	3	1	0	0	4.07	1	2	clinical pregnancy	39+5	2900	2
FET	1	2020-07-17 11:36:00	0	27.3	31	23.71	0	4	1	0	1	3.16	1	2	clinical pregnancy	32	1400/1600	2
FET	0	2021-12-12 09:20:00	0	27.4	30	18.07	1	3	1	0	0		1	1	clinical pregnancy	40+5	3830	2
FET	0	2021-05-22 09:27:00	0	27.4	33	18.07	1	2	0	0	0		1	1	clinical pregnancy	39+5	3100	1
FET	0	2020-09-25 14:00:00	0	27.4	32	21.45	0	3	1	0	0	5.11	1	1	clinical pregnancy	40+3	4600	1
FET	0	2020-10-12 14:24:00	0	27.4	29	18.73	0	3	1	0	0	3	1	1	unpregnancy			2
FET	0	2020-01-14 09:46:00	0	27.4	28	22.31	0	2	0	0	0	2.74	4	1	Biochemical pregnancy			2
FET	0	2021-03-12 10:35:00	0	27.4	29	21.09	0	2	1	0	0	4.61	1	2	clinical pregnancy			2
FET	0	2021-04-15 09:08:00	0	27.4	30	19.23	0	3	1	0	0	4.43	1	1	clinical pregnancy	37+1	2600/2500	2
FET	0	2021-09-03 11:06:00	0	27.4	26	19.43	0	4	1	0	0	7.89	1	1	unpregnancy			2
FET	0	2022-03-23 09:11:00	0	27.4	35	25.64	2	1	0	0	0	1.42	1/4	1	clinical pregnancy	33+5	1900/1000	2
FET	0	2020-09-04 14:01:00	0	27.4	34	22.43	0	5	0	0	0		1	1	clinical pregnancy	38	3150	2
FET	0	2021-07-29 08:50:00	0	27.4	30	18.36	1	2	0	0	0	4.33	1	1	clinical pregnancy	38+2	3120	2
FET	0	2020-01-13 10:34:00	0	27.4	28	21.33	0	1	1	0	0		1	1	clinical pregnancy	38+3	3150	1
FET	0	2021-04-16 08:39:00	0	27.4	33	16.23	1	3	1	0	0	1.02	4	1	unpregnancy			2
FET	0	2021-10-06 10:30:00	0	27.4	33	18.49	1	2	0	0	0	1.21	1	1	unpregnancy			2
FET	0	2022-01-14 10:46:00	0	27.4	41	18.22	1	4	0	0	0	3.97	1	2	unpregnancy			2
FET	0	2021-11-05 14:01:00	0	27.4	27	25.33	2	1	0	0	0	0.99	3	1	Biochemical pregnancy			2
FET	0	2022-03-16 08:57:00	0	27.4	29	24.24	2	2	1	0	0	1.57	1	1	unpregnancy			2
FET	0	2021-10-05 11:23:00	0	27.4	28	18.31	1	1	0	0	0	7.41	1	1	unpregnancy			2
FET	0	2020-06-17 14:10:00	0	27.4	30	18.82	0	2	0	0	0	5.4	1	1	unpregnancy			1
FET	0	2022-01-10 10:15:00	0	27.4	28	22.66	0	2	1	0	0	2.16	3	2	clinical pregnancy	37+1	2510/2800	2
FET	0	2022-03-04 08:45:00	0	27.4	33	27.34	2	7	0	0	0	0.29	3	1	clinical pregnancy	36+4	2770	2
FET	0	2022-03-08 10:30:00	0	27.4	27	17.69	1	3	1	0	0	10.93	1	2	clinical pregnancy	39+2	3650	1
FET	0	2021-05-24 08:48:00	0	27.4	32	17.31	1	7	0	0	0	3.21	1	1	unpregnancy			1
FET	1	2022-04-08 09:06:00	0	27.4	31	20.83	0	2	0	0	0		1	1	clinical pregnancy	36+6	2720	2
FET	1	2020-05-19 10:47:00	0	27.4	36	18.36	1	6	0	0	0	5.42	1	1	clinical pregnancy	30+4	1660	2
FET	1	2022-02-15 11:07:00	0	27.4	33	27.55	2	5	0	0	0	3.36	1	1	unpregnancy			1
FET	1	2020-07-20 14:37:00	0	27.4	31	18.21	1	2	1	0	0	1.69	1	1	clinical pregnancy			1
FET	1	2020-05-26 10:52:00	0	27.4	27	16.97	1	1	0	0	0		1	1	Biochemical pregnancy			1
FET	1	2022-06-13 08:25:00	0	27.4	34	22.27	0	6	1	0	0	1.52	1	2	unpregnancy			2
FET	1	2020-08-24 14:16:00	0	27.4	29	18.97	0	1	0	0	0	2.93	1	1	unpregnancy			1
FET	0	2021-03-23 11:02:00	0	27.5	31	24.44	2	3	1	0	0		1	1	clinical pregnancy			2
FET	0	2020-11-13 09:31:00	0	27.5	33	29.3	2	9	0	0	0		4	1	clinical pregnancy			1
FET	0	2020-04-06 11:17:00	0	27.5	36	18.82	0	4	0	0	0	8.64	1	1	unpregnancy			2
FET	0	2021-06-23 09:43:00	0	27.5	30	19.11	0	3	1	0	0	6.13	1	1	Biochemical pregnancy			1
FET	0	2022-03-04 14:23:00	0	27.5	31	20.44	0	3	1	0	1	0.81	4	1	Biochemical pregnancy			1
FET	0	2019-12-30 15:36:00	0	27.5	37	22.48	0	1	0	0	0		1	1	clinical pregnancy			1
FET	0	2021-07-18 08:33:00	0	27.5	33	24.8	2	3	1	0	0	2.33	1	1	unpregnancy			2
FET	0	2021-06-08 09:07:00	0	27.5	31	20.03	0	1	0	0	0		1	1	clinical pregnancy	39	3000	1
FET	0	2021-07-30 09:52:00	0	27.5	30	20.81	0	1	0	0	1	8.08	3	2	clinical pregnancy			1
FET	0	2022-02-26 09:04:00	0	27.5	36	29.78	2	6	1	0	0	0.82	3	1	clinical pregnancy	39+4	3100	1
FET	0	2020-04-03 14:41:00	0	27.5	31	23.42	0	2	1	0	0	17.32	4	1	Biochemical pregnancy			2
FET	0	2020-06-30 14:20:00	0	27.5	30	18.36	1	2	1	0	0	8.94	1	1	clinical pregnancy	40+1	3650	2
FET	0	2022-05-31 08:53:00	0	27.5	31	18.49	1	2	1	0	0	2.27	1	1	clinical pregnancy	35+6	2190/2230	2
FET	0	2021-10-03 09:37:00	0	27.5	29	21.23	0	1	0	0	0	3.11	3	2	clinical pregnancy	39+3	2900	1
FET	0	2021-07-26 10:46:00	0	27.5	32	17.31	1	7	0	0	0	3.21	1	1	Biochemical pregnancy			2
FET	0	2022-04-19 11:00:00	0	27.5	28	19.72	0	1	1	0	0	5.03	1	1	clinical pregnancy	38+5	2400	1
FET	1	2021-03-15 11:17:00	0	27.5	27	22.6	0	1	1	0	0	2.4	3	1	clinical pregnancy	39+5	3200	2
FET	1	2021-09-25 11:50:00	0	27.5	27	18.9	0	2	1	0	0	2.55	1	1	unpregnancy			2
FET	1	2021-12-01 09:01:00	0	27.5	32	16.96	1	3	1	0	0	7.72	1	1	Biochemical pregnancy			2
FET	1	2022-06-12 10:57:00	0	27.5	31	22.66	0	1	0	0	0	2.64	1	1	clinical pregnancy	37+6	2500/2600	2
FET	1	2022-01-05 14:51:00	0	27.5	30	21.08	0	3	0	0	0	1.83	1	2	unpregnancy			1
FET	1	2021-07-13 11:21:00	0	27.5	32	25.39	2	5	1	0	0	4.22	1	1	clinical pregnancy	39+2	3550	1
FET	0	2021-07-21 08:52:00	0	27.6	32	15.57	1	5	0	0	0		1	1	Biochemical pregnancy			1
FET	0	2020-08-24 15:11:00	0	27.6	28	21.38	0	2	1	0	0	3.8	1	1	unpregnancy			2
FET	0	2020-04-29 11:18:00	0	27.6	34	22.89	0	2	0	0	0		2	1	clinical pregnancy	38+3	2900	2
FET	0	2022-05-12 08:30:00	0	27.6	33	22.06	0	1	0	0	0	0.55	4	1	unpregnancy			1
FET	0	2021-12-27 15:03:00	0	27.6	43	18.37	1	2	0	0	0		1	1	unpregnancy			1
FET	0	2020-07-13 14:25:00	0	27.6	32	24.56	2	4	1	0	0	4.76	1	1	clinical pregnancy	34+4	1700/2200	2
FET	0	2020-05-07 14:48:00	0	27.6	36	18.82	0	4	0	0	0	8.64	1	1	clinical pregnancy			1
FET	0	2021-10-29 09:40:00	0	27.6	29	22.58	0	2	1	0	0		1	1	unpregnancy			2
FET	0	2021-12-24 09:03:00	0	27.6	34	18.49	1	2	0	0	0	1.21	3	2	clinical pregnancy	42+1	3223	1
FET	0	2022-05-13 10:27:00	0	27.6	32	23.59	0	2	0	0	0		1	1	Biochemical pregnancy			2
FET	0	2020-06-19 11:26:00	0	27.6	30	18.07	1	5	1	0	0	4.75	1	2	clinical pregnancy	38+6	2800	2
FET	0	2021-12-13 10:28:00	0	27.6	29	18.83	0	2	1	0	0	1.67	1	2	clinical pregnancy	39+2	3350	1
FET	0	2020-09-09 14:24:00	0	27.6	31	25.64	2	2	0	0	0	4.04	1	1	clinical pregnancy	28+4	2066/2066	2
FET	0	2021-12-07 10:15:00	0	27.6	32	21.48	0	1	0	0	0	3.61	3	2	unpregnancy			1
FET	0	2022-05-13 09:05:00	0	27.6	33	24.61	2	3	1	0	0	1.23	3	2	clinical pregnancy	37+6	2350	1
FET	0	2021-10-15 08:15:00	0	27.6	23	21.63	0	3	0	0	0		1	1	clinical pregnancy	39+2	3000	2
FET	0	2020-05-13 10:42:00	0	27.6	31	23.42	0	2	1	0	0	17.32	4	1	clinical pregnancy			2
FET	0	2022-06-06 13:48:00	0	27.6	31	19.44	0	3	0	0	0		1	1	unpregnancy			2
FET	0	2022-05-22 09:16:00	0	27.6	33	21.09	0	4	1	0	0	5.6	1	1	clinical pregnancy	36	2500/2550	2
FET	0	2022-04-11 11:34:00	0	27.6	32	20.44	0	3	1	0	1	0.81	4	1	clinical pregnancy	41+3	3800	2
FET	1	2021-07-28 11:07:00	0	27.6	28	17.63	1	1	1	0	0	2.14	1	2	clinical pregnancy	37+4	2900	1
FET	1	2021-12-30 10:24:00	0	27.6	28	18.31	1	1	0	0	0	7.41	1	1	clinical pregnancy	41	3650	2
FET	1	2020-09-23 13:52:00	0	27.6	30	20.9	0	1	0	0	0		1	2	unpregnancy			1
FET	1	2022-03-18 10:21:00	0	27.6	41	18.22	1	4	0	0	1	3.97	1	2	clinical pregnancy	38	3700	2
FET	1	2021-09-06 08:46:00	0	27.6	33	22.49	0	3	1	0	0	0.31	4	1	clinical pregnancy	36+5	2570	1
FET	1	2022-03-13 10:37:00	0	27.6	31	21.08	0	3	0	0	0	1.83	1	2	unpregnancy			1
FET	0	2020-04-17 15:07:00	0	27.7	26	22.31	0	3	0	0	0		1	1	unpregnancy			2
FET	0	2020-04-20 10:27:00	0	27.7	29	20.7	0	1	0	0	0		1	1	clinical pregnancy			2
FET	0	2021-02-26 10:48:00	0	27.7	34	20.4	0	3	0	0	0	1.99	1	1	unpregnancy			2
FET	0	2020-09-21 14:55:00	0	27.7	29	21.38	0	2	1	0	0	3.8	1	1	unpregnancy			2
FET	0	2020-08-25 10:36:00	0	27.7	32	19.15	0	5	1	0	0	2.68	1	2	clinical pregnancy	36	2650/2400	2
FET	0	2020-03-23 10:31:00	0	27.7	28	20.31	0	5	1	0	0	4.72	1	2	clinical pregnancy	36+6	2200/2450	2
FET	0	2020-10-21 10:25:00	0	27.7	31	23.03	0	4	0	0	0	5.81	1	2	clinical pregnancy	38+6	3150	2
FET	0	2021-11-19 12:14:00	0	27.7	30	18.49	1	2	1	0	0	1.31	1/4	1	unpregnancy			2
FET	0	2021-09-21 09:47:00	0	27.7	32	17.31	1	7	0	0	0	3.21	1	1	unpregnancy			2
FET	0	2020-04-18 09:39:00	0	27.7	32	20.43	0	1	1	0	0		1	1	clinical pregnancy			1
FET	0	2021-02-20 08:48:00	0	27.7	29	29.05	2	1	1	0	0	5.57	1	2	clinical pregnancy	40+1	3030	2
FET	0	2021-08-15 09:49:00	0	27.7	33	19.65	0	1	1	0	0	2.39	1	2	unpregnancy			1
FET	0	2021-08-02 09:34:00	0	27.7	30	21.88	0	2	1	0	0	3.86	1	2	clinical pregnancy	37+6	2910/2900	2
FET	0	2021-05-20 10:16:00	0	27.7	31	20.44	0	8	1	0	0	3.71	1	2	unpregnancy			1
FET	0	2021-09-15 09:23:00	0	27.7	33	19.65	0	1	1	0	0	2.39	1	2	clinical pregnancy	37+2	2150/2450	2
FET	0	2021-06-03 08:59:00	0	27.7	36	19.63	0	1	0	0	0	3.97	1	1	unpregnancy			2
FET	0	2020-08-31 15:32:00	0	27.7	33	24.03	2	1	0	0	1		1	1	clinical pregnancy	35	2050/2350	2
FET	0	2021-08-31 10:13:00	0	27.7	31	19.11	0	3	1	0	0	6.13	1	1	clinical pregnancy	39+3	3200	2
FET	0	2022-01-06 09:20:00	0	27.7	32	21.48	0	1	0	0	0	3.61	3	2	unpregnancy			1
FET	0	2022-06-03 12:08:00	0	27.7	31	25.2	2	1	0	0	0	5.25	1	1	clinical pregnancy			2
FET	1	2021-12-23 09:21:00	0	27.7	32	22.03	0	3	0	0	0	1.29	1	1	clinical pregnancy			1
FET	1	2021-08-21 09:29:00	0	27.7	29	20.28	0	1	0	0	1	2.93	3	2	clinical pregnancy	39+5	2950	1
FET	1	2021-12-27 10:27:00	0	27.7	29	22.58	0	2	1	0	0		1	1	unpregnancy			2
FET	1	2021-11-25 16:26:00	0	27.7	27	18.9	0	2	1	0	0	2.55	1	1	clinical pregnancy			2
FET	0	2021-08-11 10:38:00	0	27.8	32	17.85	1	2	1	0	0	6.77	1	1	clinical pregnancy			1
FET	0	2021-04-26 08:57:00	0	27.8	33	16.81	1	3	1	0	0		1	1	Biochemical pregnancy			2
FET	0	2021-09-17 09:11:00	0	27.8	31	17.8	1	6	1	0	0	2.87	1	2	clinical pregnancy	36	2050	1
FET	0	2021-08-25 11:05:00	0	27.8	29	22.48	0	4	1	0	0	2.56	1	1	clinical pregnancy	41+2	3350	2
FET	0	2022-03-08 13:54:00	0	27.8	34	21.64	0	6	1	0	0		1	1	unpregnancy			1
FET	0	2021-07-22 09:58:00	0	27.8	27	19.53	0	3	0	0	0		1	2	clinical pregnancy	39+4	4100	1
FET	0	2020-08-18 11:52:00	0	27.8	35	17.99	1	2	1	0	0	6.76	1	2	clinical pregnancy	40	3250	2
FET	0	2021-06-29 11:09:00	0	27.8	29	21.63	0	6	1	0	0	5.85	1	1	clinical pregnancy			2
FET	0	2020-01-08 14:02:00	0	27.8	30	17.78	1	1	0	0	0		1	2	unpregnancy			1
FET	0	2021-12-01 10:16:00	0	27.8	33	19.13	0	2	0	0	0	3.27	1	1	unpregnancy			2
FET	0	2021-06-21 10:10:00	0	27.8	31	20.44	0	8	1	0	0	3.71	1	2	unpregnancy			1
FET	0	2022-02-07 15:35:00	0	27.8	26	19.43	0	4	1	0	0	7.89	1	1	unpregnancy			2
FET	0	2022-04-28 12:03:00	0	27.8	44	19.57	0	2	0	0	0	1.55	1	1	Biochemical pregnancy			2
FET	0	2021-10-19 09:25:00	0	27.8	29	16.66	1	2	1	0	0	3	1	2	unpregnancy			2
FET	1	2020-02-28 08:28:00	0	27.8	30	20.5	0	4	1	0	0		1	1	clinical pregnancy	36+2	2770	2
FET	1	2022-01-13 10:36:00	0	27.8	36	19.1	0	1	0	0	0		1	2	unpregnancy			2
FET	0	2022-03-14 11:13:00	0	27.9	29	22.58	0	2	1	0	0		1	1	unpregnancy			1
FET	0	2021-01-27 10:49:00	0	27.9	32	18.21	1	2	0	0	0	1.69	1	1	Biochemical pregnancy			1
FET	0	2021-11-12 09:08:00	0	27.9	30	20.32	0	1	1	0	0	4.23	4	2	unpregnancy			2
FET	0	2020-05-22 10:56:00	0	27.9	32	24.46	2	3	0	0	0	2.8	1	2	clinical pregnancy	39+1	3400	2
FET	0	2021-10-21 10:01:00	0	27.9	30	18	1	4	1	0	0	1.04	1	1	clinical pregnancy	37	3050/3000	2
FET	0	2021-11-04 09:53:00	0	27.9	32	22.49	0	2	1	0	0	3.36	1	1	unpregnancy			1
FET	0	2020-01-10 13:43:00	0	27.9	30	22.58	0	2	1	0	0		1	1	clinical pregnancy	37+6	2600/2750	2
FET	0	2020-09-09 14:28:00	0	27.9	31	19.56	0	1	0	0	0	2.76	1	1	clinical pregnancy	40+6	3500	2
FET	0	2021-07-09 14:18:00	0	27.9	30	21.64	0	6	1	0	0	4.94	1	1	clinical pregnancy	37+3	2800/2700	2
FET	0	2020-08-31 13:49:00	0	27.9	31	18.82	0	3	0	0	0		2	1	clinical pregnancy	35+3	2250/2500	2
FET	0	2022-02-28 11:31:00	0	27.9	32	21.48	0	1	0	0	0	3.61	3	2	clinical pregnancy	40+1	3200	1
FET	0	2022-04-22 11:50:00	0	27.9	32	20.31	0	2	1	0	0	1.6	1	2	clinical pregnancy	39+3	3000	1
FET	0	2022-03-08 11:00:00	0	27.9	30	19.95	0	1	0	0	0	1.69	1	1	clinical pregnancy	33+4	2000/2130	2
FET	0	2022-06-02 10:38:00	0	27.9	44	19.57	0	2	0	0	0	1.55	1	1	unpregnancy			1
FET	0	2022-01-04 10:43:00	0	27.9	33	19.13	0	2	0	0	0	3.27	1	1	clinical pregnancy	35+3	2700/2500	2
FET	1	2020-08-14 14:00:00	0	27.9	31	19.92	0	2	1	0	0	2.84	4	1	clinical pregnancy	37+5	2800/1850	2
FET	1	2021-08-28 08:41:00	0	27.9	36	19.63	0	1	0	0	0	3.97	1	1	unpregnancy			2
FET	1	2022-02-10 11:00:00	0	27.9	31	22.41	0	3	1	0	0		1	1	clinical pregnancy			2
FET	1	2020-06-04 14:34:00	0	27.9	33	24.03	2	3	1	0	0	2.09	1	1	clinical pregnancy	36+4	3050	2
FET	1	2022-02-23 09:06:00	0	27.9	32	26.67	2	2	0	0	0	0.59	3	1	Biochemical pregnancy			2
FET	1	2021-04-03 15:56:00	0	27.9	30	20.31	0	5	1	0	0		1/4	2	clinical pregnancy	39+6	3300	2
FET	1	2022-02-10 09:47:00	0	27.9	32	23.83	0	5	1	0	0	1.52	1	2	clinical pregnancy			2
FET	1	2021-06-11 08:50:00	0	27.9	30	30.04	2	3	0	0	0	5.7	1	1	unpregnancy			2
FET	1	2021-12-07 10:01:00	0	27.9	29	21.48	0	2	0	0	0	1	1	2	unpregnancy			1
FET	0	2020-08-20 15:58:00	0	28	28	20.2	0	4	1	0	0		1	1	clinical pregnancy	37+3	3050/2450	2
FET	0	2020-06-05 11:22:00	0	28	31	20.5	0	5	1	0	0	6.49	4	1	clinical pregnancy	37+5	2880	2
FET	0	2020-02-13 08:43:00	0	28	31	18.29	1	3	1	0	0	4.08	4	1	unpregnancy			2
FET	0	2021-01-26 08:43:00	0	28	30	21.37	0	2	0	0	0	6.44	3	2	unpregnancy			1
FET	0	2021-04-09 10:04:00	0	28	30	17.69	1	1	1	0	0	5.07	1	1	unpregnancy			2
FET	0	2021-05-20 14:38:00	0	28	32	18.73	0	3	1	0	0	4.54	1	1	unpregnancy			1
FET	0	2020-07-26 10:18:00	0	28	29	27.55	2	2	1	0	0		1	1	unpregnancy			1
FET	0	2021-08-04 09:59:00	0	28	30	17.9	1	7	0	0	0	2.05	1	2	clinical pregnancy	36+1	2300	1
FET	0	2021-07-22 10:59:00	0	28	32	21.3	0	2	1	0	0	1.38	1	2	clinical pregnancy	40+1	4200	1
FET	0	2022-01-16 10:41:00	0	28	34	24.8	2	3	1	0	0	2.33	1	1	clinical pregnancy			2
FET	0	2021-11-29 08:35:00	0	28	28	20.83	0	2	0	0	0		1	1	unpregnancy			1
FET	0	2021-11-30 08:17:00	0	28	33	28.04	2	1	0	0	0	6.21	1	1	unpregnancy			1
FET	0	2022-01-23 09:26:00	0	28	31	20.81	0	1	0	0	1	8.08	3	2	unpregnancy			1
FET	0	2022-05-27 10:49:00	0	28	27	20.28	0	2	1	0	0	2.43	1	1	clinical pregnancy	40+3	3350	1
FET	0	2022-04-24 09:13:00	0	28	33	18.13	1	3	1	0	0	1.39	1	1	Biochemical pregnancy			2
FET	0	2022-05-15 08:41:00	0	28	30	18.83	0	3	0	0	0	1.08	1	1	clinical pregnancy	39+6	3600	2
FET	1	2021-07-02 09:02:00	0	28	34	20.4	0	3	0	0	0	1.99	1	1	clinical pregnancy	37+4	2444	2
FET	1	2021-08-24 08:52:00	0	28	31	20.44	0	8	1	0	0	3.71	1	2	Biochemical pregnancy			2
FET	1	2022-06-15 08:46:00	0	28	32	16.96	1	3	1	0	0	7.72	1	1	clinical pregnancy			1
FET	1	2020-09-22 11:46:00	0	28	37	16.65	1	2	1	0	0	4.65	3	2	unpregnancy			1
FET	1	2022-03-31 15:56:00	0	28	25	18.36	1	1	0	0	0	2.8	1	1	Biochemical pregnancy			2
FET	1	2021-09-21 11:18:00	0	28	33	22.04	0	5	1	0	0	9	1	1	unpregnancy			2
FET	1	2021-11-11 11:34:00	0	28	33	16.9	1	3	1	0	0	1.58	1	1	clinical pregnancy	39+2	3350	1
FET	0	2021-12-02 11:44:00	0	28.1	32	17.85	1	2	0	0	0	6.77	1	1	clinical pregnancy	40+1	3550	2
FET	0	2021-03-03 14:21:00	0	28.1	29	21.38	0	2	1	0	0	3.8	1	1	clinical pregnancy			1
FET	0	2022-01-15 11:52:00	0	28.1	31	18.2	1	4	1	0	0	4.04	1	1	clinical pregnancy	39+5	3100	1
FET	0	2021-07-07 08:20:00	0	28.1	29	20.4	0	2	0	0	0		1	1	clinical pregnancy	40+1	4050	2
FET	0	2021-11-08 13:55:00	0	28.1	32	17.85	1	2	0	0	0	6.77	1	1	unpregnancy			1
FET	0	2021-07-22 14:15:00	0	28.1	31	19.04	0	3	1	0	0	22.1	1	1	unpregnancy			1
FET	0	2021-04-30 11:31:00	0	28.1	28	19.05	0	4	1	0	0	8.27	1	1	clinical pregnancy	39+6	3200	2
FET	0	2021-05-09 11:00:00	0	28.1	31	21.36	0	3	0	0	0	4.12	1	1	clinical pregnancy	37+4	2700/2850	2
FET	0	2022-01-18 09:22:00	0	28.1	31	21.97	0	5	1	0	0	3.92	1	2	clinical pregnancy	38+1	3100/3000	2
FET	0	2021-01-11 11:31:00	0	28.1	28	18.9	0	1	0	0	0		1	1	clinical pregnancy	38+3	3050/2800	2
FET	0	2021-10-01 08:39:00	0	28.1	37	20.55	0	1	0	0	0	5.75	1	1	unpregnancy			2
FET	0	2020-07-23 11:37:00	0	28.1	29	16.9	1	1	0	0	0	2.93	1	1/2	clinical pregnancy	40	3250	2
FET	0	2021-09-10 10:28:00	0	28.1	34	18.73	0	4	1	0	0	1.93	1	1	clinical pregnancy	40+2	3400	1
FET	0	2020-09-02 14:14:00	0	28.1	33	21.19	0	2	1	0	0	15.5	1	2	clinical pregnancy	38+4	3500	2
FET	0	2021-08-20 10:26:00	0	28.1	30	30.04	2	3	0	0	0	5.7	1	1	clinical pregnancy	39+6	3900	2
FET	0	2021-04-01 08:32:00	0	28.1	27	20.31	0	1	1	0	0	4.11	1	1	clinical pregnancy	40+4	3800	1
FET	0	2021-06-21 14:39:00	0	28.1	34	26.67	2	2	1	0	0		1	1	clinical pregnancy	38+5	3300	2
FET	0	2021-01-20 10:00:00	0	28.1	32	20.83	0	2	0	0	0		1	1	HCGpositive			2
FET	0	2021-03-13 11:10:00	0	28.1	34	18.59	0	5	1	0	0		1	1	Biochemical pregnancy			2
FET	0	2020-07-22 14:29:00	0	28.1	29	17.94	1	5	0	0	0		1	2	unpregnancy			2
FET	0	2021-01-12 10:06:00	0	28.1	33	19.22	0	4	1	0	0		1	1	unpregnancy			2
FET	0	2021-09-10 14:46:00	0	28.1	30	22.91	0	2	1	0	0	1.43	1	1	unpregnancy			2
FET	0	2022-06-21 14:14:00	0	28.1	26	19.43	0	5	1	0	0	7.89	1	1	unpregnancy			1
FET	0	2022-06-05 09:47:00	0	28.1	28	21.1	0	1	0	0	0	4.83	1	1	clinical pregnancy	37+6	2950/3030	2
FET	0	2022-04-26 09:45:00	0	28.1	30	20.55	0	4	1	0	0	1.84	1	1	clinical pregnancy			1
FET	0	2022-02-27 09:59:00	0	28.1	31	20.81	0	1	0	0	1	8.08	3	2	clinical pregnancy	39	3150	1
FET	0	2022-04-12 10:45:00	0	28.1	27	17.09	1	1	0	0	0	2.41	1	1	clinical pregnancy	39+6	3850	2
FET	1	2021-04-02 09:42:00	0	28.1	34	18.29	1	1	0	0	0		1	1	unpregnancy			1
FET	1	2020-10-09 14:40:00	0	28.1	32	20.43	0	1	0	0	0		1	1	clinical pregnancy	39+4	3100	2
FET	0	2020-07-27 15:02:00	0	28.2	30	27.89	2	1	0	0	0	4.36	1	1	clinical pregnancy	39	3400	1
FET	0	2020-01-09 14:02:00	0	28.2	33	23.73	0	1	1	0	0	3.52	1	2	unpregnancy			2
FET	0	2020-05-20 11:20:00	0	28.2	31	16.94	1	2	1	0	0	4.45	1	1	clinical pregnancy	40+3	3750	2
FET	0	2021-05-14 08:51:00	0	28.2	28	21.36	0	1	0	0	0	3.76	1	1	clinical pregnancy	37+5	2600	1
FET	0	2020-03-24 10:42:00	0	28.2	29	19.43	0	1	0	0	0	3.61	4	1	clinical pregnancy	38+4	2830	1
FET	0	2020-08-17 15:12:00	0	28.2	37	22.48	0	1	0	0	0		1	1	Biochemical pregnancy			2
FET	0	2022-06-24 11:24:00	0	28.2	32	22.03	0	1	0	0	0	1.29	1	1	unpregnancy			1
FET	0	2022-05-03 14:07:00	0	28.2	30	22.38	0	2	1	0	0	2.85	1	1	clinical pregnancy	39+5	2834	1
FET	0	2021-11-16 11:55:00	0	28.2	28	20.83	0	1	0	0	0	7.67	1	1	clinical pregnancy	37+1	2550/2500	2
FET	0	2022-02-11 09:07:00	0	28.2	34	16.53	1	1	0	0	0		4	1	clinical pregnancy	37+5	3050	2
FET	0	2022-06-10 08:34:00	0	28.2	33	20.28	0	3	1	0	0	2.73	1	1	clinical pregnancy	35+1	2600/2400	2
FET	0	2022-02-18 10:47:00	0	28.2	28	20.7	0	4	1	0	1	1.56	1	1	clinical pregnancy	40+6	3880	2
FET	0	2022-05-19 10:12:00	0	28.2	28	18.73	0	5	1	0	0	3.48	1	1	clinical pregnancy	38+5	2900	2
FET	0	2022-06-03 10:35:00	0	28.2	29	20.43	0	1	1	0	0	1.38	1	2	clinical pregnancy	34+5	2050	1
FET	0	2020-04-14 10:46:00	0	28.2	29	18.42	1	2	0	0	0	5.18	1	1	clinical pregnancy			2
FET	0	2021-10-25 11:17:00	0	28.2	30	20.31	0	1	0	0	0	5.47	1	1	ectopic pregnancy			2
FET	1	2021-07-09 10:03:00	0	28.2	27	27.11	2	5	1	0	0	4.28	1	1	clinical pregnancy	41	3550	1
FET	1	2021-06-14 10:15:00	0	28.2	30	17.69	1	1	1	0	0	5.07	1	1	Biochemical pregnancy			1
FET	1	2022-01-04 11:07:00	0	28.2	37	19.63	0	1	0	0	0		1	1	unpregnancy			1
FET	1	2021-09-25 08:37:00	0	28.2	31	19.04	0	3	1	0	0	22.1	1	1	clinical pregnancy	32+4	2000	2
FET	0	2020-09-14 14:08:00	0	28.3	35	21.33	0	3	0	0	0		1	2	clinical pregnancy	37+6	2650/3000	1
FET	0	2021-06-11 10:04:00	0	28.3	30	19.56	0	1	1	0	0	5.44	1	1	unpregnancy			2
FET	0	2021-11-10 15:05:00	0	28.3	28	23.34	0	1	0	0	0	1.21	1	2	clinical pregnancy	40+3	3300	2
FET	0	2021-02-01 08:17:00	0	28.3	30	21.49	0	1	1	0	0	4.39	1	1	unpregnancy			2
FET	0	2020-05-05 14:39:00	0	28.3	33	20.96	0	2	0	0	0		1	1	clinical pregnancy	38+3	3300	1
FET	0	2021-02-23 09:40:00	0	28.3	31	21.72	0	4	1	0	0	5.71	1	1	clinical pregnancy	39+6	3730	2
FET	0	2021-11-14 10:27:00	0	28.3	40	19.38	0	2	1	0	0	4.78	1	1	Biochemical pregnancy			2
FET	0	2020-09-03 13:55:00	0	28.3	28	17.58	1	2	0	0	0	2.58	1	1	clinical pregnancy	38+4	3200	2
FET	0	2021-03-04 13:37:00	0	28.3	36	23.62	0	2	0	0	0		1	1	clinical pregnancy	39+4	3450	2
FET	0	2021-09-24 14:16:00	0	28.3	30	24.38	2	3	1	0	0	1.53	1	1	clinical pregnancy	38+6		2
FET	0	2022-01-23 09:09:00	0	28.3	30	19.96	0	2	1	0	0	2.73	1	1	Biochemical pregnancy			2
FET	0	2020-09-15 10:44:00	0	28.3	31	20.2	0	2	0	0	0	1.61	4	2	unpregnancy			1
FET	0	2020-05-10 08:05:00	0	28.3	30	22.89	0	3	1	0	0	4.14	1	2	Biochemical pregnancy			2
FET	0	2021-07-09 08:48:00	0	28.3	31	21.51	0	2	1	0	0	4.53	1	1	clinical pregnancy	40	3630	2
FET	0	2020-01-07 13:38:00	0	28.3	31	24.56	2	5	1	0	1	2.44	1	1	Biochemical pregnancy			2
FET	0	2020-09-21 14:50:00	0	28.3	29	17.94	1	5	0	0	0		1	2	clinical pregnancy	40+3	3354	2
FET	0	2022-06-24 11:42:00	0	28.3	29	20.44	0	7	0	0	1	3.4	3	1	unpregnancy			1
FET	0	2021-05-11 08:15:00	0	28.3	42	24.44	2	9	1	0	0	2.38	1/3	1	clinical pregnancy			2
FET	0	2021-08-19 08:45:00	0	28.3	35	23.07	0	8	1	0	0	3.6	1	1	clinical pregnancy			1
FET	0	2020-05-25 15:24:00	0	28.3	31	24.41	2	3	1	0	0	2.79	1	1	unpregnancy			2
FET	0	2021-06-24 08:38:00	0	28.3	31	20.06	0	4	1	0	0	4.92	1	1	clinical pregnancy	37+4	2500/2600	2
FET	0	2021-12-28 08:53:00	0	28.3	33	27.55	2	4	1	0	0	1.32	1	2	unpregnancy			1
FET	0	2022-01-19 10:53:00	0	28.3	29	21.09	0	1	0	0	0	4.61	1	2	clinical pregnancy	40+5	3000	1
FET	0	2022-05-23 08:45:00	0	28.3	29	20.44	0	7	0	0	1	3.4	3	1	unpregnancy			2
FET	0	2020-07-14 11:54:00	0	28.3	33	20.76	0	6	1	0	0	3.03	1	1	clinical pregnancy	40+4	4000	2
FET	0	2022-03-18 08:18:00	0	28.3	29	20.83	0	2	0	0	0		1	1	unpregnancy			2
FET	0	2022-03-13 14:18:00	0	28.3	28	16.82	1	2	1	0	0	1.81	1	1	clinical pregnancy	40+5	2800	1
FET	1	2020-05-26 11:16:00	0	28.3	36	25.78	2	8	1	0	0	2.81	4	1	Biochemical pregnancy			1
FET	1	2021-09-02 11:43:00	0	28.3	33	19.95	0	1	0	0	0	4.62	1	2	clinical pregnancy	36+5	2800	1
FET	1	2020-01-07 10:03:00	0	28.3	28	19.23	0	2	0	0	0	4.27	1	1	unpregnancy			1
FET	1	2021-01-12 10:20:00	0	28.3	37	16.65	1	2	1	0	0	4.65	3	2	Biochemical pregnancy			1
FET	1	2021-12-08 09:00:00	0	28.3	37	20.55	0	1	0	0	0	5.75	1	1	clinical pregnancy	39+2	2500/2400	2
FET	1	2022-05-13 11:05:00	0	28.3	28	24.97	2	3	1	0	0	0.49	3	1	clinical pregnancy	39+4	3000	1
FET	1	2022-01-10 08:56:00	0	28.3	33	22.04	0	5	1	0	0	9	1	1	clinical pregnancy	36+5	2800/2600	2
FET	1	2021-10-26 09:37:00	0	28.3	30	21.09	0	2	0	0	0	4.61	3	2	unpregnancy			1
FET	0	2022-04-25 09:48:00	0	28.3	33	22.04	0	2	0	0	0		1	2	clinical pregnancy	38+4	3050/3200	2
FET	0	2021-06-10 13:47:00	0	28.4	31	18.82	0	2	0	0	0	5.4	1	1	unpregnancy			2
FET	0	2020-08-21 15:04:00	0	28.4	29	18.14	1	2	1	0	0	8.6	1	1	clinical pregnancy	40+4	3500	1
FET	0	2020-06-26 11:45:00	0	28.4	36	25.78	2	8	1	0	0	2.81	4	1	clinical pregnancy	32+5	2400	2
FET	0	2020-06-10 15:22:00	0	28.4	32	25	2	3	1	0	0		1	1	clinical pregnancy	40+6	3700	1
FET	0	2022-04-22 08:32:00	0	28.4	29	20.83	0	2	0	0	0		1	1	Biochemical pregnancy			2
FET	0	2021-08-20 12:17:00	0	28.4	33	16.23	1	2	1	0	0	2.26	3	1	clinical pregnancy	39	3100	2
FET	0	2020-06-12 14:26:00	0	28.4	30	22.89	0	3	1	0	0	4.14	1	2	clinical pregnancy	39+6	3300	2
FET	0	2020-10-07 11:09:00	0	28.4	29	20.31	0	2	1	0	0		1	1	clinical pregnancy			2
FET	0	2021-06-14 11:31:00	0	28.4	34	18.59	0	5	1	0	0		1	1	clinical pregnancy	38+1	3000	2
FET	0	2020-02-24 09:13:00	0	28.4	27	20.31	0	1	1	0	0	4.22	1	1	unpregnancy			1
FET	0	2021-07-02 10:03:00	0	28.4	30	16.65	1	6	0	0	0	4.69	1	1	unpregnancy			1
FET	0	2021-12-16 11:11:00	0	28.4	40	19.38	0	2	1	0	0	4.78	1	1	clinical pregnancy			2
FET	0	2022-05-27 11:00:00	0	28.4	31	23.15	0	3	1	0	0	2.58	1	1	Biochemical pregnancy			2
FET	0	2021-11-04 08:32:00	0	28.4	26	21.99	0	4	0	0	0	9.61	3	1	clinical pregnancy	35+2	2200/2100	2
FET	0	2022-06-03 11:53:00	0	28.4	35	23.44	0	1	1	0	0	5.25	1	1	unpregnancy			2
FET	0	2022-03-30 08:48:00	0	28.4	30	19.96	0	2	1	0	0	2.73	1	1	clinical pregnancy			2
FET	1	2021-02-24 10:03:00	0	28.4	31	21.45	0	1	0	0	0	1.38	1	1	Biochemical pregnancy			1
FET	1	2021-11-21 08:36:00	0	28.4	34	16.81	1	3	1	0	0		1	1	clinical pregnancy	39+2	3700	2
FET	1	2021-06-16 08:49:00	0	28.4	35	18.75	0	4	1	0	0		1/4	2	Biochemical pregnancy			2
FET	1	2020-07-15 14:07:00	0	28.4	29	23.92	0	4	1	0	0	0.76	1	1	unpregnancy			2
FET	1	2021-07-29 10:36:00	0	28.4	30	18.97	0	1	0	0	1	2.93	1	1	unpregnancy			2
FET	1	2022-02-17 11:01:00	0	28.4	28	17.57	1	2	0	0	0	8.1	1	1	clinical pregnancy			2
FET	1	2022-05-01 08:18:00	0	28.4	31	24.61	2	3	1	0	0		1	1	clinical pregnancy	41	3800	2
FET	1	2020-03-03 14:30:00	0	28.4	29	21.48	0	1	0	0	0		4	1	clinical pregnancy	34+6	2300	2
FET	1	2022-04-01 14:21:00	0	28.4	30	24.46	2	1	0	0	0	3.15	1	1	Biochemical pregnancy			1
FET	0	2021-08-23 15:05:00	0	28.5	33	22.6	0	5	1	0	0	0.02	4	1	unpregnancy			2
FET	0	2021-10-28 10:25:00	0	28.5	28	22.76	0	2	1	0	0	10.5	1	1	unpregnancy			1
FET	0	2020-03-26 10:30:00	0	28.5	28	18.26	1	3	1	0	0	5.66	1	1	clinical pregnancy	38+1	3280	1
FET	0	2020-04-20 14:39:00	0	28.5	34	18.43	1	0	0	0	0		1	1	Biochemical pregnancy			2
FET	0	2021-11-11 13:44:00	0	28.5	32	18.73	0	3	1	0	0	4.54	3	1	clinical pregnancy	40+6	2451	2
FET	0	2021-04-04 10:01:00	0	28.5	30	23.59	0	3	1	0	1	0.44	4	1	clinical pregnancy	37+5	3230	2
FET	0	2020-03-31 15:24:00	0	28.5	33	23.73	0	1	1	0	0	3.52	1	2	clinical pregnancy	39+5	3900	2
FET	0	2020-04-09 15:23:00	0	28.5	34	16.44	1	4	1	0	0		1	1	Biochemical pregnancy			2
FET	0	2020-10-13 10:37:00	0	28.5	34	22.6	0	3	1	0	0	3.67	1	1	clinical pregnancy	34+4	2800	1
FET	0	2021-08-13 10:20:00	0	28.5	30	19.56	0	1	1	0	0	5.44	1	1	unpregnancy			2
FET	0	2021-05-19 15:49:00	0	28.5	30	23.51	0	2	0	0	0		1	1	Biochemical pregnancy			1
FET	0	2020-09-14 15:03:00	0	28.5	33	22.58	0	1	1	0	0	6.02	1	1	clinical pregnancy			2
FET	0	2021-02-19 15:42:00	0	28.5	33	17.48	1	5	1	0	0		1	1	unpregnancy			1
FET	0	2021-12-23 14:07:00	0	28.5	32	20.7	0	1	0	0	0	2.57	1	1	clinical pregnancy			2
FET	0	2022-05-21 09:21:00	0	28.5	33	24.22	2	2	1	0	0	3.36	1	1	clinical pregnancy	38	2500	1
FET	0	2021-06-07 10:42:00	0	28.5	32	20.83	0	2	0	0	0		1	1	clinical pregnancy	38+6	3150	1
FET	0	2022-01-24 11:52:00	0	28.5	34	21.48	0	4	1	0	0	1.06	1	1	HCGpositive			2
FET	0	2022-05-18 11:34:00	0	28.5	34	24.84	2	4	1	0	0	2.78	1	1	unpregnancy			1
FET	0	2022-03-22 10:18:00	0	28.5	36	22.86	0	3	1	0	0	1.71	1	1	unpregnancy			2
FET	1	2021-05-27 13:54:00	0	28.5	37	20.24	0	1	1	0	0		1	1	Biochemical pregnancy			1
FET	1	2021-08-04 09:34:00	0	28.5	28	19.05	0	2	1	0	0	2.34	1	1	clinical pregnancy			2
FET	1	2019-12-27 14:04:00	0	28.5	27	19.2	0	5	0	0	0		1	1	unpregnancy			2
FET	1	2021-09-27 10:31:00	0	28.5	30	17.69	1	1	1	0	0	5.07	1	1	clinical pregnancy	38+5	3300	2
FET	1	2021-06-22 09:59:00	0	28.5	29	19.14	0	2	1	0	0	5.66	1	1	Biochemical pregnancy			2
FET	1	2020-07-29 11:16:00	0	28.5	31	21.41	0	3	1	0	0	2.79	1	1	clinical pregnancy	40+2	3300	2
FET	0	2021-06-26 10:55:00	0	28.6	29	24.84	2	1	1	0	0	1.71	1	2	unpregnancy			1
FET	0	2020-10-12 14:32:00	0	28.6	29	23.92	0	4	1	0	0	0.76	1	1	unpregnancy			2
FET	0	2021-10-01 12:08:00	0	28.6	28	23.74	0	7	1	0	0	2.75	1	1	clinical pregnancy	38+5	2900	2
FET	0	2021-06-21 10:47:00	0	28.6	30	23.23	0	2	0	0	0	1.83	1	1	unpregnancy			1
FET	0	2021-07-19 13:47:00	0	28.6	35	20.2	0	6	0	0	0		1	2	clinical pregnancy	40+6	3580	2
FET	0	2022-03-29 08:51:00	0	28.6	31	21.88	0	5	1	0	0	1.52	1	1	unpregnancy			1
FET	0	2020-07-03 12:35:00	0	28.6	29	28.89	2	2	0	0	0	2.75	1	1	clinical pregnancy	38+5	2800	1
FET	0	2020-08-20 14:23:00	0	28.6	30	20.08	0	7	0	0	0	1.96	1	1	clinical pregnancy	38+2	3250	2
FET	0	2022-02-18 08:45:00	0	28.6	28	22.04	0	3	1	0	0	4.75	1	1	Biochemical pregnancy			1
FET	0	2021-10-28 11:00:00	0	28.6	29	28.76	2	3	1	0	0	2.61	1	1	unpregnancy			2
FET	0	2021-08-18 10:28:00	0	28.6	30	24.03	2	1	0	0	0	1.24	3	2	Biochemical pregnancy			1
FET	0	2022-05-16 10:31:00	0	28.6	34	24.34	2	1	1	0	0	2.92	1	2	clinical pregnancy			2
FET	0	2021-06-15 11:56:00	0	28.6	29	23.92	0	2	1	0	0	4.42	1	1	Biochemical pregnancy			2
FET	0	2020-04-20 14:35:00	0	28.6	33	24.89	2	2	0	0	0		1	1	clinical pregnancy			1
FET	0	2020-05-19 14:44:00	0	28.6	28	20.31	0	1	1	0	0	4.22	1	1	clinical pregnancy	39+1	3600	2
FET	0	2021-02-19 14:25:00	0	28.6	29	28.6	2	9	0	0	0	7.92	3	1	unpregnancy			1
FET	0	2021-12-24 12:28:00	0	28.6	31	24.09	2	2	1	0	0	4.89	1	1	clinical pregnancy			2
FET	0	2021-10-15 08:53:00	0	28.6	32	18.43	1	6	1	0	0	1.01	1	2	clinical pregnancy	40+3	3250	2
FET	0	2022-04-01 11:06:00	0	28.6	40	27.77	2	3	0	0	0		1	1	clinical pregnancy	32+2	1500	2
FET	0	2020-04-23 10:44:00	0	28.6	31	24.56	2	5	1	0	1	2.44	1	1	clinical pregnancy	39+5	3670	2
FET	0	2020-04-28 10:35:00	0	28.6	33	25.81	2	7	1	0	0	2.95	1	1	HCGpositive			2
FET	0	2020-03-23 10:25:00	0	28.6	30	22.03	0	2	0	0	0	4.42	1	1	clinical pregnancy	31+4	1700	1
FET	0	2022-02-23 09:25:00	0	28.6	31	19.15	0	2	0	0	0	4.77	3	2	unpregnancy			1
FET	0	2021-12-27 08:27:00	0	28.6	31	20.4	0	5	0	0	0		1	2	clinical pregnancy	39+2	3100	2
FET	0	2022-01-14 10:43:00	0	28.6	33	26.35	2	2	1	0	0	3.27	1	1	clinical pregnancy	40+5	3200	2
FET	0	2021-05-05 10:43:00	0	28.6	32	23.42	0	2	0	0	0	17.32	4	1	unpregnancy			1
FET	1	2022-03-30 13:41:00	0	28.6	31	19.74	0	2	0	0	1	1.88	1	1	unpregnancy			2
FET	1	2021-09-03 14:31:00	0	28.6	30	16.65	1	6	0	0	0	4.69	1	1	unpregnancy			2
FET	1	2022-03-21 08:56:00	0	28.6	29	18.83	0	1	0	0	0	7.48	3	2	clinical pregnancy	39+6	3150	1
FET	1	2021-12-24 08:17:00	0	28.6	28	22.76	0	2	1	0	0	10.5	1	1	clinical pregnancy	40+2	3600	2
FET	1	2021-05-06 08:39:00	0	28.6	33	20.43	0	1	1	0	0	1.66	1	1	clinical pregnancy			2
FET	1	2021-08-13 12:01:00	0	28.6	28	23.42	0	1	0	0	0	0.53	3	1	clinical pregnancy			2
FET	1	2022-06-07 10:31:00	0	28.6	30	24.46	2	1	0	0	0	3.15	1	1	clinical pregnancy	40+4	3800	2
FET	0	2021-08-03 14:33:00	0	28.7	30	23.51	0	2	0	0	0		1	1	unpregnancy			1
FET	0	2020-09-18 13:52:00	0	28.7	33	22.89	0	2	1	0	0	2.55	1	1	clinical pregnancy	37+2	2350	1
FET	0	2020-03-26 10:36:00	0	28.7	30	17.58	1	3	1	0	0	4.7	1	1	clinical pregnancy			2
FET	0	2022-05-03 15:37:00	0	28.7	30	20.31	0	1	0	0	0	5.47	1	1	clinical pregnancy	39+5	3130	2
FET	0	2021-03-12 10:11:00	0	28.7	31	21.67	0	8	1	0	0		1	2	Biochemical pregnancy			2
FET	0	2021-07-23 12:15:00	0	28.7	30	18.83	0	3	1	0	0	5.94	4	1	clinical pregnancy	39+3	3500	2
FET	0	2021-10-17 08:21:00	0	28.7	27	25.34	2	5	0	0	0	3.26	1	1	clinical pregnancy	40+5	3800	1
FET	0	2022-06-16 14:08:00	0	28.7	30	20.34	0	1	0	0	0	2.44	1	1	clinical pregnancy	40+6	3200	1
FET	0	2021-09-17 09:23:00	0	28.7	30	19.11	0	3	0	0	0		1	1	clinical pregnancy			1
FET	0	2021-09-02 11:05:00	0	28.7	35	18.03	1	1	0	0	0	5.45	1	1	clinical pregnancy	38+6	3100	2
FET	0	2021-06-13 11:44:00	0	28.7	32	23.42	0	2	0	0	0	17.32	4	1	Biochemical pregnancy			2
FET	0	2021-08-10 08:58:00	0	28.7	33	22.83	0	4	1	0	0	6.9	1	1	clinical pregnancy	41+2	3600	2
FET	0	2022-02-11 08:56:00	0	28.7	33	27.64	2	3	0	0	0	5.5	1	1	Biochemical pregnancy			2
FET	0	2021-07-23 14:09:00	0	28.7	29	23.92	0	2	1	0	0	4.42	1	1	clinical pregnancy	40+5	3600	1
FET	0	2021-04-01 09:08:00	0	28.7	30	19.57	0	4	0	0	0	5.34	1	1	unpregnancy			2
FET	0	2020-06-23 15:26:00	0	28.7	35	16.44	1	4	1	0	0		1	1	clinical pregnancy			2
FET	0	2021-01-28 14:04:00	0	28.7	33	20.2	0	1	1	0	0		3	2	clinical pregnancy	40	3000	2
FET	0	2021-09-30 14:54:00	0	28.7	30	21.38	0	2	0	0	0	3.8	1	1	unpregnancy			2
FET	0	2022-04-27 15:58:00	0	28.7	31	19.74	0	2	0	0	1	1.88	1	1	Biochemical pregnancy			2
FET	0	2022-06-15 11:23:00	0	28.7	31	26.67	2	2	0	0	0	1.47	1	1	unpregnancy			2
FET	0	2022-03-22 11:34:00	0	28.7	31	24.03	2	3	0	0	0	2.73	1	1	clinical pregnancy	38+4	3800	2
FET	0	2022-03-29 09:16:00	0	28.7	31	19.15	0	2	0	0	0	4.77	3	2	clinical pregnancy	40+1	3350	1
FET	1	2021-04-25 11:00:00	0	28.7	33	17.48	1	5	1	0	0		1	1	clinical pregnancy			2
FET	1	2021-07-09 09:15:00	0	28.7	32	20.96	0	3	0	0	0		1	1	unpregnancy			2
FET	1	2022-06-23 10:07:00	0	28.7	31	22.04	0	2	1	0	0	2.16	4	1	clinical pregnancy	35+5	2500/2350	2
FET	0	2021-08-01 11:16:00	0	28.8	31	18.9	0	2	0	0	0	5.37	1	1	Biochemical pregnancy			1
FET	0	2020-06-22 14:23:00	0	28.8	32	18.26	1	2	1	0	0	8.89	1	1	clinical pregnancy	39	3050	2
FET	0	2021-06-07 13:49:00	0	28.8	28	23.44	0	1	0	0	0		1	1	clinical pregnancy	39+6	3550	2
FET	0	2020-05-07 14:38:00	0	28.8	32	24.14	2	2	1	0	0	3.04	1	1	clinical pregnancy	37+3	2900	2
FET	0	2021-08-25 11:14:00	0	28.8	29	24.84	2	1	1	0	0	1.71	1	2	clinical pregnancy			1
FET	0	2021-12-31 11:21:00	0	28.8	39	16.94	1	1	0	0	1	3.02	3	2	clinical pregnancy			1
FET	0	2021-02-21 09:04:00	0	28.8	33	20.31	0	1	0	0	0	5.21	1	1	clinical pregnancy	40+5	3300	1
FET	0	2020-09-03 13:49:00	0	28.8	25	22.68	0	2	1	0	0	3.42	1	1	clinical pregnancy	36	2700	2
FET	0	2022-01-23 10:00:00	0	28.8	29	22.04	0	1	0	0	0	3.99	3	1	unpregnancy			1
FET	0	2020-08-27 14:11:00	0	28.8	31	23.14	0	1	0	0	0	4.81	3	2	clinical pregnancy	38+4	3400	1
FET	0	2020-04-04 10:14:00	0	28.8	30	22.58	0	4	1	0	0	3.08	3	1	unpregnancy			2
FET	0	2022-01-20 10:57:00	0	28.8	31	18.75	0	3	1	0	0		1	1	clinical pregnancy	40+5	3240	1
FET	0	2022-03-23 14:13:00	0	28.8	31	22.89	0	4	1	0	0		1	2	clinical pregnancy	40+6	2950	1
FET	0	2021-02-26 11:35:00	0	28.8	35	22.27	0	2	0	0	0		1	1	unpregnancy			1
FET	0	2020-03-26 10:17:00	0	28.8	34	21.97	0	1	0	0	0	2.47	3	2	HCGpositive			1
FET	0	2020-08-03 14:48:00	0	28.8	29	25.91	2	4	0	0	0		1	1	unpregnancy			2
FET	0	2020-06-09 11:31:00	0	28.8	32	23.23	0	1	0	0	0	2.32	4	1	clinical pregnancy	40+3	3480	2
FET	0	2020-07-02 11:01:00	0	28.8	29	19.23	0	1	0	0	0	4.27	1	1	HCGpositive			1
FET	0	2020-04-13 11:19:00	0	28.8	30	19.81	0	1	0	0	0	4.16	1	1	clinical pregnancy	39+1	3930	2
FET	0	2022-01-06 11:24:00	0	28.8	34	18.43	1	2	0	0	0		1	1	unpregnancy			1
FET	0	2022-05-23 11:55:00	0	28.8	34	22.03	0	1	0	0	0	2.06	1	1	clinical pregnancy	38+2	3350	1
FET	0	2022-06-24 09:30:00	0	28.8	36	22.86	0	3	1	0	0	1.71	4	1	unpregnancy			2
FET	0	2021-11-16 09:05:00	0	28.8	43	24.44	2	1	0	0	0	2.38	1	1	clinical pregnancy			2
FET	0	2022-03-27 08:26:00	0	28.8	29	25.1	2	3	0	0	0		4	1	clinical pregnancy	40+4	2540	2
FET	1	2021-06-08 11:41:00	0	28.8	32	19.47	0	5	1	0	0		1	1	clinical pregnancy	37+2	2400/2800	2
FET	1	2021-07-25 08:41:00	0	28.8	31	23.71	0	1	0	0	0	1.98	1	1	HCGpositive			2
FET	1	2021-04-21 08:48:00	0	28.8	32	20.81	0	3	1	0	0	8.43	1	1	clinical pregnancy	37+1	2550/2300	2
FET	1	2021-10-12 10:57:00	0	28.8	30	16.77	1	1	1	0	0	1.15	1	1	clinical pregnancy	36+6	3100	2
FET	1	2021-12-01 11:25:00	0	28.8	31	21.97	0	1	0	0	0	3.91	1	2	Biochemical pregnancy			2
FET	1	2021-11-05 09:30:00	0	28.8	30	16.65	1	6	0	0	0	4.69	1	1	Biochemical pregnancy			2
FET	1	2021-10-12 14:10:00	0	28.8	37	20.24	0	1	1	0	0		1	1	clinical pregnancy			2
FET	0	2021-09-30 13:53:00	0	28.9	30	23.51	0	2	0	0	0		1	1	clinical pregnancy			2
FET	0	2021-02-25 08:08:00	0	28.9	33	21.93	0	1	1	0	0	1.3	1	1	clinical pregnancy	35+2	2400/2650	2
FET	0	2020-05-01 10:46:00	0	28.9	29	20.13	0	2	1	0	0	1.12	4	1	clinical pregnancy	37+6	2900	2
FET	0	2020-09-11 09:04:00	0	28.9	33	20.28	0	2	1	0	0	6.9	1	2	clinical pregnancy	38+5	3100/2350	2
FET	0	2020-11-13 08:32:00	0	28.9	31	25.34	2	4	1	0	0	2.38	1	1	clinical pregnancy	39+4	3200	1
FET	0	2022-06-25 09:35:00	0	28.9	29	18.37	1	2	1	0	0	13.58	1	1	unpregnancy			2
FET	0	2021-07-09 10:19:00	0	28.9	29	29.3	2	3	0	0	0	1.42	1	1	clinical pregnancy			2
FET	0	2020-04-28 10:08:00	0	28.9	29	21.64	0	1	1	0	0	6.7	1	2	unpregnancy			1
FET	0	2021-09-02 10:27:00	0	28.9	29	19.95	0	2	0	0	0	4.45	1	1	clinical pregnancy	39	2930	2
FET	0	2022-01-01 10:23:00	0	28.9	32	20.58	0	3	0	0	0	8.15	2	1	unpregnancy			1
FET	0	2020-10-08 10:52:00	0	28.9	35	17.26	1	3	1	0	0	2.27	1	1	clinical pregnancy	39+5	3200	1
FET	0	2022-03-25 09:46:00	0	28.9	24	24.44	2	1	1	0	0	1.87	1	2	Biochemical pregnancy			2
FET	0	2021-12-21 08:52:00	0	28.9	30	21.38	0	2	0	0	0	3.8	1	1	clinical pregnancy	39+3	3330	2
FET	0	2021-07-15 10:48:00	0	28.9	39	21.91	0	2	0	0	0	0.88	1	1	unpregnancy			2
FET	0	2022-01-01 10:20:00	0	28.9	34	18.29	1	1	0	0	0		1	1	clinical pregnancy			2
FET	0	2020-08-26 14:30:00	0	28.9	33	25.81	2	7	1	0	0	2.95	1	1	Biochemical pregnancy			2
FET	0	2021-07-23 14:03:00	0	28.9	34	19.98	0	2	1	0	0		2	2	unpregnancy			2
FET	1	2020-07-23 11:43:00	0	28.9	32	21.77	0	3	1	0	0	3.88	1	1	clinical pregnancy	39+4	4150	2
FET	1	2020-08-05 11:27:00	0	28.9	31	24.13	2	5	1	0	0	4.83	1	1	clinical pregnancy			2
FET	1	2021-11-09 15:14:00	0	28.9	33	19.56	0	4	0	0	0	3.89	1	1	unpregnancy			2
FET	1	2021-10-27 09:36:00	0	28.9	28	19.98	0	8	0	0	0	4.76	1	1	clinical pregnancy	39+1	2400/2900	2
FET	1	2022-03-27 08:56:00	0	28.9	29	22.04	0	1	0	0	0	3.99	3	1	unpregnancy			1
FET	1	2021-10-30 10:22:00	0	28.9	30	21.48	0	1	0	0	0	2.2	1	1	unpregnancy			2
FET	0	2021-01-16 11:47:00	0	29	40	23.73	0	5	1	0	0	5.59	1	1	clinical pregnancy	35+5	2800/2500	2
FET	0	2020-03-30 10:44:00	0	29	42	20.28	0	1	0	0	0	4.03	1	2	clinical pregnancy	38+2	3000/2000	2
FET	0	2021-05-20 08:25:00	0	29	28	19.05	0	1	0	0	0	3.05	1	1	unpregnancy			2
FET	0	2021-07-20 08:38:00	0	29	29	23.42	0	3	1	0	0	4.96	1	1	unpregnancy			1
FET	0	2021-01-20 10:22:00	0	29	30	24.98	2	1	0	0	0	3.77	4	1	Biochemical pregnancy			2
FET	0	2021-03-16 15:24:00	0	29	31	23.44	0	1	0	0	0	5.75	1	1	clinical pregnancy	40	3880	2
FET	0	2022-06-18 10:39:00	0	29	31	19.23	0	2	1	0	0	1.21	1	2	Biochemical pregnancy			2
FET	0	2020-08-12 11:30:00	0	29	34	20.03	0	3	0	0	0		1	1	clinical pregnancy	37+5	2650/2450	2
FET	0	2021-06-22 08:41:00	0	29	30	18.99	0	1	1	0	0	0.89	1	1	clinical pregnancy	37+4	2900/3000	2
FET	0	2022-03-25 10:45:00	0	29	32	23.19	0	5	0	0	0	1.19	1	1	unpregnancy			1
FET	0	2021-11-18 10:21:00	0	29	29	20.06	0	3	1	0	0	2.38	1	1	clinical pregnancy	40+2	3050	2
FET	0	2022-04-06 11:27:00	0	29	40	16.94	1	1	0	0	1	3.02	3	2	Biochemical pregnancy			1
FET	0	2020-07-29 13:51:00	0	29	32	20.32	0	1	1	0	0		1	1	clinical pregnancy	40+1	3500	1
FET	0	2021-06-10 14:32:00	0	29	28	17.21	1	3	1	0	0	2.64	1	1	clinical pregnancy	40+3	3550	2
FET	0	2021-05-20 09:03:00	0	29	30	20.31	0	2	0	0	0		1	1	clinical pregnancy	37+4	2880/2380	2
FET	0	2022-04-19 09:39:00	0	29	31	20.08	0	1	1	0	0	7.75	1	1	clinical pregnancy	40+5	3150	2
FET	0	2022-03-01 14:07:00	0	29	32	20.58	0	3	0	0	0	8.15	2	1	clinical pregnancy	35+5	2400/2300	2
FET	0	2021-09-03 11:11:00	0	29	33	24.61	2	4	1	0	0		1	1	unpregnancy			1
FET	1	2021-05-06 10:39:00	0	29	33	23.03	0	1	1	0	0	2.48	1	1	unpregnancy			1
FET	1	2022-03-17 10:25:00	0	29	34	18.43	1	2	0	0	0		1	1	ectopic pregnancy			1
FET	1	2022-06-24 15:13:00	0	29	28	20.06	0	2	1	0	0	1.44	1	1	unpregnancy			2
FET	0	2022-02-11 10:57:00	0	29.1	32	18.22	1	5	1	0	0	4.54	1	2	unpregnancy			1
FET	0	2020-07-21 15:07:00	0	29.1	30	25.78	2	2	0	0	0		1	1	clinical pregnancy	38+4	3100	2
FET	0	2020-06-10 13:51:00	0	29.1	26	17.19	1	2	1	0	0	3.53	1/4	1	Biochemical pregnancy			2
FET	0	2021-08-20 15:57:00	0	29.1	32	20.76	0	4	1	0	0	4.47	1	2	clinical pregnancy	39+5	3800	2
FET	0	2021-11-02 10:30:00	0	29.1	35	19.15	0	6	1	0	0		3	1	clinical pregnancy	38+1	2900	1
FET	0	2021-12-16 10:56:00	0	29.1	32	20.96	0	3	0	0	0		1	1	unpregnancy			1
FET	0	2022-03-15 11:26:00	0	29.1	32	18.22	1	5	1	0	0	4.54	1	2	clinical pregnancy	39+2	3600	2
FET	0	2020-04-03 13:43:00	0	29.1	30	17.99	1	3	1	0	0	5.64	1	1	clinical pregnancy	41+3	3900	1
FET	0	2021-06-07 09:54:00	0	29.1	33	23.03	0	1	1	0	0	2.48	1	1	Biochemical pregnancy			2
FET	0	2021-03-13 09:21:00	0	29.1	30	18.42	1	2	0	0	0	5.18	1	1	unpregnancy			2
FET	0	2022-05-13 13:31:00	0	29.1	32	20.76	0	1	1	0	0	2.85	1	1	clinical pregnancy	37+5	3200/2800	2
FET	0	2021-12-02 09:31:00	0	29.1	30	22.1	0	5	0	0	0	3.04	1	1	unpregnancy			2
FET	0	2022-04-08 08:15:00	0	29.1	35	20.31	0	3	1	0	0	3.28	1	1	clinical pregnancy	40+4	4004	2
FET	0	2021-12-08 08:48:00	0	29.1	33	17.19	1	2	0	0	0	1.14	1	1	clinical pregnancy			2
FET	0	2021-11-06 10:05:00	0	29.1	33	23.42	0	2	0	0	0	17.32	4	1	Biochemical pregnancy			2
FET	0	2022-05-31 16:04:00	0	29.1	29	22.04	0	1	0	0	0	3.99	3	1	unpregnancy			1
FET	0	2021-08-28 08:36:00	0	29.1	30	19.88	0	4	1	0	0	5.47	1	1	unpregnancy			2
FET	0	2020-12-11 09:43:00	0	29.1	33	25.91	2	5	0	0	0	3.72	1	1	clinical pregnancy	37+1	2650/2550	2
FET	0	2021-05-14 08:34:00	0	29.1	29	19.96	0	2	1	0	0	4.22	1	2	Biochemical pregnancy			2
FET	1	2022-04-11 10:36:00	0	29.1	33	29.14	2	2	1	0	0	0.64	1	1	unpregnancy			2
FET	1	2019-12-31 14:24:00	0	29.1	30	19.38	0	4	1	0	0	3.54	1	1	Biochemical pregnancy			2
FET	1	2022-04-11 09:49:00	0	29.1	32	18.83	0	1	1	0	0	1.07	3	1	unpregnancy			1
FET	1	2022-06-15 11:17:00	0	29.1	33	16.02	1	1	0	0	0	7.6	1	1	HCGpositive			1
FET	1	2021-06-20 08:24:00	0	29.1	30	21.48	0	2	0	0	0	2.54	1	1	unpregnancy			2
FET	0	2021-09-20 14:14:00	0	29.2	30	23.42	0	3	1	0	0	4.96	1	1	clinical pregnancy	41+3	3650	2
FET	0	2020-06-24 10:47:00	0	29.2	30	29.02	2	3	1	0	0		1	1	clinical pregnancy			2
FET	0	2021-05-10 10:50:00	0	29.2	31	21.43	0	5	1	0	0	2.57	1	1	Biochemical pregnancy			1
FET	0	2020-04-17 11:11:00	0	29.2	32	21.23	0	3	0	0	0		1	1	clinical pregnancy	41+5	3500	2
FET	0	2021-03-07 09:38:00	0	29.2	29	21.05	0	1	0	0	0	2.91	1	1	unpregnancy			2
FET	0	2021-03-08 14:04:00	0	29.2	38	21.36	0	1	0	0	1		1	2	unpregnancy			1
FET	0	2021-05-10 10:26:00	0	29.2	30	19.95	0	1	1	0	0	1.7	1	1	clinical pregnancy	38	2750/2350	2
FET	0	2021-08-24 10:05:00	0	29.2	30	27.77	2	6	1	0	0	1.24	1	2	Biochemical pregnancy			1
FET	0	2021-07-05 10:36:00	0	29.2	26	22.76	0	1	1	0	0	4.62	1	1	clinical pregnancy	36+4	2700	2
FET	0	2020-06-02 09:55:00	0	29.2	30	20.8	0	5	1	0	0	3.29	1	1	clinical pregnancy	41+4	3170	1
FET	0	2021-10-19 08:48:00	0	29.2	35	23.19	0	3	0	0	0		1	1	unpregnancy			2
FET	0	2021-11-09 09:26:00	0	29.2	29	29.3	2	3	0	0	0	1.42	1	1	Biochemical pregnancy			2
FET	0	2021-12-10 09:15:00	0	29.2	32	19.23	0	3	1	0	0	10.53	4	1	Biochemical pregnancy			2
FET	0	2021-04-24 10:37:00	0	29.2	30	22.41	0	1	0	0	0	3.77	4	2	clinical pregnancy	41+2	3930	1
FET	0	2021-11-30 14:15:00	0	29.2	29	26.71	2	3	0	0	0	5.24	2	1	clinical pregnancy	29+4	1300	2
FET	0	2022-02-11 09:25:00	0	29.2	34	17.97	1	5	0	0	0	2.78	1	1	clinical pregnancy	36+6	2650/2550	2
FET	0	2022-05-13 10:32:00	0	29.2	29	18.37	1	1	1	0	0	1.03	4	1	unpregnancy			1
FET	0	2022-05-14 12:10:00	0	29.2	30	24.03	2	1	1	0	0		1	1	clinical pregnancy	39+2	3650	1
FET	0	2021-03-16 08:40:00	0	29.2	39	19.92	0	6	1	0	0	2.29	1	1	clinical pregnancy	39+2	3500	2
FET	0	2021-11-29 11:55:00	0	29.2	31	17.47	1	2	1	0	0	2.36	1	1	clinical pregnancy	39+6	2080	1
FET	1	2020-12-11 08:42:00	0	29.2	30	25.97	2	1	0	0	0	2.97	1	1	Biochemical pregnancy			2
FET	1	2020-09-24 15:13:00	0	29.2	27	19.2	0	5	0	0	0		1	1	clinical pregnancy	39+1	3222	2
FET	1	2021-08-25 13:45:00	0	29.2	32	21.67	0	8	1	0	0	1.28	1	2	clinical pregnancy	33+1	2150/2000	2
FET	0	2021-09-24 14:34:00	0	29.3	30	20.7	0	4	1	0	0	1.26	1	2	clinical pregnancy	39+3	3350	2
FET	0	2021-09-09 14:43:00	0	29.3	30	23.88	0	4	0	0	0	1.97	1	1	clinical pregnancy	36+4	2500	2
FET	0	2021-06-15 11:34:00	0	29.3	31	17.15	1	5	1	0	0	5.26	1	1	clinical pregnancy	40+4	3550	1
FET	0	2020-01-03 13:51:00	0	29.3	30	17.97	1	7	0	0	0		1	1	clinical pregnancy	37+1	3100/2500	2
FET	0	2021-06-08 08:55:00	0	29.3	30	21.63	0	5	1	0	0	2.46	1	1	clinical pregnancy	39+4	3000	2
FET	0	2020-08-04 11:55:00	0	29.3	36	22.58	0	4	1	0	0	0.51	4	1	clinical pregnancy	40+4	3650	2
FET	0	2021-08-14 10:04:00	0	29.3	29	19.96	0	1	1	0	0	0.56	3	1	unpregnancy			1
FET	0	2020-07-08 14:39:00	0	29.3	32	17.09	1	8	0	0	0		1	1	unpregnancy			2
FET	0	2020-06-22 15:56:00	0	29.3	31	26.67	2	3	1	0	0		1	1/2	Biochemical pregnancy			2
FET	0	2021-06-28 14:34:00	0	29.3	29	19.96	0	2	1	0	0	4.22	1	1	clinical pregnancy	39+6	3550	2
FET	0	2021-09-16 10:38:00	0	29.3	30	22.86	0	2	1	0	0	2.65	1	2	clinical pregnancy	38+2	3250	1
FET	0	2021-10-01 11:22:00	0	29.3	29	20.03	0	3	1	0	0	3.98	3	2	unpregnancy			1
FET	0	2020-10-20 11:03:00	0	29.3	32	17.4	1	3	0	0	0		1	1	clinical pregnancy			1
FET	0	2021-09-27 09:21:00	0	29.3	29	24.97	2	2	1	0	0		1	1	clinical pregnancy	38+3	3700	2
FET	0	2021-12-24 08:52:00	0	29.3	32	20.7	0	3	1	0	0	4.12	1	1	clinical pregnancy	40+3	3650	1
FET	0	2020-03-23 11:02:00	0	29.3	30	19.1	0	2	1	0	0	5.33	1	1	clinical pregnancy	38	2520/3150	2
FET	0	2021-11-29 09:12:00	0	29.3	33	24.61	2	4	1	0	0		1	1	unpregnancy			2
FET	0	2021-06-22 14:23:00	0	29.3	36	26.35	2	4	0	0	0	3.45	1	2	clinical pregnancy	40	3250	2
FET	1	2020-04-21 10:36:00	0	29.3	29	21.09	0	7	1	0	0	2.01	4	2	clinical pregnancy	36+3	2500/3000	2
FET	1	2022-05-15 10:50:00	0	29.3	31	21.97	0	1	0	0	0	3.91	3	2	clinical pregnancy	38+4	3350	1
FET	1	2021-05-01 10:01:00	0	29.3	32	21.36	0	3	1	0	0	6.77	3	1	clinical pregnancy			1
FET	0	2020-03-16 12:31:00	0	29.4	35	21.23	0	1	0	0	0	2.68	1	1	unpregnancy			1
FET	0	2022-03-28 10:23:00	0	29.4	28	25	2	4	1	0	0		1	1	Biochemical pregnancy			2
FET	0	2021-04-08 08:26:00	0	29.4	33	25.22	2	5	0	0	0	7.78	1	2	unpregnancy			1
FET	0	2021-05-08 08:30:00	0	29.4	29	26.17	2	1	1	0	0	2.36	1	1	clinical pregnancy	39+4	3450	2
FET	0	2021-08-04 10:35:00	0	29.4	30	18.03	1	2	0	0	0	2.56	1	1	clinical pregnancy	40+1	3350	2
FET	0	2020-05-18 10:53:00	0	29.4	35	23.44	0	4	0	0	1		1	1	clinical pregnancy	39+6	3800	1
FET	0	2020-10-07 10:42:00	0	29.4	29	28.89	2	3	0	0	0		1	2	Biochemical pregnancy			2
FET	0	2021-10-23 10:48:00	0	29.4	29	20	0	5	0	0	0	5.04	1	1	clinical pregnancy	37+6	3000	2
FET	0	2022-02-20 10:38:00	0	29.4	31	20.31	0	3	1	0	0		4	1	unpregnancy			2
FET	0	2022-06-10 13:36:00	0	29.4	36	18.43	1	2	0	0	0	3.85	1	1	unpregnancy			2
FET	0	2021-12-29 09:50:00	0	29.4	35	17.22	1	1	0	0	0	6.58	1	2	clinical pregnancy	40+6	3200	2
FET	0	2021-11-14 09:57:00	0	29.4	32	20.61	0	4	0	0	0		1	2	Biochemical pregnancy			2
FET	0	2022-01-19 08:49:00	0	29.4	33	23.47	0	5	1	0	0	7.29	1	1	clinical pregnancy	41+6	3550	2
FET	0	2022-04-11 14:19:00	0	29.4	34	19.22	0	4	0	0	0		1	1	clinical pregnancy	39+4	3450	2
FET	1	2022-06-23 10:31:00	0	29.4	32	21.48	0	3	1	0	0	1.4	1	2	unpregnancy			2
FET	1	2021-02-10 11:54:00	0	29.4	31	24.13	2	5	0	0	0	4.83	1	1	unpregnancy			1
FET	1	2021-05-11 15:14:00	0	29.4	29	21.05	0	1	0	0	0	2.91	1	1	clinical pregnancy	37+6	3656	2
FET	1	2021-03-10 13:43:00	0	29.4	31	22.77	0	4	0	0	0		1	1	clinical pregnancy	40	4000	2
FET	0	2020-07-06 09:22:00	0	29.5	36	22.43	0	1	0	0	0	0.4	4	1	unpregnancy			1
FET	0	2021-08-09 08:17:00	0	29.5	29	24.35	2	2	1	0	0	2.98	1	2	clinical pregnancy	39+4	3000	2
FET	0	2021-09-03 15:24:00	0	29.5	31	30.47	2	4	0	0	0		1	1	unpregnancy			1
FET	0	2021-02-10 11:24:00	0	29.5	32	18.67	0	3	0	0	0	1.61	1	1	unpregnancy			1
FET	0	2020-08-14 13:56:00	0	29.5	30	19.84	0	6	0	0	0		1	2	clinical pregnancy	39+3	3250	2
FET	0	2020-11-05 08:36:00	0	29.5	30	18.49	1	3	1	0	0	3.55	4	1	clinical pregnancy	41+1	3700	2
FET	0	2020-09-30 14:10:00	0	29.5	32	19.56	0	4	0	0	0	1.42	1	1	clinical pregnancy	36+1	2000/2500	2
FET	0	2022-04-01 10:59:00	0	29.5	30	24.44	2	3	1	0	0		4	1	clinical pregnancy	40	3000	1
FET	0	2021-09-09 10:04:00	0	29.5	29	22.21	0	1	1	0	0	2.48	1	1	unpregnancy			2
FET	0	2020-06-29 14:02:00	0	29.5	32	18.65	0	6	1	0	0	4.03	1	1	unpregnancy			1
FET	1	2021-12-02 11:00:00	0	29.5	32	20.2	0	1	0	0	0	0.41	3	2	unpregnancy			1
FET	1	2020-09-09 13:57:00	0	29.5	32	17.09	1	8	0	0	0		1	1	clinical pregnancy	39+2	3800	2
FET	1	2021-12-01 10:26:00	0	29.5	29	20.03	0	3	1	0	0	3.98	3	2	clinical pregnancy	41+1	3700	2
FET	1	2021-04-13 10:39:00	0	29.5	29	18.03	1	4	1	0	0	0.46	3	1	clinical pregnancy	40	3000	2
FET	1	2021-10-20 10:17:00	0	29.5	32	22.19	0	1	1	0	0	4.28	1	1	clinical pregnancy	38+2	3550	2
FET	1	2022-04-20 14:05:00	0	29.5	30	22.1	0	5	0	0	0	3.04	1	1	clinical pregnancy			2
FET	0	2020-06-03 11:15:00	0	29.6	36	21.23	0	1	0	0	0	2.68	1	1	clinical pregnancy	39+1	3000	2
FET	0	2021-02-05 10:00:00	0	29.6	33	25.71	2	5	1	0	0	3.19	1	1	unpregnancy			2
FET	0	2021-07-19 16:39:00	0	29.6	34	19.11	0	4	1	0	0	9.44	1	1	clinical pregnancy	36+3	2650/2150	2
FET	0	2021-02-23 15:19:00	0	29.6	30	18.36	1	3	1	0	0		1	1	clinical pregnancy	39+2	3100	2
FET	0	2021-10-31 08:45:00	0	29.6	31	30.73	2	6	0	0	0	2.33	1	1	clinical pregnancy	36+2	2250/2800	2
FET	0	2020-06-09 11:41:00	0	29.6	31	17.15	1	1	0	0	0	1.35	1	1	clinical pregnancy			2
FET	0	2021-02-10 09:43:00	0	29.6	30	20.03	0	2	1	0	0	9.35	1	1	unpregnancy			2
FET	0	2020-05-07 10:46:00	0	29.6	32	22.66	0	3	0	0	0		1	1	clinical pregnancy	38	2352/2351	2
FET	0	2022-06-12 09:37:00	0	29.6	27	19.47	0	3	1	0	0	5.5	1	1	clinical pregnancy	40+5	3054	2
FET	0	2021-01-26 11:45:00	0	29.6	27	27.77	2	4	1	0	0	1.79	1	1	clinical pregnancy			1
FET	0	2020-01-13 14:05:00	0	29.6	30	17.9	1	3	0	0	0		1	1	unpregnancy			2
FET	0	2020-07-30 14:16:00	0	29.6	32	18.65	0	6	1	0	0	4.03	1	1	Biochemical pregnancy			2
FET	0	2022-01-02 11:05:00	0	29.6	30	20.96	0	1	0	0	0	3.9	1	1	clinical pregnancy	41+2	3573	1
FET	0	2021-08-11 09:37:00	0	29.6	37	18.59	0	4	0	0	0	3.01	1	1	clinical pregnancy	37+6	2300	1
FET	0	2020-09-03 14:06:00	0	29.6	35	22.03	0	2	0	0	0	2.93	1	1	clinical pregnancy	40+5	3900	2
FET	0	2020-08-26 14:40:00	0	29.6	32	18	1	2	1	0	0		1	1	clinical pregnancy	35+1	1955/2660	2
FET	0	2022-01-03 09:03:00	0	29.6	32	20.2	0	1	0	0	0	0.41	3	2	clinical pregnancy	41	3450	1
FET	0	2022-06-12 08:51:00	0	29.6	34	18.14	1	1	0	0	0	4.14	1	1	clinical pregnancy			1
FET	0	2021-11-16 10:11:00	0	29.6	31	23.88	0	5	0	0	0	4.79	1	1	Biochemical pregnancy			2
FET	0	2021-09-29 10:43:00	0	29.6	32	30.47	2	4	0	0	0		1	1	clinical pregnancy	40+6	3650	2
FET	0	2022-04-30 09:22:00	0	29.6	30	19.57	0	2	1	0	0	4.89	1	1	unpregnancy			1
FET	0	2021-01-11 11:34:00	0	29.6	31	20.43	0	2	1	0	0	2.74	1	2	Biochemical pregnancy			1
FET	0	2021-09-02 14:43:00	0	29.6	28	18.03	1	4	1	0	0	7.66	1	2	clinical pregnancy	38+2	2700	2
FET	1	2021-11-03 10:31:00	0	29.6	29	22.21	0	1	1	0	0	2.48	1	1	clinical pregnancy	40	3150	2
FET	1	2021-04-19 09:30:00	0	29.6	35	21.51	0	1	0	0	0		1	1	clinical pregnancy			2
FET	1	2021-12-05 08:46:00	0	29.6	33	23.03	0	1	1	0	0	2.48	1	1	clinical pregnancy	37+4	2950	2
FET	1	2021-09-14 09:24:00	0	29.6	32	18.52	0	3	0	0	0	5.09	1	1	clinical pregnancy	36+6	2700/2150	2
FET	1	2020-10-06 10:08:00	0	29.6	29	17.78	1	4	1	0	0	3.94	1	1	unpregnancy			2
FET	1	2022-06-03 11:06:00	0	29.6	33	15.06	1	3	1	0	0	0.71	1	2	clinical pregnancy	39+1	3650	2
FET	0	2022-01-30 12:17:00	0	29.7	32	19.63	0	5	0	0	0	3.72	1	1	clinical pregnancy			2
FET	0	2021-03-11 10:57:00	0	29.7	30	21.97	0	5	0	0	0	2.66	1	1	clinical pregnancy	37+2	3150/2600	2
FET	0	2020-06-15 15:26:00	0	29.7	31	22.07	0	1	0	0	0	1.51	1	1	clinical pregnancy	39	4090	2
FET	0	2021-12-30 10:50:00	0	29.7	33	20.31	0	8	0	0	0		1	2	unpregnancy			1
FET	0	2021-12-12 10:04:00	0	29.7	30	19.23	0	3	1	0	0	3.78	1	1	clinical pregnancy	41	3550	2
FET	0	2021-10-21 09:26:00	0	29.7	32	19.53	0	4	0	0	0	3.2	1	1	Biochemical pregnancy			1
FET	0	2020-08-13 11:20:00	0	29.7	31	18.59	0	3	0	0	0	7.38	1	1	clinical pregnancy	36+6	2600/2550	2
FET	0	2021-03-27 09:52:00	0	29.7	30	20.57	0	2	1	0	0	1.28	1	1	clinical pregnancy	39+5	3150	1
FET	0	2021-06-06 11:10:00	0	29.7	30	20	0	7	1	0	0	2.8	1	1	Biochemical pregnancy			2
FET	0	2021-09-21 15:30:00	0	29.7	30	21.67	0	3	1	0	0	4.88	1	2	unpregnancy			2
FET	0	2021-11-19 08:15:00	0	29.7	32	22.86	0	1	1	0	0	6.02	3	2	Biochemical pregnancy			1
FET	0	2021-03-02 11:13:00	0	29.7	38	20.58	0	5	0	0	0	5.69	1	1	clinical pregnancy			2
FET	0	2020-09-01 11:08:00	0	29.7	27	24.65	2	2	0	0	0		1	1	unpregnancy			2
FET	0	2022-03-04 10:58:00	0	29.7	39	27.05	2	3	1	0	0	1.96	4	2	unpregnancy			2
FET	0	2021-06-30 15:34:00	0	29.7	35	18.43	1	2	0	0	0		1	1	unpregnancy			1
FET	0	2021-07-19 10:28:00	0	29.7	30	21.36	0	4	1	0	0	3.31	1	1	clinical pregnancy	34+6	2450	2
FET	0	2022-06-16 14:40:00	0	29.7	30	19.57	0	2	1	0	0	4.89	1	1	clinical pregnancy	37+5	3120	2
FET	0	2022-03-16 09:09:00	0	29.7	24	19.71	0	2	0	0	0	7.45	1	2	clinical pregnancy	41+3	4350	2
FET	0	2022-05-03 15:05:00	0	29.7	29	19.23	0	2	0	0	0	3.9	1	1	clinical pregnancy	40	3140	1
FET	0	2022-06-02 09:08:00	0	29.7	35	18.83	0	9	1	0	0	4.05	3	1	clinical pregnancy	38+5	2540	1
FET	0	2021-06-28 09:04:00	0	29.7	27	25.59	2	2	0	0	0	4.35	1	1	clinical pregnancy	38+3	3700	1
FET	0	2021-06-28 09:28:00	0	29.7	32	18.75	0	7	0	0	0		1	1	unpregnancy			2
FET	0	2021-10-31 09:06:00	0	29.7	33	25.34	2	5	1	0	0	2.57	3	2	clinical pregnancy	39+5	3050	1
FET	0	2019-12-28 10:43:00	0	29.7	32	19.92	0	2	0	0	1	9.98	1	1	clinical pregnancy	31+6	1500	2
FET	0	2021-12-26 10:37:00	0	29.7	29	24.03	2	2	0	0	0		1	1	clinical pregnancy	41+5	870/890	2
FET	1	2021-08-10 10:48:00	0	29.7	31	24.65	2	2	0	0	0	5.36	1	1	clinical pregnancy	39+4	4070	2
FET	1	2022-01-20 08:56:00	0	29.7	31	21.48	0	2	0	0	0	2.54	1	1	clinical pregnancy	38+2	3430	2
FET	1	2021-07-12 08:37:00	0	29.7	30	18.42	1	3	1	0	0	3.22	1	1	clinical pregnancy	39+2	3400	2
FET	1	2020-07-07 14:24:00	0	29.7	34	19.31	0	1	0	0	0	0.74	4	1	clinical pregnancy	35+1	2000/2100	2
FET	0	2021-08-09 14:17:00	0	29.8	37	24.65	2	3	0	0	0	3.01	1	2	unpregnancy			1
FET	0	2021-03-22 13:45:00	0	29.8	31	20.43	0	2	1	0	0	2.74	1	2	clinical pregnancy	35+5	3660	2
FET	0	2020-10-02 12:27:00	0	29.8	27	24.65	2	2	0	0	0		1	1	Biochemical pregnancy			1
FET	0	2021-05-17 13:57:00	0	29.8	35	18.49	1	6	1	0	0	6.33	1	1	clinical pregnancy	40+4	3950	2
FET	0	2020-08-17 13:43:00	0	29.8	36	16.94	1	1	0	0	1	13.32	1	1	clinical pregnancy	39+6	3350	1
FET	0	2021-03-12 10:38:00	0	29.8	34	17.91	1	1	1	0	0	3.75	1	1	clinical pregnancy	41	3550	1
FET	0	2021-06-03 15:41:00	0	29.8	34	25.81	2	1	0	0	1	4.58	3	2	clinical pregnancy			1
FET	0	2022-01-12 11:24:00	0	29.8	32	21.64	0	2	1	0	0	5.62	1/3	1	unpregnancy			2
FET	0	2020-09-02 14:42:00	0	29.8	30	26.37	2	3	0	0	0	9.63	1	1	unpregnancy			1
FET	0	2020-07-23 11:33:00	0	29.8	34	20.45	0	4	1	0	0	8.48	1	1	clinical pregnancy	40+2	2800	2
FET	0	2020-10-08 10:19:00	0	29.8	33	21.48	0	5	0	0	0		1	1	clinical pregnancy	39	3050	1
FET	0	2021-10-23 08:58:00	0	29.8	33	28.6	2	2	0	0	0		1	2	unpregnancy			2
FET	0	2022-01-05 10:41:00	0	29.8	31	19.31	0	1	0	0	0	3.27	3	2	unpregnancy			1
FET	0	2020-07-23 11:27:00	0	29.8	30	27.34	2	5	0	0	0		1	2	Biochemical pregnancy			2
FET	0	2020-10-09 14:54:00	0	29.8	32	18.65	0	6	1	0	0	4.03	1	1	clinical pregnancy	40+1	2920	2
FET	0	2021-12-12 09:53:00	0	29.8	31	24.35	2	6	0	0	0		1	1	clinical pregnancy	39+3	3400	2
FET	0	2022-05-05 14:46:00	0	29.8	33	25.39	2	2	0	0	0	2.57	1	1	unpregnancy			2
FET	0	2021-07-06 10:57:00	0	29.8	34	24.89	2	2	0	0	0		1	1	clinical pregnancy	38	3700	1
FET	0	2022-06-03 14:30:00	0	29.8	29	21.6	0	3	1	0	0	0.91	1	1	clinical pregnancy	36+3	2750/2450	2
FET	0	2021-09-21 10:27:00	0	29.8	32	23.34	0	2	0	0	0		1	1	clinical pregnancy	39+1	3500	2
FET	0	2022-05-11 09:08:00	0	29.8	30	23.24	0	3	0	0	0		1	1	Biochemical pregnancy			2
FET	0	2021-10-30 09:29:00	0	29.8	31	17.72	1	1	0	0	1	1.39	1	2	clinical pregnancy	42	3650	2
FET	0	2021-05-04 11:52:00	0	29.8	39	26.71	2	3	0	0	1	10.1	1	1	clinical pregnancy			2
FET	0	2022-01-28 08:36:00	0	29.8	33	18.42	1	6	1	0	0	5.64	4	1	clinical pregnancy	41+2	4440	2
FET	1	2021-02-15 09:29:00	0	29.8	32	20.96	0	2	1	0	1	2.46	1	1	clinical pregnancy	39+4	2150	1
FET	1	2020-12-11 08:26:00	0	29.8	30	20.44	0	2	1	0	0	5.05	1	2	clinical pregnancy			1
FET	1	2021-08-18 09:36:00	0	29.8	32	21.67	0	10	0	0	0	4.29	1	1	clinical pregnancy	40+5	4100	2
FET	1	2020-07-31 14:38:00	0	29.8	33	19.43	0	1	0	0	0	3.51	1	1	clinical pregnancy	36+2	2250/2250	2
FET	1	2021-09-07 10:02:00	0	29.8	34	24.61	2	3	0	0	0	0.94	1	1	Biochemical pregnancy			2
FET	1	2020-05-07 10:58:00	0	29.8	39	20.03	0	2	0	0	1	1.59	1	2	unpregnancy			2
FET	1	2022-04-28 10:55:00	0	29.8	32	23.44	0	1	0	0	0	6.75	1	1	clinical pregnancy			2
FET	0	2020-08-26 14:19:00	0	29.9	33	15.24	1	3	0	0	0		1	1	clinical pregnancy	40+1	2930	2
FET	0	2021-04-05 14:48:00	0	29.9	33	21.63	0	5	1	0	0		1	2	clinical pregnancy	39+3	3150	2
FET	0	2021-08-16 16:34:00	0	29.9	30	19.23	0	1	0	0	0	4.27	1	1	unpregnancy			2
FET	0	2021-08-29 08:51:00	0	29.9	34	21.63	0	1	0	0	0	10.43	1	1	unpregnancy			1
FET	0	2021-01-26 11:05:00	0	29.9	30	23.34	0	3	0	0	0	6.62	1	2	unpregnancy			2
FET	0	2021-05-27 11:39:00	0	29.9	39	20.58	0	5	0	0	0	5.69	1	1	unpregnancy			2
FET	0	2021-07-22 10:03:00	0	29.9	31	25.97	2	1	0	0	0	2.97	1	1	clinical pregnancy	40+2	4350	2
FET	0	2021-10-01 10:23:00	0	29.9	33	20.08	0	1	0	0	0	13	1	1	Biochemical pregnancy			2
FET	0	2022-04-22 09:14:00	0	29.9	34	25.78	2	2	1	0	0		1	1	unpregnancy			2
FET	0	2021-06-17 09:13:00	0	29.9	33	17.4	1	3	0	0	0		1	1	clinical pregnancy	39+4	3250	1
FET	0	2021-08-13 11:04:00	0	29.9	30	20	0	7	1	0	0	2.8	4	1	unpregnancy			1
FET	0	2021-10-21 09:16:00	0	29.9	38	20.44	0	4	1	0	0	1.95	1	1	Biochemical pregnancy			2
FET	0	2020-04-21 10:32:00	0	29.9	34	22.86	0	1	0	0	0		1	1	unpregnancy			2
FET	0	2020-10-23 09:26:00	0	29.9	32	21.63	0	5	1	0	0	4.71	1	1	unpregnancy			1
FET	0	2021-04-06 08:32:00	0	29.9	39	25.39	2	4	1	0	0	8.11	4	2	clinical pregnancy	40+2	3600	2
FET	0	2021-07-30 10:19:00	0	29.9	31	20.83	0	3	0	0	0	4.26	1	2	Biochemical pregnancy			1
FET	0	2021-08-02 09:21:00	0	29.9	32	20.28	0	3	0	0	0	3.87	1	2	unpregnancy			1
FET	0	2022-05-20 08:39:00	0	29.9	32	21.76	0	4	1	0	0	1.17	1	1	clinical pregnancy	41+2	3800	2
FET	0	2020-04-03 14:53:00	0	29.9	33	18.55	0	3	0	0	0		1	2	clinical pregnancy			2
FET	0	2021-05-17 10:33:00	0	29.9	27	27.77	2	4	0	0	0	1.79	1	1	unpregnancy			2
FET	0	2021-11-12 11:17:00	0	29.9	34	24.61	2	3	0	0	0	0.94	1	1	unpregnancy			1
FET	0	2022-06-07 11:58:00	0	29.9	34	20.57	0	2	0	0	0	4.94	1	1	clinical pregnancy	37+4	3500	1
FET	0	2020-10-05 13:51:00	0	29.9	27	20.96	0	3	0	0	0	3.47	1	2	clinical pregnancy	36+6	2800/2400	2
FET	0	2021-11-17 14:03:00	0	29.9	38	21.36	0	1	0	0	1		1	2	clinical pregnancy	37+5	3150	1
FET	0	2022-01-06 15:46:00	0	29.9	30	28.72	2	6	0	0	0	3.61	1	1	clinical pregnancy	37+2	2400/2150	2
FET	0	2021-10-05 14:02:00	0	29.9	32	18.75	0	7	0	0	0		1	1	clinical pregnancy	40	3400	2
FET	0	2021-01-28 16:15:00	0	29.9	30	21.19	0	3	1	0	0	10.35	1	2	unpregnancy			2
FET	1	2020-07-29 11:22:00	0	29.9	36	27.34	2	4	0	0	0	1.77	1	1	clinical pregnancy			2
FET	1	2020-09-25 14:22:00	0	29.9	32	20.69	0	3	0	0	0	1.8	1	1	clinical pregnancy	36+4	2500/2500	2
FET	1	2021-11-05 09:11:00	0	29.9	34	24.97	2	1	0	0	0	1.52	1	1	clinical pregnancy			2
FET	1	2022-05-09 10:58:00	0	29.9	40	22.04	0	1	0	0	0	3.28	3/4	1	Biochemical pregnancy			2
FET	0	2021-09-30 11:20:00	0	30	37	24.65	2	3	0	0	0	3.01	1	2	Biochemical pregnancy			2
FET	0	2020-06-23 14:24:00	0	30	33	20.32	0	2	1	0	0	2.7	1	1	unpregnancy			2
FET	0	2020-07-24 11:08:00	0	30	34	21.45	0	3	1	0	0		1	1	clinical pregnancy			2
FET	0	2020-04-04 10:53:00	0	30	31	18.36	1	1	0	0	0	5.62	1	1	clinical pregnancy	40+1	3000	1
FET	0	2020-09-03 15:09:00	0	30	31	23.23	0	2	1	0	0	5.07	1	2	unpregnancy			1
FET	0	2020-07-17 11:13:00	0	30	34	19.81	0	2	1	0	0	2.98	1	1	Biochemical pregnancy			1
FET	0	2021-02-04 11:35:00	0	30	32	20.03	0	4	0	0	0	9.51	1	1	clinical pregnancy	38+4	3000	2
FET	0	2021-03-12 10:06:00	0	30	31	25.34	2	1	0	0	0	0.77	3	2	clinical pregnancy	41+2	3500	1
FET	0	2021-04-05 08:09:00	0	30	30	24.61	2	2	1	0	0	5.16	1	1	clinical pregnancy			2
FET	0	2022-06-26 12:08:00	0	30	32	19.59	0	4	0	0	0		1	2	Biochemical pregnancy			2
FET	0	2021-08-22 09:29:00	0	30	31	18.07	1	3	0	0	0		1	1	clinical pregnancy			2
FET	0	2020-04-10 15:36:00	0	30	33	20.13	0	1	0	0	0		1	1	unpregnancy			1
FET	0	2020-08-21 13:51:00	0	30	33	18.67	0	2	0	0	0	6.15	1	1	clinical pregnancy	34+5	2100/1800	2
FET	0	2020-11-25 15:17:00	0	30	30	16.94	1	10	1	0	0	3.06	1	1	clinical pregnancy	35+5	2600/2400	2
FET	0	2021-10-20 09:47:00	0	30	30	24.84	2	1	0	0	1	7.28	3	2	clinical pregnancy	39+3	4720	1
FET	0	2020-06-09 11:45:00	0	30	30	19.11	0	5	1	0	0		1	1	clinical pregnancy	39+3	3600	1
FET	0	2020-06-09 11:15:00	0	30	32	23.53	0	1	0	0	1		1	1	unpregnancy			1
FET	0	2021-08-02 09:39:00	0	30	31	22.03	0	4	0	0	0	4.36	1	1	Biochemical pregnancy			2
FET	0	2021-12-14 10:19:00	0	30	34	24.61	2	3	0	0	0	0.94	1	1	Biochemical pregnancy			1
FET	0	2020-04-28 10:29:00	0	30	31	25.78	2	1	0	0	0		1	1	clinical pregnancy	39+2	3600	1
FET	0	2020-10-26 14:14:00	0	30	31	29.55	2	5	0	0	0		1	1	unpregnancy			1
FET	0	2022-03-22 10:28:00	0	30	32	20.2	0	3	1	0	0	7.78	1	2	clinical pregnancy	39+3	4030	2
FET	0	2021-11-05 14:14:00	0	30	35	18.2	1	5	0	0	0	5.36	1	1	unpregnancy			1
FET	0	2022-03-08 13:47:00	0	30	37	26.35	2	1	0	0	0	2.74	1	1	Biochemical pregnancy			2
FET	1	2021-12-12 09:45:00	0	30	31	29.24	2	4	0	0	0	9.29	1	1	clinical pregnancy	29+2	1280	2
FET	1	2021-11-21 10:02:00	0	30	32	19.53	0	3	1	0	0	21.69	1	1	unpregnancy			2
FET	1	2021-10-12 10:12:00	0	30	34	27.55	2	3	1	0	0	2.72	1	1	unpregnancy			2
FET	1	2021-10-21 09:38:00	0	30	35	16.41	1	2	1	0	0	2.3	1	1	clinical pregnancy	38+6	2800	1
FET	1	2021-12-19 09:32:00	0	30	32	24.65	2	4	1	0	1	1.3	1	2	clinical pregnancy	34+6	2200/2100	2
FET	1	2022-06-22 08:00:00	0	30	30	27.64	2	2	1	0	0	1.45	1	2	clinical pregnancy	37+2	2600/2500	2
FET	1	2020-10-07 10:49:00	0	30	29	24.61	2	3	1	0	0	2.48	1	1	clinical pregnancy	37+1	2350	2
FET	1	2021-06-01 08:51:00	0	30	33	25.71	2	5	1	0	0	3.19	1	1	clinical pregnancy	38+6	3460	2
FET	0	2021-07-26 13:40:00	0	30.1	32	20.4	0	1	0	0	0	2.56	1	1	Biochemical pregnancy			2
FET	0	2021-07-05 14:16:00	0	30.1	32	19.49	0	3	1	0	0		1	2	Biochemical pregnancy			1
FET	0	2020-03-20 11:53:00	0	30.1	33	19.91	0	2	1	0	0	0.57	3	2	clinical pregnancy			1
FET	0	2020-07-17 11:41:00	0	30.1	32	27.89	2	4	0	0	0		1	1	unpregnancy			1
FET	0	2021-09-10 13:46:00	0	30.1	31	20.28	0	3	1	0	0	0.12	3	2	unpregnancy			2
FET	0	2022-01-11 15:47:00	0	30.1	36	19.91	0	2	0	0	0	0.78	3	1	clinical pregnancy			1
FET	0	2021-07-23 09:35:00	0	30.1	30	18.36	1	3	1	0	0	2.56	1	1	clinical pregnancy	40+2	3800	1
FET	0	2021-09-07 13:52:00	0	30.1	32	21.48	0	3	1	0	0	5.24	1	1	unpregnancy			2
FET	0	2020-10-02 11:23:00	0	30.1	35	20.45	0	1	1	0	1	1.55	1	1	unpregnancy			1
FET	0	2022-01-14 10:04:00	0	30.1	31	16.82	1	5	0	0	0	6.5	1	1	unpregnancy			2
FET	0	2020-04-17 10:52:00	0	30.1	32	17.21	1	2	0	0	0		3	2	Biochemical pregnancy			1
FET	0	2020-02-24 09:43:00	0	30.1	30	28.13	2	3	1	0	0	4.66	1	2	unpregnancy			2
FET	0	2021-09-01 11:07:00	0	30.1	31	22.41	0	2	0	0	0	3.32	1	1	clinical pregnancy	38+6	3250	1
FET	0	2022-05-13 11:56:00	0	30.1	31	25.78	2	7	1	0	0	2.95	1	1	Biochemical pregnancy			2
FET	0	2021-01-21 09:37:00	0	30.1	32	21.63	0	5	1	0	0	4.71	1	1	clinical pregnancy	40+3	3900	2
FET	0	2022-06-07 10:05:00	0	30.1	34	28.67	2	3	1	0	0	2.18	1	1	unpregnancy			1
FET	0	2020-07-17 14:27:00	0	30.1	30	20.06	0	1	0	0	0		1	1	unpregnancy			2
FET	0	2020-10-13 10:31:00	0	30.1	33	33.5	2	3	1	0	0		1	2	Biochemical pregnancy			2
FET	0	2020-01-06 14:15:00	0	30.1	29	18.75	0	1	0	0	0	4.23	1	1	clinical pregnancy	35+1	2500/2200	2
FET	1	2020-08-31 14:03:00	0	30.1	32	23.31	0	3	1	0	0	9.23	1	1	unpregnancy			1
FET	1	2021-10-15 11:30:00	0	30.1	30	20.31	0	4	1	0	0	2.14	1	1	clinical pregnancy	40+2	2800	2
FET	1	2022-04-17 10:39:00	0	30.1	33	20.7	0	1	0	0	0	4.49	1	1	Biochemical pregnancy			2
FET	1	2021-10-26 09:06:00	0	30.1	29	17.26	1	2	0	0	0	0.34	3	1	clinical pregnancy	41+1	3980	1
FET	1	2021-07-20 09:00:00	0	30.1	31	24.8	2	4	1	0	0	4.02	1	1	clinical pregnancy			2
FET	1	2021-11-23 08:30:00	0	30.1	34	16.8	1	4	1	0	0	3.68	1	1	unpregnancy			1
FET	1	2022-06-02 10:31:00	0	30.1	34	23.81	0	4	0	0	0	3.37	4	2	Biochemical pregnancy			2
FET	1	2021-11-17 08:51:00	0	30.1	31	24.97	2	5	0	0	0	3.08	3	1	clinical pregnancy			1
FET	1	2021-09-06 11:45:00	0	30.1	37	20.81	0	3	1	0	0	1.82	1	1	unpregnancy			2
FET	1	2021-03-11 10:06:00	0	30.1	34	22.64	0	9	0	0	0		1	1	unpregnancy			1
FET	0	2020-04-27 13:43:00	0	30.2	31	21.08	0	8	1	0	0	2.97	1	2	clinical pregnancy	38+6	3050	2
FET	0	2020-03-02 12:07:00	0	30.2	32	16.41	1	5	1	0	0	7.46	1	1	unpregnancy			1
FET	0	2020-08-24 15:07:00	0	30.2	31	19.1	0	3	0	0	0	4.95	1	1	clinical pregnancy	39+6	3800	2
FET	0	2021-12-08 14:39:00	0	30.2	38	24.65	2	3	0	0	0	3.01	1	2	unpregnancy			2
FET	0	2021-06-01 09:50:00	0	30.2	31	20.57	0	1	0	0	0	1.27	1	1	clinical pregnancy	37+1	2700/2250	2
FET	0	2021-11-13 09:46:00	0	30.2	34	22.48	0	6	1	0	0	1.29	2	1	unpregnancy			2
FET	0	2020-10-23 14:02:00	0	30.2	33	23.23	0	2	0	0	1	6.27	1	1	clinical pregnancy	37+5	2700/2700	2
FET	0	2020-09-25 14:34:00	0	30.2	31	25.15	2	6	1	0	0	3.02	1	1	clinical pregnancy	39+1	3600	2
FET	0	2022-06-13 11:19:00	0	30.2	32	17.48	1	2	1	0	0	5.24	1	1	clinical pregnancy	39+5	3270	1
FET	0	2021-07-14 08:20:00	0	30.2	29	19.14	0	4	0	0	0		1	1	clinical pregnancy	40+1	3050	2
FET	0	2021-09-04 10:05:00	0	30.2	30	24.92	2	1	0	0	0	1.25	1	2	clinical pregnancy	37+3	2800	1
FET	0	2020-09-11 13:43:00	0	30.2	31	17.9	1	3	0	0	1		1	1	clinical pregnancy			2
FET	0	2022-05-13 12:59:00	0	30.2	31	23.88	0	8	1	0	0		1	1	clinical pregnancy	38+5	2800	1
FET	0	2020-08-19 14:01:00	0	30.2	30	20.06	0	1	0	0	0	1	1	1	unpregnancy			2
FET	0	2021-10-18 08:52:00	0	30.2	32	22.03	0	4	0	0	0	4.36	1	1	unpregnancy			1
FET	0	2021-04-12 09:26:00	0	30.2	34	22.64	0	9	0	0	0		1	1	unpregnancy			2
FET	0	2020-08-02 10:25:00	0	30.2	34	24.78	2	6	1	0	0		1	2	clinical pregnancy	37+1	4350	2
FET	0	2022-04-04 15:15:00	0	30.2	32	19.14	0	5	0	0	0		1	1	unpregnancy			2
FET	0	2021-03-29 11:13:00	0	30.2	35	27.06	2	1	0	0	0	3.7	1	1	unpregnancy			2
FET	0	2022-05-18 09:18:00	0	30.2	31	22.35	0	3	1	0	0	1.12	1	1	clinical pregnancy	40	3400	1
FET	0	2021-03-31 14:03:00	0	30.2	29	18.22	1	5	0	0	0		1	1	clinical pregnancy	38+4	2900	1
FET	0	2022-03-23 09:18:00	0	30.2	32	24.84	2	1	0	0	0	3.78	1	1	clinical pregnancy	26+4	1000	2
FET	0	2020-02-17 09:47:00	0	30.2	33	16.82	1	10	1	0	0	2.69	1	1	Biochemical pregnancy			2
FET	1	2021-12-03 10:41:00	0	30.2	34	27.59	2	1	0	0	0	4.29	1	2	unpregnancy			2
FET	1	2021-11-08 11:41:00	0	30.2	32	21.48	0	3	1	0	0	5.24	1	1	unpregnancy			2
FET	1	2021-11-16 09:12:00	0	30.2	30	22.51	0	8	1	0	0	6.19	4	2	clinical pregnancy	34	2400	1
FET	1	2020-04-28 10:14:00	0	30.2	31	28.13	2	3	1	0	0	4.66	1	2	Biochemical pregnancy			2
FET	1	2021-11-02 09:34:00	0	30.2	33	22.04	0	2	0	0	0	0.75	3	1	clinical pregnancy	39+4	3503	1
FET	0	2020-05-20 11:08:00	0	30.3	34	16.85	1	3	1	0	0	3.9	1	1	unpregnancy			2
FET	0	2021-07-25 10:34:00	0	30.3	32	29.02	2	3	1	0	0		1	1	clinical pregnancy	40+5	3290	1
FET	0	2020-09-22 11:40:00	0	30.3	32	20.7	0	1	1	0	0		4	2	clinical pregnancy	39+3	3350	2
FET	0	2020-01-10 11:06:00	0	30.3	31	20.94	0	1	0	0	0	4.78	1	2	unpregnancy			1
FET	0	2020-07-17 14:20:00	0	30.3	27	18.36	1	1	0	0	0		1	1	unpregnancy			2
FET	0	2020-08-05 13:55:00	0	30.3	33	19.92	0	4	1	0	0		1	1	clinical pregnancy	39+1	3300	2
FET	0	2021-12-24 11:16:00	0	30.3	33	17.69	1	2	1	0	0	1.54	1	1	unpregnancy			2
FET	0	2020-01-02 15:41:00	0	30.3	33	26.22	2	1	0	0	0	5.31	1	1	clinical pregnancy	40+3	3340	2
FET	0	2020-07-13 14:04:00	0	30.3	33	20.13	0	1	0	0	0		1	1	unpregnancy			1
FET	0	2021-10-26 08:44:00	0	30.3	30	19.05	0	2	0	0	0	4.14	1	1	clinical pregnancy	41	3700	2
FET	0	2021-04-09 10:28:00	0	30.3	32	26.17	2	1	1	0	0	3.72	1	1	unpregnancy			2
FET	0	2021-12-27 09:58:00	0	30.3	34	20.81	0	2	1	0	0	3.14	1	1	unpregnancy			2
FET	0	2022-03-24 09:40:00	0	30.3	30	19.38	0	2	1	0	0	1.92	1	2	clinical pregnancy	40	3400	1
FET	0	2022-06-23 11:14:00	0	30.3	41	21.36	0	1	0	0	0	0.98	1	1	clinical pregnancy	39+5	4100	2
FET	0	2020-12-25 11:54:00	0	30.3	35	24.44	2	1	0	0	0		1	1	clinical pregnancy	37+6	3100/3400	2
FET	0	2021-02-02 08:46:00	0	30.3	29	23.81	0	5	1	0	0		1	1	clinical pregnancy			1
FET	0	2022-01-11 09:34:00	0	30.3	29	19.81	0	2	0	0	0	1.96	1	1	unpregnancy			2
FET	0	2022-01-03 14:31:00	0	30.3	34	22.48	0	6	1	0	0		3	1	clinical pregnancy	38+6	2800	2
FET	0	2020-08-20 14:27:00	0	30.3	31	20.03	0	3	0	0	0	5.98	1	1	unpregnancy			2
FET	1	2020-09-10 14:37:00	0	30.3	40	28.62	2	9	1	0	0	5.84	1	1	clinical pregnancy	29	1200	1
FET	1	2020-07-17 11:55:00	0	30.3	32	20.03	0	6	1	0	0	2.64	1	1	unpregnancy			2
FET	1	2021-12-24 08:42:00	0	30.3	30	19.47	0	3	0	0	0	4.29	1	1	Biochemical pregnancy			1
FET	1	2021-10-11 09:42:00	0	30.3	31	26.67	2	1	0	0	0	0.06	1	2	clinical pregnancy	40+2	3330	2
FET	0	2020-09-16 14:36:00	0	30.4	33	20.13	0	1	0	0	0		1	1	unpregnancy			2
FET	0	2020-04-27 11:39:00	0	30.4	33	16.41	1	5	1	0	0	7.46	1	1	clinical pregnancy	37+1	2700/2300	2
FET	0	2020-03-12 12:00:00	0	30.4	33	19.29	0	1	0	0	0	1.68	4	1	clinical pregnancy			2
FET	0	2020-01-13 13:56:00	0	30.4	31	26.77	2	5	1	0	0	3.5	1	2	clinical pregnancy	36+4	2600/2650	2
FET	0	2021-10-21 09:49:00	0	30.4	33	19.22	0	8	1	0	0	3.12	1	1	clinical pregnancy	40+5	3520	1
FET	0	2020-05-12 11:20:00	0	30.4	35	20.31	0	7	1	0	0	2.87	4	1	clinical pregnancy	39+2	2500/2600	2
FET	0	2020-08-19 14:34:00	0	30.4	34	19.14	0	2	1	0	0		1	1	clinical pregnancy	40+4	3150	1
FET	0	2021-09-09 14:56:00	0	30.4	32	27.34	2	3	0	0	0		2	1	clinical pregnancy	28+3	1370	2
FET	0	2020-06-29 14:18:00	0	30.4	36	19.92	0	6	1	0	0	3.95	1	2	clinical pregnancy	37+4	2500	2
FET	0	2021-05-10 10:09:00	0	30.4	32	26.17	2	1	1	0	0	3.72	1	1	clinical pregnancy			1
FET	0	2021-12-13 08:31:00	0	30.4	31	26.93	2	3	1	0	0	1.65	1	1	clinical pregnancy			2
FET	0	2022-04-27 08:41:00	0	30.4	32	27.41	2	6	0	0	1	1.18	1	1	unpregnancy			1
FET	0	2021-03-09 10:18:00	0	30.4	32	17.15	1	1	0	0	0	1.35	1	1	clinical pregnancy	37+3	2444/2480	2
FET	0	2021-08-14 08:38:00	0	30.4	31	23.5	0	1	0	0	0	4.84	1	1	Biochemical pregnancy			2
FET	0	2022-03-15 11:16:00	0	30.4	31	24.97	2	5	0	0	0	3.08	3	1	Biochemical pregnancy			2
FET	0	2022-05-03 10:03:00	0	30.4	34	20.08	0	1	0	0	0	13	1	1	ectopic pregnancy			2
FET	0	2021-12-28 08:27:00	0	30.4	32	21.5	0	5	1	0	0	2.89	1	2	clinical pregnancy	39+2	3250	2
FET	0	2021-03-14 08:37:00	0	30.4	30	21.91	0	2	0	0	0		1	1	Biochemical pregnancy			2
FET	1	2020-07-14 14:12:00	0	30.4	34	16.85	1	3	1	0	0	3.9	1	1	unpregnancy			2
FET	1	2021-09-09 09:09:00	0	30.4	32	21.5	0	1	0	0	0	2.66	1	1	clinical pregnancy	40+1	3700	1
FET	1	2022-01-16 10:51:00	0	30.4	32	22.03	0	4	0	0	1	4.36	1	1	clinical pregnancy	36+2	2750	2
FET	1	2021-08-23 10:31:00	0	30.4	32	22.58	0	3	1	0	0	4.95	1	1	unpregnancy			2
FET	1	2021-06-25 09:23:00	0	30.4	34	22.64	0	9	0	0	0		1	1	clinical pregnancy	36+4	2400/2500	2
FET	1	2021-04-22 08:46:00	0	30.4	37	32.05	2	6	0	0	0	1.61	1	1	clinical pregnancy	38+1	3250	1
FET	0	2020-09-09 14:04:00	0	30.5	27	18.36	1	1	0	0	1		1	1	Biochemical pregnancy			2
FET	0	2020-03-09 13:46:00	0	30.5	31	20.94	0	1	0	0	0	4.78	1	2	clinical pregnancy			2
FET	0	2020-08-31 16:13:00	0	30.5	34	28.44	2	8	0	0	0	4	1	2	clinical pregnancy			2
FET	0	2021-11-05 14:32:00	0	30.5	34	20.43	0	3	1	0	1	1.85	1	1	Biochemical pregnancy			2
FET	0	2020-06-23 15:31:00	0	30.5	32	20.2	0	1	0	0	0	2.4	1	1	clinical pregnancy	39+2	3700	2
FET	0	2020-05-26 11:03:00	0	30.5	37	19.37	0	2	0	0	0		1	1	clinical pregnancy	34+4	2700	1
FET	0	2021-05-31 15:40:00	0	30.5	31	21.78	0	2	1	0	0	4.15	1	1	Biochemical pregnancy			2
FET	0	2020-05-19 10:37:00	0	30.5	33	18.83	0	2	0	0	0	1.87	1	1	unpregnancy			2
FET	0	2020-05-01 11:03:00	0	30.5	35	23.44	0	2	0	0	0		1	1	clinical pregnancy			2
FET	0	2020-08-05 14:17:00	0	30.5	33	22.58	0	3	1	0	0		1	1	clinical pregnancy	39+6	3150	2
FET	0	2021-10-14 08:26:00	0	30.5	36	18.73	0	3	0	0	0		4	1	clinical pregnancy	39+2	3800	1
FET	0	2021-09-09 09:25:00	0	30.5	32	20.06	0	1	0	0	1		3	1	Biochemical pregnancy			1
FET	0	2020-05-22 11:10:00	0	30.5	36	23.71	0	4	1	0	0	5.85	1	1/2	clinical pregnancy	37+5	3350/2330	2
FET	0	2020-08-17 15:10:00	0	30.5	31	22.66	0	3	0	0	0		1	1	clinical pregnancy	33+4	2050/1700	2
FET	0	2020-05-26 14:34:00	0	30.5	33	21.55	0	5	1	0	0	1.12	1	1	unpregnancy			2
FET	0	2020-08-28 16:04:00	0	30.5	32	17.21	1	4	0	0	0	1.21	1	2	Biochemical pregnancy			2
FET	0	2021-04-05 08:31:00	0	30.5	32	22.27	0	1	0	0	0	1.2	1	1	unpregnancy			1
FET	0	2022-02-15 09:14:00	0	30.5	33	20.83	0	3	0	0	0	2.06	1	1	unpregnancy			2
FET	0	2022-04-28 11:43:00	0	30.5	35	18.66	0	2	1	0	0	4.01	1	1	clinical pregnancy	41	2750	2
FET	0	2021-09-20 10:41:00	0	30.5	31	23.5	0	1	0	0	0	4.84	1	1	unpregnancy			2
FET	0	2022-06-15 09:25:00	0	30.5	30	22.22	0	4	1	0	0	4.31	1	1	clinical pregnancy	27+3	950/790	2
FET	0	2021-04-18 09:15:00	0	30.5	31	21.91	0	2	0	0	0		1	1	clinical pregnancy			2
FET	1	2022-02-27 09:48:00	0	30.5	32	25.96	2	1	0	0	0	1.16	1	1	Biochemical pregnancy			2
FET	1	2020-10-13 11:07:00	0	30.5	33	24.45	2	2	1	0	0	2.92	1	1	Biochemical pregnancy			2
FET	1	2021-02-23 09:09:00	0	30.5	27	20.55	0	1	0	0	0	4.19	1	2	clinical pregnancy	37+1	3150	2
FET	1	2021-07-08 09:06:00	0	30.5	35	27.06	2	1	0	0	1	3.7	1	1	clinical pregnancy	39+2	3750	2
FET	1	2022-04-07 14:04:00	0	30.5	35	20.44	0	5	1	0	0	1.94	1	2	unpregnancy			1
FET	1	2021-05-29 08:45:00	0	30.5	31	29.55	2	5	0	0	0		1	1	clinical pregnancy			2
FET	1	2022-05-08 08:53:00	0	30.5	31	18.43	1	3	1	0	0	3.25	1	1	clinical pregnancy	36+6	2490	1
FET	0	2021-08-05 15:35:00	0	30.6	31	21.78	0	2	1	0	0	4.15	1	1	clinical pregnancy	39	3700	1
FET	0	2020-05-22 16:03:00	0	30.6	36	19.53	0	5	0	0	0		1	1	unpregnancy			2
FET	0	2020-05-04 14:57:00	0	30.6	29	22.43	0	1	1	0	0		1	1	Biochemical pregnancy			2
FET	0	2021-09-22 09:48:00	0	30.6	30	25.24	2	3	1	0	0	1.93	1	1	unpregnancy			2
FET	0	2021-05-17 08:32:00	0	30.6	37	19.23	0	4	1	0	0	2.11	1	1	unpregnancy			1
FET	0	2020-07-28 14:24:00	0	30.6	35	25.08	2	4	1	0	0	3.97	3	2	unpregnancy			2
FET	0	2020-08-28 14:35:00	0	30.6	34	17.63	1	5	1	0	0		1	2	unpregnancy			2
FET	0	2021-04-06 10:32:00	0	30.6	33	26.03	2	5	1	0	0	5.06	1	1	clinical pregnancy	37+3	2400/2380	2
FET	0	2021-01-29 08:57:00	0	30.6	33	19.63	0	1	1	0	0	2.35	1	1	unpregnancy			2
FET	0	2022-01-11 15:05:00	0	30.6	33	20.4	0	2	0	0	0	2.56	1	1	unpregnancy			2
FET	0	2021-07-22 15:42:00	0	30.6	30	22.03	0	1	0	0	0	5.14	1	1	Biochemical pregnancy			2
FET	0	2021-09-24 08:40:00	0	30.6	34	32.45	2	1	1	0	0	1.9	1	1	clinical pregnancy	39+3	3900	1
FET	0	2021-10-21 14:41:00	0	30.6	31	23.5	0	1	0	0	0	4.84	1	1	unpregnancy			1
FET	0	2022-03-25 14:18:00	0	30.6	35	20.31	0	1	0	0	0	1.54	4	1	unpregnancy			2
FET	0	2022-06-29 08:32:00	0	30.6	36	20.7	0	4	0	0	0	4.32	1	1	unpregnancy			2
FET	0	2020-09-01 10:59:00	0	30.6	31	22.03	0	5	1	0	0	10.66	1	1	clinical pregnancy			1
FET	0	2021-03-17 10:02:00	0	30.6	36	20.45	0	1	1	0	1	1.55	1	1	Biochemical pregnancy			2
FET	0	2022-05-03 14:35:00	0	30.6	32	20.83	0	4	0	0	0	4.26	1	2	clinical pregnancy	37+3	3350	2
FET	0	2022-06-01 09:19:00	0	30.6	33	19.53	0	3	1	0	0	21.69	4	2	clinical pregnancy	39	3400	2
FET	0	2022-06-10 09:47:00	0	30.6	37	25.89	2	9	0	0	0	2.04	1	1	Biochemical pregnancy			2
FET	0	2020-05-19 11:32:00	0	30.6	39	21.88	0	9	0	0	0	0.92	3	1	unpregnancy			2
FET	0	2022-06-14 14:48:00	0	30.6	34	27.34	2	1	0	0	0	3.06	1	1	clinical pregnancy	39+2	3550	2
FET	1	2021-09-02 11:45:00	0	30.6	35	21.64	0	11	1	0	0	0.26	3	2	clinical pregnancy			2
FET	1	2021-12-24 11:42:00	0	30.6	31	19.23	0	2	0	0	0	1.53	1	1	clinical pregnancy	40+1	3200	2
FET	1	2022-05-13 11:16:00	0	30.6	33	28.13	2	1	1	0	0	2.47	1	1	clinical pregnancy			2
FET	1	2021-10-14 11:45:00	0	30.6	32	23.51	0	4	0	0	1		1	1	unpregnancy			2
FET	1	2022-04-04 08:16:00	0	30.6	31	19.47	0	3	0	0	0	4.29	1	1	unpregnancy			1
FET	1	2020-01-06 10:42:00	0	30.6	32	17.93	1	2	0	0	0		1	1	clinical pregnancy	40+6	3150	2
FET	0	2021-03-11 10:51:00	0	30.7	34	24.01	2	10	0	0	0		1	1	unpregnancy			2
FET	0	2020-09-07 10:38:00	0	30.7	37	21.23	0	2	1	0	0		1	1	clinical pregnancy	38+6	3100	2
FET	0	2020-10-02 11:17:00	0	30.7	29	27.39	2	1	0	0	0	3.26	1	1	Biochemical pregnancy			1
FET	0	2020-06-17 14:18:00	0	30.7	33	18.8	0	4	0	0	0		1	2	clinical pregnancy	38+2	2500	2
FET	0	2020-08-20 14:30:00	0	30.7	34	18.83	0	1	0	0	0	3.71	1	1	clinical pregnancy	39+3	3600	1
FET	0	2020-03-09 14:41:00	0	30.7	31	21.23	0	2	1	0	0	3.33	1	2	clinical pregnancy	37+1	2800/2750	2
FET	0	2021-06-08 08:48:00	0	30.7	35	19.57	0	3	0	0	0		1	1	unpregnancy			2
FET	0	2020-06-16 11:24:00	0	30.7	34	18.97	0	4	1	0	0	2.13	1	2	unpregnancy			1
FET	0	2020-08-31 16:07:00	0	30.7	35	25.08	2	4	1	0	0	3.97	3	2	Biochemical pregnancy			2
FET	0	2021-01-06 10:28:00	0	30.7	31	16.9	1	3	0	0	0	2.38	1	1	Biochemical pregnancy			1
FET	0	2021-09-06 14:38:00	0	30.7	30	19.92	0	4	1	0	0	0.73	2	1	clinical pregnancy			2
FET	0	2021-07-30 10:45:00	0	30.7	32	17.99	1	1	0	0	0	1.65	1	2	clinical pregnancy	39+6	2700	2
FET	0	2020-04-24 13:34:00	0	30.7	29	21.78	0	3	0	0	0	3.48	1	1	clinical pregnancy	38+3	3300	2
FET	0	2021-06-07 10:40:00	0	30.7	40	22.83	0	10	0	0	0		1	1	clinical pregnancy	39	2880	2
FET	0	2021-02-26 08:52:00	0	30.7	36	17.26	1	3	1	0	0	1.44	3	2	unpregnancy			1
FET	0	2020-07-02 14:10:00	0	30.7	28	26.17	2	2	0	0	0		1	1	clinical pregnancy	35+5	2250/2350	2
FET	0	2021-10-05 12:02:00	0	30.7	34	20.57	0	4	0	0	0	3.83	1	1	clinical pregnancy	38	2950/3050	2
FET	0	2022-04-17 10:25:00	0	30.7	40	26.71	2	3	0	0	1	10.1	1	1	clinical pregnancy	37+2	2850	2
FET	0	2021-11-18 11:51:00	0	30.7	32	23.51	0	4	0	0	1		1	1	clinical pregnancy	40+1	3800	2
FET	0	2022-05-02 08:47:00	0	30.7	31	19.72	0	5	1	0	0	2.93	1	1	unpregnancy			2
FET	1	2021-08-10 11:49:00	0	30.7	32	19.57	0	3	0	0	0	3.49	1	1	unpregnancy			2
FET	1	2020-03-31 10:24:00	0	30.7	31	20.96	0	1	0	0	0	1.8	1	1	clinical pregnancy	38+5	3250	2
FET	1	2021-10-23 09:54:00	0	30.7	33	24.8	2	3	1	0	0	8.35	1	1	clinical pregnancy	40	4320	2
FET	1	2022-01-24 08:40:00	0	30.7	34	24.98	2	3	0	0	1		1	2	unpregnancy			2
FET	1	2020-10-16 14:43:00	0	30.7	30	18.43	1	2	1	0	0	2.04	4	1	clinical pregnancy			2
FET	0	2021-12-06 10:39:00	0	30.8	39	20.7	0	2	0	0	0	2.64	1	1	unpregnancy			1
FET	0	2020-04-07 15:37:00	0	30.8	31	18.29	1	2	1	0	0	3.6	1	1	clinical pregnancy	38+5	3722	1
FET	0	2021-08-18 14:30:00	0	30.8	34	22.27	0	1	0	0	0	1.24	1	2	clinical pregnancy	38+6	3400	1
FET	0	2021-07-04 09:32:00	0	30.8	35	19.57	0	3	0	0	0		1	1	clinical pregnancy	41+4	3500	2
FET	0	2021-10-03 09:39:00	0	30.8	30	22.03	0	1	0	0	0	5.14	1	1	clinical pregnancy			2
FET	0	2020-03-27 14:32:00	0	30.8	35	25	2	4	0	0	0	4.63	1	1	clinical pregnancy	30+3	1500/1400	2
FET	0	2020-07-20 15:00:00	0	30.8	37	19.53	0	5	0	0	0		1	1	clinical pregnancy	36+5	2400/3300	2
FET	0	2021-09-09 14:20:00	0	30.8	35	19.1	0	1	0	0	0	3.76	1	1	Biochemical pregnancy			1
FET	0	2021-04-30 09:35:00	0	30.8	32	19.82	0	1	0	0	0	5.64	3	2	clinical pregnancy	40+6	3350	1
FET	0	2020-01-10 10:51:00	0	30.8	31	20.03	0	2	1	0	0	0.47	4	2	unpregnancy			1
FET	0	2021-03-15 09:12:00	0	30.8	31	20.06	0	1	0	0	0		1	1	unpregnancy			2
FET	0	2021-11-05 11:16:00	0	30.8	45	22.66	0	4	0	0	0	0.15	3	2	clinical pregnancy	38+5	3220	1
FET	0	2020-03-30 10:40:00	0	30.8	31	20.57	0	3	1	0	0		1	1	unpregnancy			2
FET	0	2020-06-16 14:38:00	0	30.8	34	19.82	0	2	0	0	0	2.78	1	1	unpregnancy			1
FET	0	2020-08-27 14:18:00	0	30.8	34	21.78	0	4	1	0	0	5.07	1	2	clinical pregnancy	37+3	2650/2900	2
FET	0	2020-04-02 13:42:00	0	30.8	35	18.67	0	1	0	0	1		3	2	unpregnancy			1
FET	0	2021-06-14 14:20:00	0	30.8	32	25.85	2	3	1	0	0	4.16	3	2	clinical pregnancy	40+2	3900	1
FET	0	2021-10-07 09:08:00	0	30.8	35	25	2	2	1	0	0	6.06	1/3	1	clinical pregnancy	38+3	3150	2
FET	0	2022-06-09 09:17:00	0	30.8	32	17.85	1	2	1	0	0	6.52	1	1	clinical pregnancy	38+3	3800	2
FET	0	2021-11-24 10:21:00	0	30.8	33	28.44	2	1	0	0	0	3.89	1	1	unpregnancy			2
FET	0	2020-06-09 15:48:00	0	30.8	33	19.15	0	4	0	0	0		1	2	clinical pregnancy			1
FET	0	2022-06-17 08:40:00	0	30.8	31	19.47	0	3	0	0	0	4.29	1	1	Biochemical pregnancy			1
FET	0	2022-01-04 15:19:00	0	30.8	39	20.7	0	2	0	0	0	2.64	1	1	unpregnancy			2
FET	0	2021-11-10 10:09:00	0	30.8	30	21.48	0	2	0	0	0	6.14	3	1	clinical pregnancy	40+6	3500	1
FET	0	2021-08-09 10:57:00	0	30.8	30	25.39	2	2	0	0	0	1.66	1	1	Biochemical pregnancy			2
FET	0	2022-03-30 09:56:00	0	30.8	33	24.34	2	6	0	0	0	1.87	1	1	Biochemical pregnancy			2
FET	0	2021-04-13 10:06:00	0	30.8	31	19.05	0	2	0	0	0	4.72	3	2	clinical pregnancy	38+3	2500	1
FET	1	2021-03-03 11:24:00	0	30.8	31	20.31	0	1	0	0	0	9.55	1	1	clinical pregnancy			2
FET	1	2021-01-26 10:15:00	0	30.8	30	16.8	1	6	0	0	0	2.29	1	1	unpregnancy			2
FET	1	2021-10-17 09:51:00	0	30.8	30	16.8	1	5	0	0	0	6.27	1	1	clinical pregnancy			2
FET	1	2020-06-04 14:28:00	0	30.8	31	18.73	0	5	0	0	0	8.8	1	1	unpregnancy			2
FET	1	2021-12-10 11:04:00	0	30.8	30	20.58	0	10	1	0	0	4.03	1	1	clinical pregnancy	29+3	1290	2
FET	1	2021-07-12 09:20:00	0	30.8	42	19.31	0	5	0	0	0		3	1	unpregnancy			1
FET	1	2021-12-03 09:25:00	0	30.8	34	23.15	0	3	1	0	0	1.1	1	2	clinical pregnancy	40+6	3600	1
FET	1	2021-05-11 11:09:00	0	30.8	34	21.19	0	3	0	0	0	2.1	1	1	clinical pregnancy			1
FET	1	2022-06-24 11:41:00	0	30.8	33	20.83	0	3	0	0	0	2.06	1	1	clinical pregnancy	38+4	3150	2
FET	1	2022-04-06 09:22:00	0	30.8	32	24.8	2	1	0	0	0	4.02	1	1	clinical pregnancy	38+6	2760	2
FET	0	2020-03-30 15:10:00	0	30.9	37	23.44	0	1	0	0	0		1	1	clinical pregnancy			2
FET	0	2020-04-06 10:56:00	0	30.9	33	19.23	0	3	0	0	0	1.06	1	2	unpregnancy			1
FET	0	2021-01-16 11:53:00	0	30.9	30	21.01	0	3	0	0	0	1.91	1	2	Biochemical pregnancy			2
FET	0	2021-08-28 09:59:00	0	30.9	32	19.56	0	6	0	0	0	3.96	1	1	Biochemical pregnancy			2
FET	0	2022-05-06 09:11:00	0	30.9	32	18.67	0	7	0	0	0	18.67	1	1	clinical pregnancy	40+3	2900	2
FET	0	2021-07-08 09:54:00	0	30.9	32	18.03	1	2	0	0	0	1.04	1	1	clinical pregnancy	37+2	2800/2600	2
FET	0	2021-09-26 10:33:00	0	30.9	33	15.2	1	1	0	0	0	0.37	3/4	1	clinical pregnancy			2
FET	0	2020-01-14 09:54:00	0	30.9	30	21.5	0	6	0	0	1	1.64	3	1	Biochemical pregnancy			2
FET	0	2020-03-27 10:26:00	0	30.9	39	20.31	0	1	0	0	0	2.02	1	1	clinical pregnancy	37	2500/2400	2
FET	0	2021-05-28 10:31:00	0	30.9	36	24.2	2	1	1	0	0	3.99	1	1	clinical pregnancy	39+2	3010	2
FET	0	2021-06-24 14:11:00	0	30.9	34	21.45	0	2	0	0	0		1	1	clinical pregnancy	37+1	2650/2550	2
FET	0	2020-07-02 15:45:00	0	30.9	27	16.94	1	2	0	0	0	4.63	1	2	clinical pregnancy	40+3	3450	2
FET	0	2021-08-12 09:27:00	0	30.9	42	19.31	0	5	0	0	0		3	1	unpregnancy			1
FET	0	2021-12-07 10:43:00	0	30.9	33	23.63	0	4	1	0	0	0.56	4	2	clinical pregnancy	39+3	3450	1
FET	0	2020-07-02 14:15:00	0	30.9	31	18.73	0	5	0	0	0	8.8	1	1	unpregnancy			2
FET	0	2021-05-04 10:29:00	0	30.9	27	20.76	0	1	0	0	0	6.32	1	2	unpregnancy			1
FET	0	2021-07-18 10:50:00	0	30.9	28	17.97	1	2	1	0	0	3.38	1	1	unpregnancy			1
FET	0	2021-10-07 13:36:00	0	30.9	35	19.1	0	1	0	0	0		1	1	clinical pregnancy	36+6	2900/2350	2
FET	0	2021-10-14 10:42:00	0	30.9	36	17.35	1	4	0	0	0	8.11	3	1	clinical pregnancy			1
FET	0	2021-11-18 10:48:00	0	30.9	32	20.93	0	4	1	0	0	5.05	1	1	unpregnancy			1
FET	0	2021-10-05 15:26:00	0	30.9	34	23.01	0	2	1	0	0		1	1	unpregnancy			1
FET	0	2021-01-25 09:20:00	0	30.9	35	20.32	0	4	1	0	0		4	2	Biochemical pregnancy			2
FET	0	2022-04-28 14:57:00	0	30.9	28	24.34	2	4	0	0	0	2.94	1	1	clinical pregnancy	38+6	2600	1
FET	0	2020-08-03 13:50:00	0	30.9	32	20.94	0	1	0	0	0	4.78	1	2	unpregnancy			2
FET	0	2021-07-18 09:33:00	0	30.9	33	21.23	0	4	0	0	0	4.43	1	2	clinical pregnancy	34	2500	2
FET	0	2021-01-28 09:36:00	0	30.9	31	22.58	0	1	1	0	0		1	1	clinical pregnancy	37+5	2930/2830	2
FET	1	2022-02-13 09:24:00	0	30.9	33	24.17	2	1	1	0	0	6.05	1	1	unpregnancy			1
FET	1	2021-01-12 15:05:00	0	30.9	31	18.66	0	2	0	0	0	0.12	1	1	clinical pregnancy	40+2	3550	2
FET	1	2022-03-01 08:37:00	0	30.9	27	29.9	2	2	0	0	0	0.73	3	2	clinical pregnancy	40	3300	1
FET	1	2021-04-13 10:27:00	0	30.9	33	24.45	2	2	1	0	0	2.92	1	1	Biochemical pregnancy			2
FET	1	2022-02-15 08:07:00	0	30.9	32	22.31	0	1	1	0	0	5.81	4	1	clinical pregnancy			1
FET	0	2022-05-20 11:44:00	0	31	32	22.48	0	2	0	0	0	1.28	1	1	Biochemical pregnancy			2
FET	0	2020-08-17 14:04:00	0	31	32	21.36	0	1	0	0	0		1	1	clinical pregnancy	39	3250	2
FET	0	2020-03-16 15:44:00	0	31	32	20.7	0	3	0	0	0		1	1	Biochemical pregnancy			2
FET	0	2022-01-02 10:39:00	0	31	28	18.42	1	2	1	0	0	4.41	1	1	unpregnancy			2
FET	0	2020-07-10 10:56:00	0	31	38	24.61	2	1	0	0	1	2.56	1	1	clinical pregnancy			2
FET	0	2022-04-19 08:42:00	0	31	30	32.03	2	5	0	0	0	2.27	1	1	Intrauterine and extrauterine pregnancy			2
FET	0	2020-06-05 11:38:00	0	31	29	19.63	0	2	0	0	0		1	1	Biochemical pregnancy			2
FET	0	2020-06-12 10:46:00	0	31	39	24.61	2	1	0	0	0	6.35	4	2	clinical pregnancy			1
FET	0	2021-09-10 10:19:00	0	31	42	19.31	0	5	0	0	0		3	1	Biochemical pregnancy			2
FET	0	2022-02-20 09:14:00	0	31	28	20.78	0	1	1	0	0		1	1	Biochemical pregnancy			2
FET	0	2020-10-08 10:46:00	0	31	28	18.36	1	1	0	0	0	3.42	1	1	ectopic pregnancy			2
FET	0	2021-06-03 14:25:00	0	31	31	21.1	0	3	0	0	0		1	1	clinical pregnancy	40+4	3500	1
FET	0	2021-09-28 09:16:00	0	31	28	25.65	2	2	0	0	0	5.3	1	2	unpregnancy			2
FET	0	2020-01-03 10:44:00	0	31	43	19.57	0	5	1	0	0	4.3	1	1	Biochemical pregnancy			2
FET	0	2021-08-16 10:30:00	0	31	28	17.97	1	2	1	0	0	3.38	1	1	clinical pregnancy	36+1	2680/2190	2
FET	0	2021-04-07 10:03:00	0	31	31	18.37	1	3	0	0	0		1	1	clinical pregnancy	40	3700	2
FET	0	2022-01-07 11:16:00	0	31	28	22.83	0	3	0	0	0		1	1	clinical pregnancy			1
FET	0	2021-12-02 10:23:00	0	31	31	17.97	1	4	1	0	0		1	1	clinical pregnancy	38+2	2950	1
FET	0	2020-06-23 10:55:00	0	31	35	18.67	0	1	0	0	1		4	2	unpregnancy			1
FET	0	2020-09-15 11:17:00	0	31	33	20.83	0	1	0	0	0		1	1	Biochemical pregnancy			2
FET	0	2021-07-20 11:29:00	0	31	32	25.4	2	5	1	0	0	4.43	1	1	Biochemical pregnancy			2
FET	0	2020-10-02 12:20:00	0	31	33	22.04	0	7	0	0	0	7.19	1	1	clinical pregnancy	36+4	2650	2
FET	0	2021-12-24 11:31:00	0	31	34	16.18	1	1	0	0	1	2.24	1	2	unpregnancy			1
FET	0	2021-09-07 10:46:00	0	31	33	17.44	1	2	1	0	1	5.72	1	1	clinical pregnancy	39+6	3585	2
FET	0	2022-03-14 09:58:00	0	31	31	23.5	0	1	0	0	0	4.84	1	1	clinical pregnancy	38+5	2750	2
FET	0	2022-05-27 13:46:00	0	31	32	20.28	0	8	1	0	0	2.67	1	1	Biochemical pregnancy			2
FET	1	2021-04-21 14:05:00	0	31	40	27.06	2	3	0	0	0	1.3	1	1	unpregnancy			1
FET	1	2022-01-19 11:35:00	0	31	32	20.93	0	4	1	0	0	5.05	1	1	clinical pregnancy	38+3	3360	2
FET	1	2020-07-14 13:49:00	0	31	37	26.04	2	6	1	0	0	2.63	1	1	clinical pregnancy			2
FET	1	2020-05-26 14:57:00	0	31	32	24.65	2	4	0	0	0	5.05	1	1	Biochemical pregnancy			2
FET	1	2021-11-11 09:42:00	0	31	35	16.77	1	5	1	0	0		1	1	Biochemical pregnancy			2
FET	1	2021-10-22 09:24:00	0	31	34	22.22	0	5	1	0	0	4.17	1	2	clinical pregnancy	39+6	2750	2
FET	1	2021-09-06 13:40:00	0	31	30	23.6	0	4	1	0	1	2.65	1	1	unpregnancy			1
FET	1	2021-12-25 10:14:00	0	31	33	23.5	0	2	1	0	0	3.91	1	1	unpregnancy			1
FET	1	2021-11-14 09:37:00	0	31	35	26.04	2	10	0	0	0		1	2	Biochemical pregnancy			2
FET	1	2020-05-01 10:57:00	0	31	35	25.39	2	1	0	0	0	1.32	3	2	clinical pregnancy	38+2	3750	1
FET	0	2021-07-15 11:35:00	0	31.1	34	21.45	0	3	1	0	0	1.34	1	1	Biochemical pregnancy			1
FET	0	2022-01-30 09:51:00	0	31.1	29	18.42	1	2	1	0	0	4.41	1	1	unpregnancy			2
FET	0	2021-11-03 09:54:00	0	31.1	30	23.81	0	5	0	0	0		1	1	Biochemical pregnancy			2
FET	0	2020-06-22 09:38:00	0	31.1	30	28.04	2	6	1	0	0	1.51	1	1	unpregnancy			2
FET	0	2020-03-25 10:54:00	0	31.1	40	23.44	0	4	1	0	0		1	1	clinical pregnancy	38+1	2710	2
FET	0	2021-01-15 09:49:00	0	31.1	37	16.82	1	1	0	0	0	20.24	1	2	unpregnancy			2
FET	0	2021-02-01 10:37:00	0	31.1	28	21.49	0	4	0	0	0	1.65	1	1	unpregnancy			2
FET	0	2021-03-09 13:47:00	0	31.1	34	21.41	0	1	0	0	0	4.75	1	1	unpregnancy			2
FET	0	2020-10-16 14:04:00	0	31.1	33	20.83	0	1	0	0	0		1	1	unpregnancy			2
FET	0	2021-05-24 10:15:00	0	31.1	31	20.31	0	1	0	0	0	9.55	1	1	unpregnancy			2
FET	0	2021-07-09 11:08:00	0	31.1	28	20.76	0	1	0	0	0	6.32	1	2	Biochemical pregnancy			2
FET	0	2022-03-13 08:19:00	0	31.1	36	21.64	0	1	0	0	0	0.26	3	2	unpregnancy			1
FET	0	2021-12-06 10:49:00	0	31.1	35	23.01	0	2	1	0	0		1	1	clinical pregnancy	32+3	1800	2
FET	0	2022-04-24 08:39:00	0	31.1	39	19.53	0	1	0	0	0	1.37	3	2	clinical pregnancy	37+4	2700	1
FET	0	2020-08-11 11:03:00	0	31.1	35	18.49	1	5	1	0	0		4	1	Biochemical pregnancy			2
FET	0	2022-03-18 09:10:00	0	31.1	30	18.73	0	5	0	0	0	2.17	1/4	1/2	clinical pregnancy	40+2	3100	2
FET	0	2022-04-29 12:17:00	0	31.1	29	20.78	0	1	1	0	0		1	1	clinical pregnancy	39+3	3200	1
FET	0	2021-02-26 15:37:00	0	31.1	34	24.52	2	5	0	0	0		2	1	unpregnancy			2
FET	0	2022-04-13 10:22:00	0	31.1	31	24.61	2	1	0	0	1	5.16	1	1	clinical pregnancy	39+4	3300	1
FET	1	2020-07-16 15:02:00	0	31.1	32	26.04	2	5	1	0	0	6.69	4	2	Biochemical pregnancy			2
FET	1	2021-07-29 10:20:00	0	31.1	34	19.63	0	1	1	0	0	2.35	1	1	Biochemical pregnancy			2
FET	1	2019-12-31 13:45:00	0	31.1	32	19.03	0	1	1	0	0	4.63	1	1	unpregnancy			2
FET	1	2020-11-20 08:30:00	0	31.1	35	22.22	0	4	1	0	0	4.87	1	1	clinical pregnancy	38+5	2350/2250	2
FET	1	2021-01-08 11:45:00	0	31.1	32	21.09	0	1	1	0	0		3	1	clinical pregnancy	40+1	3920	2
FET	0	2020-02-28 11:11:00	0	31.2	32	17.4	1	3	1	0	0	5.27	1	1	clinical pregnancy	39+5	3000	1
FET	0	2021-04-07 14:29:00	0	31.2	32	33.46	2	3	0	0	0	0.98	1/4	1	clinical pregnancy	39	4300	2
FET	0	2020-05-05 11:44:00	0	31.2	35	20.7	0	1	0	0	0	2.44	3	1	unpregnancy			2
FET	0	2022-06-24 10:45:00	0	31.2	31	18.03	1	2	0	0	0		1	1	unpregnancy			1
FET	0	2020-09-14 14:11:00	0	31.2	35	18.49	1	5	0	0	0		4	1	clinical pregnancy	41+2	4200	2
FET	0	2020-05-29 11:17:00	0	31.2	32	28.37	2	6	1	0	0		1	1	clinical pregnancy	41+1	3600	2
FET	0	2021-01-14 10:37:00	0	31.2	33	25.72	2	6	0	0	0		1	1	unpregnancy			1
FET	0	2021-06-14 10:10:00	0	31.2	39	23.01	0	1	0	0	0		1	1	Biochemical pregnancy			2
FET	0	2020-04-24 10:41:00	0	31.2	41	23.44	0	3	0	0	0	1.25	1	1	clinical pregnancy	36+5	2600/2800	2
FET	0	2020-06-05 15:14:00	0	31.2	30	22.6	0	3	0	0	0	3.91	1	1	clinical pregnancy			2
FET	0	2020-07-07 14:43:00	0	31.2	31	25.4	2	1	0	0	0	1.93	1	1	unpregnancy			2
FET	0	2021-04-06 09:18:00	0	31.2	30	18.43	1	2	0	0	0	2.04	4	1	clinical pregnancy	40+1	2350	1
FET	0	2021-05-20 09:15:00	0	31.2	30	24.65	2	5	0	0	0	3.95	1	2	clinical pregnancy	39+6	3450	1
FET	0	2020-08-19 14:37:00	0	31.2	30	22.31	0	3	1	0	0	0.58	1/4	1	unpregnancy			2
FET	0	2021-04-13 11:09:00	0	31.2	43	18.18	1	7	0	0	0	3.49	1	1	unpregnancy			2
FET	0	2021-07-08 11:42:00	0	31.2	41	27.06	2	3	0	0	0	1.3	1	1	clinical pregnancy	38+5	4000	2
FET	0	2020-04-01 10:43:00	0	31.2	32	25.64	2	3	1	0	0	3.25	4	2	clinical pregnancy	38+5	3050	1
FET	0	2020-06-16 14:32:00	0	31.2	32	20.7	0	3	0	0	0		4	1	clinical pregnancy			2
FET	0	2021-04-13 11:56:00	0	31.2	37	23.88	0	3	0	0	0		1	1	unpregnancy			1
FET	0	2022-06-24 08:56:00	0	31.2	31	21.91	0	5	0	0	0	1.13	1	1	unpregnancy			1
FET	0	2022-04-07 08:41:00	0	31.2	31	24.03	2	1	1	0	0	2.26	3	2	unpregnancy			1
FET	0	2021-04-21 10:04:00	0	31.2	33	21.09	0	3	0	0	0	4.2	1	2	clinical pregnancy	39+3	2680	1
FET	0	2021-10-12 10:43:00	0	31.2	32	20.31	0	3	0	0	0	1.26	3	2	clinical pregnancy	38	3300	2
FET	0	2022-05-26 11:01:00	0	31.2	36	25.82	2	2	0	0	0	2.26	1	1	clinical pregnancy			2
FET	0	2021-02-10 08:56:00	0	31.2	35	18.31	1	4	1	0	0	4.49	1	1	clinical pregnancy	38+2	3050	1
FET	0	2020-04-13 14:37:00	0	31.2	25	19.23	0	2	0	0	0		1	1	clinical pregnancy	37+5	2500/2550	2
FET	0	2020-08-24 14:39:00	0	31.2	31	15.23	1	5	0	0	1	3.6	1	1	clinical pregnancy	42+2	2900	2
FET	0	2022-03-23 10:08:00	0	31.2	29	19.11	0	2	1	0	0	7.35	1	1	Biochemical pregnancy			1
FET	0	2022-05-05 13:48:00	0	31.2	39	20.7	0	2	0	0	0	2.64	1	1	unpregnancy			2
FET	1	2021-09-10 12:10:00	0	31.2	34	20.03	0	2	0	0	1		1	2	clinical pregnancy	38+6	3430	2
FET	1	2021-04-16 09:03:00	0	31.2	36	19.98	0	10	1	0	1	5.27	3	2	unpregnancy			1
FET	1	2021-03-23 08:36:00	0	31.2	33	22.58	0	3	0	0	1	5.34	1	1	unpregnancy			2
FET	1	2021-07-18 10:51:00	0	31.2	31	20.31	0	1	0	0	0	9.55	1	1	unpregnancy			2
FET	1	2020-05-06 11:11:00	0	31.2	32	21.77	0	3	1	0	0	5.99	1	1	clinical pregnancy	39+3	3450	2
FET	1	2020-09-24 15:22:00	0	31.2	30	27.06	2	2	0	0	0		1	1	Biochemical pregnancy			2
FET	1	2020-03-05 13:51:00	0	31.2	31	21.83	0	1	1	0	0	4.26	1	1	clinical pregnancy			2
FET	0	2021-08-29 09:33:00	0	31.3	34	18.66	0	4	0	0	0	1.78	1	1	unpregnancy			2
FET	0	2020-09-07 10:45:00	0	31.3	31	18.82	0	2	1	0	0	2.24	1	1	Biochemical pregnancy			1
FET	0	2021-09-24 10:58:00	0	31.3	33	17.8	1	1	0	0	0	1.43	1	2	clinical pregnancy			1
FET	0	2022-01-12 10:55:00	0	31.3	44	24.22	2	2	1	0	0	6.16	1	1	clinical pregnancy	34+6	2450	1
FET	0	2021-03-18 10:56:00	0	31.3	35	24.97	2	2	0	0	0		1	1	clinical pregnancy	39	3500	2
FET	0	2020-04-23 10:41:00	0	31.3	31	20.7	0	4	1	0	0	9.17	1	1	clinical pregnancy	39+3	3550	1
FET	0	2022-01-15 09:51:00	0	31.3	30	23.81	0	5	0	0	1		1	1	clinical pregnancy	39+1	2600	2
FET	0	2020-06-10 14:17:00	0	31.3	30	19.81	0	3	0	0	0		1	1	HCGpositive			1
FET	0	2020-09-21 14:05:00	0	31.3	32	26.04	2	5	1	0	0	6.69	4	2	clinical pregnancy			1
FET	0	2021-04-29 10:01:00	0	31.3	28	21.49	0	4	0	0	0	1.65	3	1	clinical pregnancy	39+6	3780	1
FET	0	2021-05-24 09:19:00	0	31.3	32	20.55	0	3	1	0	0	4.92	3	1	clinical pregnancy	39+3	3650	2
FET	0	2020-10-06 10:17:00	0	31.3	33	21.88	0	1	0	0	0	4.9	3	1	clinical pregnancy	36+6	2753/2153	2
FET	0	2020-04-20 10:33:00	0	31.3	36	16.63	1	1	0	0	0		2	1	unpregnancy			2
FET	0	2020-04-15 10:57:00	0	31.3	41	25.71	2	1	0	0	0		1	1	unpregnancy			2
FET	0	2021-06-03 09:33:00	0	31.3	34	27.12	2	2	0	0	0	3.98	1	2	clinical pregnancy	40+4	3200	1
FET	0	2021-07-03 10:53:00	0	31.3	31	19.57	0	1	1	0	0	1.05	1	1	unpregnancy			1
FET	0	2021-05-21 09:39:00	0	31.3	36	19.98	0	10	1	0	1	5.27	3	2	unpregnancy			1
FET	0	2021-03-30 09:23:00	0	31.3	37	16.82	1	1	0	0	1		1	2	unpregnancy			2
FET	0	2021-09-11 09:56:00	0	31.3	32	18.99	0	4	0	0	0	2.24	1	2	clinical pregnancy	40+3	3700	1
FET	0	2022-06-02 08:31:00	0	31.3	33	24.22	2	6	1	0	0	1.43	1	1	clinical pregnancy	40+1	4500	2
FET	0	2022-04-29 11:48:00	0	31.3	30	19.11	0	2	1	0	0	7.35	1	1	unpregnancy			1
FET	0	2021-01-12 10:49:00	0	31.3	32	20.94	0	1	0	0	0	4.78	1	2	clinical pregnancy	39+1	3960	2
FET	0	2021-05-24 08:14:00	0	31.3	35	16.85	1	3	1	0	0	3.9	1	1	unpregnancy			1
FET	0	2022-03-14 08:17:00	0	31.3	40	25.15	2	1	0	0	1	4.67	3	1	clinical pregnancy	38+1	3300	2
FET	0	2020-09-22 11:54:00	0	31.3	31	18.18	1	5	0	0	0	2.45	1	1	unpregnancy			1
FET	1	2020-04-14 14:50:00	0	31.3	32	19.03	0	1	1	0	0	4.63	1	1	clinical pregnancy	39+5	3000	1
FET	1	2021-03-27 09:27:00	0	31.3	35	25.08	2	4	1	0	1	3.97	3	2	unpregnancy			2
FET	1	2021-06-07 09:19:00	0	31.3	36	20.32	0	4	1	0	0		4	2	unpregnancy			2
FET	1	2021-12-01 11:33:00	0	31.3	32	25.4	2	5	1	0	0	4.43	1	1	clinical pregnancy			2
FET	1	2022-05-01 08:57:00	0	31.3	31	16.8	1	5	0	0	0	6.27	1	1	unpregnancy			1
FET	1	2021-09-23 08:22:00	0	31.3	31	20.06	0	3	0	0	0		3	2	clinical pregnancy			1
FET	1	2021-12-09 10:47:00	0	31.3	31	21.72	0	3	0	0	0		1	1	clinical pregnancy	41+4	3850	1
FET	1	2022-02-22 08:56:00	0	31.3	32	19.2	0	1	1	0	0	1.95	1	1	clinical pregnancy	37	2500/2500	2
FET	0	2020-01-13 14:13:00	0	31.4	33	22.22	0	2	0	0	0		1	1	clinical pregnancy	40+5	3800	2
FET	0	2022-06-23 13:43:00	0	31.4	30	19.11	0	2	1	0	1	7.35	1	1	Biochemical pregnancy			2
FET	0	2020-06-08 11:22:00	0	31.4	31	21.79	0	3	0	0	0		1	1	clinical pregnancy	37+3	2750/2765	1
FET	0	2020-06-19 10:31:00	0	31.4	34	19.92	0	7	1	0	0	0.94	3/4	1	unpregnancy			2
FET	0	2021-01-20 09:04:00	0	31.4	34	19.14	0	6	1	0	0	5.5	1	1	clinical pregnancy	40+1	2850	2
FET	0	2020-07-03 14:40:00	0	31.4	31	21.5	0	6	0	0	1	1.64	3	1	unpregnancy			2
FET	0	2020-08-28 14:03:00	0	31.4	31	23.07	0	5	1	0	0	2.49	1	1	unpregnancy			1
FET	0	2020-09-24 15:18:00	0	31.4	30	19.14	0	3	1	0	0	7.37	1	2	clinical pregnancy			1
FET	0	2020-10-26 14:02:00	0	31.4	34	25.78	2	4	0	0	0		1	1	clinical pregnancy	40+6	3800	1
FET	0	2020-03-24 12:14:00	0	31.4	36	19.07	0	2	1	0	1		1	1	clinical pregnancy	40+2	3140	2
FET	0	2020-07-31 10:59:00	0	31.4	46	22.27	0	5	0	0	0	6.11	3	2	unpregnancy			2
FET	0	2020-09-30 14:43:00	0	31.4	31	20.4	0	1	0	0	0	1.98	1	1	unpregnancy			2
FET	0	2021-04-19 10:12:00	0	31.4	31	18.13	1	1	0	0	0	2.25	1	1	clinical pregnancy	36	2500/2400	2
FET	0	2022-03-31 10:16:00	0	31.4	30	17.97	1	1	0	0	0	8.97	4	1	unpregnancy			2
FET	0	2022-06-26 11:17:00	0	31.4	36	23.88	0	3	1	0	0	9.32	1	2	clinical pregnancy	35+4	2900	2
FET	0	2021-01-26 10:28:00	0	31.4	34	20.43	0	1	0	0	0	2.44	1	1	unpregnancy			2
FET	0	2020-01-03 15:28:00	0	31.4	36	17.44	1	1	0	0	0	1.4	3	2	Biochemical pregnancy			1
FET	0	2020-09-21 15:14:00	0	31.4	34	17.58	1	1	0	0	0		1	1	clinical pregnancy	38+2	2450	2
FET	0	2022-05-14 10:39:00	0	31.4	29	18.42	1	2	1	0	0	4.41	1	1	clinical pregnancy	40+1	3600	1
FET	0	2020-04-14 10:32:00	0	31.4	35	26.3	2	1	0	0	0		4	2	unpregnancy			2
FET	0	2022-04-29 11:21:00	0	31.4	32	21.01	0	3	0	0	0		1	2	clinical pregnancy	39+6	3031	1
FET	0	2020-07-14 14:03:00	0	31.4	32	23.73	0	8	0	0	1		3	1	Biochemical pregnancy			1
FET	0	2021-08-24 09:05:00	0	31.4	30	21.48	0	1	0	0	0	1.48	1	1	clinical pregnancy			2
FET	0	2021-10-12 10:16:00	0	31.4	33	20.44	0	3	1	0	0	1.71	1	2	unpregnancy			1
FET	0	2022-03-10 10:22:00	0	31.4	30	26.84	2	1	0	0	0	0.76	1	1	clinical pregnancy	40+5	3500	2
FET	0	2020-05-29 11:25:00	0	31.4	31	24.84	2	3	1	0	0		1	1	Biochemical pregnancy			2
FET	0	2021-05-28 10:19:00	0	31.4	33	21.56	0	1	0	0	0		3	2	clinical pregnancy	39+3	3550	1
FET	0	2021-06-30 09:08:00	0	31.4	31	21.72	0	3	0	0	0	3.37	1	1	Biochemical pregnancy			2
FET	0	2021-07-06 08:39:00	0	31.4	34	17.22	1	4	1	0	0	6.04	1	1	Biochemical pregnancy			2
FET	0	2022-03-22 08:30:00	0	31.4	32	27.34	2	1	0	0	0	2.03	3	1	clinical pregnancy	36+6	3350	2
FET	0	2021-06-28 10:04:00	0	31.4	32	22.03	0	5	0	0	0	10.66	1	1	clinical pregnancy	38+5	3050	2
FET	0	2022-01-19 10:33:00	0	31.4	35	18.73	0	2	1	0	0	4.36	1	2	clinical pregnancy	40+1	2950	1
FET	0	2021-11-01 10:29:00	0	31.4	32	30.48	2	1	1	0	0	0.61	1	1	unpregnancy			2
FET	0	2021-08-17 11:15:00	0	31.4	39	23.01	0	1	0	0	0		1	1	unpregnancy			2
FET	0	2022-06-08 11:03:00	0	31.4	34	16.18	1	1	0	0	1	2.24	1	2	Biochemical pregnancy			1
FET	1	2022-04-07 08:13:00	0	31.4	32	23.11	0	10	1	0	0	2.03	1	1	clinical pregnancy	39+2	2950	2
FET	1	2021-09-25 09:19:00	0	31.4	32	30.41	2	9	0	0	0	0.72	1	1	unpregnancy			2
FET	1	2021-10-04 14:40:00	0	31.4	29	25.48	2	1	0	0	0	1.37	3	1	clinical pregnancy	37+4	3840	2
FET	1	2021-07-22 08:22:00	0	31.4	32	23.83	0	1	0	0	1	3.46	3	2	clinical pregnancy	39+5	3780	1
FET	1	2022-04-28 08:20:00	0	31.4	35	21.77	0	1	0	0	0	1.3	1	1	clinical pregnancy	36+1	2500/2800	2
FET	1	2021-09-08 10:07:00	0	31.4	32	22.15	0	3	0	0	0	3.12	1	1	clinical pregnancy	39+2	3300	1
FET	1	2021-10-15 10:22:00	0	31.4	32	24.91	2	4	1	0	0		1	1	clinical pregnancy			2
FET	1	2020-09-08 11:42:00	0	31.4	32	25.4	2	1	0	0	0	1.93	1	1	unpregnancy			2
FET	1	2020-06-16 11:41:00	0	31.4	32	23.73	0	8	0	0	1		4	1	unpregnancy			1
FET	1	2022-05-09 11:05:00	0	31.4	34	16.18	1	1	0	0	1	2.24	1	2	unpregnancy			1
FET	1	2022-02-08 10:00:00	0	31.4	34	23.34	0	8	0	0	0	5.22	1	2	clinical pregnancy	39+5	4050	2
FET	1	2021-10-04 10:10:00	0	31.4	31	20.31	0	1	0	0	0	9.55	1	1	unpregnancy			1
FET	1	2021-03-02 11:36:00	0	31.4	35	24.03	2	5	0	0	0	3.38	1	1	unpregnancy			2
FET	1	2020-03-04 13:35:00	0	31.4	29	20.7	0	1	0	0	0	4.24	1	1	clinical pregnancy	40+1	3250	1
FET	1	2020-03-20 14:54:00	0	31.4	33	18.43	1	3	1	0	0	6.6	1	1	clinical pregnancy			2
FET	0	2021-08-18 10:47:00	0	31.5	32	22.58	0	5	0	0	0	4.17	1	1	unpregnancy			1
FET	0	2021-12-19 08:31:00	0	31.5	31	18.59	0	1	1	0	0	2.2	1	1	unpregnancy			1
FET	0	2021-05-25 14:17:00	0	31.5	32	18.07	1	3	0	0	0	5.13	1	1	Biochemical pregnancy			2
FET	0	2021-08-20 11:16:00	0	31.5	36	19.23	0	2	0	0	0	1.68	3	1	clinical pregnancy	39+1	3035	2
FET	0	2020-08-20 09:28:00	0	31.5	32	28.04	2	1	1	0	0	0.79	1	1	clinical pregnancy	28+1	1030	1
FET	0	2020-04-27 11:17:00	0	31.5	35	22.04	0	1	0	0	0		1	1	clinical pregnancy	40+1	3700	1
FET	0	2020-08-14 14:39:00	0	31.5	30	19.81	0	3	0	0	0		1	1	clinical pregnancy	39+1	3910	2
FET	0	2021-03-01 08:45:00	0	31.5	31	25.31	2	3	1	0	0	4.55	1	2	clinical pregnancy			1
FET	0	2021-06-01 13:49:00	0	31.5	34	21.63	0	6	1	0	0	2.88	2	1	unpregnancy			2
FET	0	2020-08-05 14:08:00	0	31.5	33	28.25	2	4	1	0	0	5.82	1	1	clinical pregnancy	41+2	3300	2
FET	0	2021-03-31 09:06:00	0	31.5	36	24.03	2	5	0	0	0	3.38	1	1	unpregnancy			2
FET	0	2021-10-29 11:31:00	0	31.5	32	18.42	1	1	0	0	0	2.14	1	1	clinical pregnancy			2
FET	0	2020-05-15 10:37:00	0	31.5	36	26.3	2	1	0	0	0		4	2	ectopic pregnancy			2
FET	0	2021-09-10 12:01:00	0	31.5	31	19.15	0	2	0	0	0	4.02	4	1	Biochemical pregnancy			2
FET	0	2021-11-19 13:35:00	0	31.5	33	20.03	0	1	0	0	0	1.94	1	1	clinical pregnancy	38+6	3500	2
FET	0	2021-11-18 08:35:00	0	31.5	37	19	0	3	0	0	0		1	1	clinical pregnancy	39+1	3150	1
FET	0	2021-12-21 11:18:00	0	31.5	33	17.48	1	2	0	0	0	1.43	1	2	clinical pregnancy	39+2	3640	2
FET	0	2021-08-10 11:06:00	0	31.5	34	17.22	1	4	1	0	0	6.04	1	1	clinical pregnancy	39+6	3500	2
FET	0	2020-07-06 11:08:00	0	31.5	34	19.49	0	1	0	0	1		4	2	clinical pregnancy	38+2	2900	1
FET	0	2022-04-19 08:40:00	0	31.5	33	18.8	0	3	0	0	0	2.06	1	1	clinical pregnancy	38+5	3430	1
FET	0	2021-11-28 10:19:00	0	31.5	35	22.86	0	3	0	0	0		1	1	Biochemical pregnancy			2
FET	0	2022-05-23 11:40:00	0	31.5	32	22.89	0	4	0	0	0	0.44	3	1	unpregnancy			1
FET	0	2021-03-19 09:12:00	0	31.5	37	25.39	2	2	1	0	0		1	1	clinical pregnancy	38+5	3200	2
FET	0	2021-04-15 08:35:00	0	31.5	34	19.98	0	5	1	0	0	2.49	1	1	unpregnancy			2
FET	1	2021-10-24 10:33:00	0	31.5	33	19.11	0	2	0	0	0	1.65	1	1	unpregnancy			2
FET	1	2020-09-02 14:31:00	0	31.5	32	19.03	0	4	1	0	0		1	1	clinical pregnancy	39	3600	2
FET	1	2021-08-18 09:46:00	0	31.5	31	19.07	0	7	1	0	0	3.56	1	1	clinical pregnancy	40+5	3580	2
FET	1	2021-02-10 08:50:00	0	31.5	34	21.88	0	5	1	0	0	5.1	1	1	clinical pregnancy	36+6	2550/SW	2
FET	1	2021-12-05 09:41:00	0	31.5	31	18.73	0	2	1	0	0	0.93	1	1	unpregnancy			2
FET	1	2021-12-14 14:19:00	0	31.5	32	17.9	1	3	0	0	1		1	1	unpregnancy			2
FET	1	2021-07-09 10:32:00	0	31.5	33	24.14	2	4	0	0	0	4.51	1	1	unpregnancy			2
FET	1	2021-10-20 11:24:00	0	31.5	30	19.53	0	1	0	0	0	0.72	4	1	clinical pregnancy	36+6	2614/2317	2
FET	1	2021-05-06 11:09:00	0	31.5	32	18.78	0	2	0	0	0	1.97	1	1	unpregnancy			2
FET	1	2020-03-27 10:22:00	0	31.5	36	21.63	0	1	0	0	0		1	1	clinical pregnancy	42	3930	2
FET	0	2021-04-22 14:24:00	0	31.6	34	25.24	2	3	0	0	0	0.43	1	1	unpregnancy			2
FET	0	2020-05-02 09:54:00	0	31.6	34	18.36	1	4	0	0	0		1	1	clinical pregnancy	40+1	3400	1
FET	0	2020-09-02 13:44:00	0	31.6	33	19.2	0	4	1	0	0	0.71	3/4	1	clinical pregnancy	41+1	4400	2
FET	0	2020-09-07 16:04:00	0	31.6	32	19.43	0	1	1	0	0	2.07	1	1	clinical pregnancy	39+5	4110	2
FET	0	2020-04-17 11:04:00	0	31.6	32	23.63	0	2	0	0	0	3.42	1	1	unpregnancy			2
FET	0	2020-05-08 10:51:00	0	31.6	36	20.03	0	1	0	0	0	5.47	1	2	Biochemical pregnancy			2
FET	0	2021-07-07 08:45:00	0	31.6	33	18.73	0	2	0	0	0		1	2	Biochemical pregnancy			2
FET	0	2021-05-03 09:59:00	0	31.6	31	19.13	0	4	0	0	0	2.55	1	1	unpregnancy			1
FET	0	2020-06-17 14:02:00	0	31.6	31	21.78	0	3	0	0	0		1	1	Biochemical pregnancy			2
FET	0	2021-09-18 14:40:00	0	31.6	32	22.58	0	5	0	0	0	4.17	1	1	clinical pregnancy			2
FET	0	2021-03-29 08:45:00	0	31.6	30	22.86	0	1	1	0	0	1.76	1	1	Biochemical pregnancy			2
FET	0	2022-01-20 10:25:00	0	31.6	32	19.43	0	7	1	0	0	2.61	1	1	clinical pregnancy	39+4	3500	1
FET	0	2020-05-10 08:26:00	0	31.6	30	21.36	0	2	0	0	0	4.17	1	1	clinical pregnancy			2
FET	0	2021-09-13 09:02:00	0	31.6	33	22.58	0	3	0	0	1	5.34	1	1	clinical pregnancy	28+5	670/540	2
FET	0	2021-12-31 11:11:00	0	31.6	32	18.73	0	2	1	0	0	0.93	1	1	clinical pregnancy	39+1	4004	1
FET	0	2022-06-10 11:16:00	0	31.6	37	17.35	1	4	0	0	0	8.11	3	1	clinical pregnancy	39+1	3250	2
FET	0	2020-10-12 13:41:00	0	31.6	36	19.63	0	1	0	0	0	1.42	3	1	unpregnancy			2
FET	0	2021-07-01 11:10:00	0	31.6	35	32.47	2	10	0	0	0	2.49	4	1	clinical pregnancy			2
FET	0	2020-06-10 14:44:00	0	31.6	31	21.21	0	3	0	0	0		1	1	Biochemical pregnancy			1
FET	0	2020-09-21 15:44:00	0	31.6	35	26.67	2	4	1	0	0		1	1	unpregnancy			1
FET	0	2021-02-01 14:22:00	0	31.6	39	24.61	2	1	0	0	0	6.35	4	2	Biochemical pregnancy			2
FET	1	2021-04-18 09:49:00	0	31.6	35	19.63	0	4	0	0	0	4	3	1	unpregnancy			1
FET	1	2021-10-06 13:55:00	0	31.6	28	22.6	0	1	0	0	0	1.96	3	1	unpregnancy			1
FET	1	2022-02-09 09:06:00	0	31.6	34	19.63	0	2	1	0	0	1.05	1	2	clinical pregnancy	39+1	3030	1
FET	1	2022-04-06 11:34:00	0	31.6	33	29.3	2	2	1	0	0	3.48	3	2	unpregnancy			1
FET	1	2022-02-07 14:23:00	0	31.6	36	21.26	0	3	0	0	0	4.31	1	1	clinical pregnancy	38+6	3700	2
FET	1	2022-03-22 14:23:00	0	31.6	39	21.72	0	4	1	0	0	0.53	1	1	Biochemical pregnancy			2
FET	1	2021-12-14 08:44:00	0	31.6	33	20.44	0	3	1	0	0	1.71	1	2	unpregnancy			1
FET	1	2021-10-01 11:26:00	0	31.6	32	21.72	0	3	0	0	0	3.37	1	1	Biochemical pregnancy			2
FET	0	2021-07-12 11:11:00	0	31.7	31	24.84	2	3	0	0	0	2.83	1	2	clinical pregnancy	37+6	3200	2
FET	0	2022-02-23 10:40:00	0	31.7	32	18.59	0	1	1	0	0	2.2	1	1	unpregnancy			2
FET	0	2021-01-30 09:30:00	0	31.7	32	18.82	0	2	1	0	0	2.24	1	1	Biochemical pregnancy			1
FET	0	2020-07-06 09:35:00	0	31.7	38	20.08	0	6	1	0	0	2.82	1	1	unpregnancy			2
FET	0	2021-05-24 14:18:00	0	31.7	34	25.24	2	3	0	0	0	0.43	1	1	clinical pregnancy	38+3	3150	2
FET	0	2021-11-02 10:08:00	0	31.7	28	22.6	0	1	0	0	0	1.96	3	1	unpregnancy			1
FET	0	2020-04-23 11:23:00	0	31.7	34	19.72	0	4	0	0	0		1	1	unpregnancy			1
FET	0	2021-05-19 09:46:00	0	31.7	36	16.53	1	4	0	0	0		1	1	Biochemical pregnancy			2
FET	0	2022-05-23 14:00:00	0	31.7	32	21.05	0	5	0	0	0		1	1	unpregnancy			2
FET	0	2020-07-16 11:19:00	0	31.7	36	21.64	0	1	0	0	0	6.27	1	1	clinical pregnancy	37+3	2600/2600	2
FET	0	2021-11-15 08:54:00	0	31.7	32	23.83	0	1	0	0	0	2.68	1	1	clinical pregnancy	37+2	2500/2850	2
FET	0	2021-07-12 11:27:00	0	31.7	34	25.72	2	6	0	0	0		1	1	clinical pregnancy	38+6	3150	2
FET	0	2020-07-24 14:09:00	0	31.7	31	21.78	0	3	0	0	0		1	1	clinical pregnancy	39+6	4050	2
FET	0	2022-02-15 08:53:00	0	31.7	32	20.2	0	6	0	0	0	25.64	1	1	clinical pregnancy	39+5	3600	2
FET	0	2022-01-18 08:54:00	0	31.7	32	20.2	0	6	0	0	0	25.64	1	1	unpregnancy			1
FET	0	2020-07-10 11:32:00	0	31.7	41	22.58	0	1	0	0	1	3.16	4	1	unpregnancy			2
FET	0	2020-07-21 14:54:00	0	31.7	33	18.43	1	3	0	0	0	6.6	1	1	Biochemical pregnancy			2
FET	0	2021-12-01 13:40:00	0	31.7	35	25.15	2	5	0	0	0	5.21	1	1	clinical pregnancy	37+6	3100/3200	2
FET	0	2021-12-14 10:38:00	0	31.7	32	24.31	2	1	0	0	0		1	1	clinical pregnancy			1
FET	0	2021-07-23 10:02:00	0	31.7	34	21.63	0	6	1	0	0	2.88	1/3	1	unpregnancy			2
FET	0	2021-12-28 10:41:00	0	31.7	28	24.8	2	4	0	0	0	6.21	1	1	clinical pregnancy			2
FET	0	2022-06-21 09:51:00	0	31.7	33	15.07	1	2	1	0	0	4.95	1	1	unpregnancy			1
FET	0	2022-06-24 11:59:00	0	31.7	33	19.56	0	6	0	0	0	3.96	1	1	clinical pregnancy			2
FET	0	2021-12-23 09:57:00	0	31.7	32	19.56	0	1	0	0	0	3.05	1	2	clinical pregnancy	40	3400	1
FET	0	2020-06-19 14:13:00	0	31.7	31	20.44	0	4	0	0	0		1	1	unpregnancy			1
FET	1	2021-03-23 09:06:00	0	31.7	38	26.04	2	1	1	0	0	2.63	3	2	clinical pregnancy	39+2	3510	1
FET	1	2021-08-13 11:12:00	0	31.7	33	18.73	0	1	0	0	0	1.33	3	2	clinical pregnancy	36+5	2720	1
FET	1	2021-01-29 10:39:00	0	31.7	35	21.23	0	1	0	0	0		1	1	unpregnancy			2
FET	1	2022-06-08 08:44:00	0	31.7	32	19.56	0	5	1	0	0	3.62	1	1	clinical pregnancy	28+3	2830	1
FET	1	2021-08-06 08:35:00	0	31.7	32	27.29	2	1	0	0	1	1.21	1	2	unpregnancy			1
FET	1	2021-05-15 09:02:00	0	31.7	32	25.48	2	2	0	0	0		1	2	clinical pregnancy	38+5	3700	1
FET	1	2022-05-17 10:49:00	0	31.7	43	19.31	0	5	0	0	0		3	2	Biochemical pregnancy			1
FET	0	2021-10-07 08:23:00	0	31.8	37	30.67	2	2	0	0	0	0.83	3	1	clinical pregnancy	38+5	3500	2
FET	0	2021-05-13 11:14:00	0	31.8	35	21.3	0	1	0	0	0	3.92	1	2	Biochemical pregnancy			1
FET	0	2021-06-12 08:58:00	0	31.8	32	18.36	1	5	1	0	0	2.51	1	1	unpregnancy			2
FET	0	2020-04-27 14:11:00	0	31.8	36	24.56	2	8	0	0	1		1	1	unpregnancy			2
FET	0	2021-01-21 13:55:00	0	31.8	46	22.27	0	5	0	0	0	6.11	3	2	unpregnancy			2
FET	0	2021-02-18 10:55:00	0	31.8	40	22.6	0	5	0	0	0	2.59	1	1	clinical pregnancy	40+2	3500	2
FET	0	2021-04-06 10:09:00	0	31.8	34	15.82	1	2	0	0	0	5.16	1	1	Biochemical pregnancy			2
FET	0	2021-06-01 10:58:00	0	31.8	31	22.86	0	1	1	0	0	1.76	1	1	unpregnancy			2
FET	0	2021-11-14 09:59:00	0	31.8	32	19.98	0	6	1	0	0	3.49	4	1	clinical pregnancy	41	3800	2
FET	0	2022-04-19 09:13:00	0	31.8	33	21.48	0	8	0	0	0	1.96	1	1	unpregnancy			2
FET	0	2021-08-28 09:10:00	0	31.8	35	22.27	0	4	0	0	0	2.77	1	1	unpregnancy			1
FET	0	2022-05-31 08:44:00	0	31.8	36	21.45	0	4	0	0	0		1	1	unpregnancy			2
FET	0	2020-05-04 15:33:00	0	31.8	36	17.44	1	1	0	0	0	1.4	3	2	Biochemical pregnancy			1
FET	0	2021-07-13 11:27:00	0	31.8	39	20.08	0	2	0	0	0	0.61	1	1	clinical pregnancy	37+2	2450/2500	2
FET	0	2021-09-23 10:02:00	0	31.8	35	21.63	0	6	1	0	0	2.88	3	1	clinical pregnancy	30+3	1700/1550	2
FET	0	2021-11-05 11:31:00	0	31.8	36	19.98	0	10	1	0	1	5.27	3	2	Biochemical pregnancy			1
FET	0	2022-01-20 14:43:00	0	31.8	31	19.57	0	1	1	0	0	1.05	1	1	clinical pregnancy	40+3	3250	1
FET	0	2020-10-06 14:14:00	0	31.8	32	20.94	0	2	0	0	0		1	1	clinical pregnancy	39+6	3220	2
FET	0	2020-09-02 14:04:00	0	31.8	36	17.63	1	4	1	0	0	9.36	1	1	clinical pregnancy	40+3	3700	2
FET	0	2022-02-23 11:43:00	0	31.8	33	17.97	1	2	0	0	0		1	1	unpregnancy			2
FET	0	2022-01-29 11:10:00	0	31.8	33	22.03	0	3	0	0	0	1.85	1	1	clinical pregnancy	41+3	3250	1
FET	0	2022-03-29 08:41:00	0	31.8	48	25.97	2	1	0	0	0	4.12	1	2	unpregnancy			2
FET	0	2022-04-19 09:47:00	0	31.8	42	21.09	0	2	0	0	0	3.73	1	1	clinical pregnancy			1
FET	1	2020-05-11 11:05:00	0	31.8	35	22.55	0	3	0	0	0		1	1	clinical pregnancy	38+6	3300	2
FET	1	2020-06-04 14:40:00	0	31.8	33	23.44	0	4	0	0	0	1.74	1	1	unpregnancy			1
FET	1	2020-09-09 14:19:00	0	31.8	34	19.98	0	1	0	0	0	4.18	1	2	clinical pregnancy	38+4	2650	1
FET	1	2022-06-12 11:16:00	0	31.8	34	22.31	0	2	0	0	0		4	2	unpregnancy			2
FET	1	2021-06-04 09:41:00	0	31.8	34	18.8	0	5	1	0	0	1.09	1	2	unpregnancy			1
FET	1	2021-12-16 08:10:00	0	31.8	31	23.44	0	13	1	0	0	7.34	1	2	Biochemical pregnancy			2
FET	1	2020-08-21 13:58:00	0	31.8	32	20.44	0	4	0	0	0		1	1	unpregnancy			2
FET	1	2021-06-22 09:01:00	0	31.8	35	19.63	0	4	0	0	0	4	3	1	clinical pregnancy	36+1	2300/2400	2
FET	1	2021-10-07 08:53:00	0	31.8	37	21.09	0	3	1	0	0	0.81	3	1	unpregnancy			1
FET	0	2021-07-28 13:43:00	0	31.9	36	22.31	0	2	0	0	0	2.29	1	1	clinical pregnancy	36+2	2330/2630	2
FET	0	2020-03-23 10:41:00	0	31.9	31	19.14	0	2	1	0	0		1	1	clinical pregnancy	40+5	4200	2
FET	0	2020-03-19 10:30:00	0	31.9	34	19.05	0	3	0	0	0	1.87	1	1	clinical pregnancy	40+3	4450	2
FET	0	2020-07-09 10:40:00	0	31.9	33	23.44	0	4	0	0	0	1.74	1	1	unpregnancy			1
FET	0	2021-06-27 11:49:00	0	31.9	35	20.83	0	10	0	0	0	2.64	1	1	unpregnancy			2
FET	0	2021-09-10 14:41:00	0	31.9	33	22.31	0	3	0	0	0	6.03	1	1	unpregnancy			2
FET	0	2021-05-17 14:27:00	0	31.9	32	18.18	1	5	0	0	0	2.45	1	1	clinical pregnancy	39+5	3200	2
FET	0	2020-07-17 14:32:00	0	31.9	35	20.03	0	3	0	0	0		4	1	clinical pregnancy	38+4	3600	1
FET	0	2021-05-11 08:33:00	0	31.9	43	36.89	2	3	0	0	0		1	2	unpregnancy			1
FET	0	2020-01-23 11:20:00	0	31.9	34	20.32	0	5	0	0	0	1.05	1	2	unpregnancy			2
FET	0	2020-08-25 15:49:00	0	31.9	32	20.55	0	4	1	0	0	2.34	1	1	unpregnancy			2
FET	0	2020-09-07 10:25:00	0	31.9	34	19.03	0	1	0	0	0	4.56	3	2	Biochemical pregnancy			1
FET	0	2021-07-27 13:47:00	0	31.9	31	25.31	2	3	0	0	0	4.55	1	2	clinical pregnancy	35+3	2610/2380	2
FET	0	2021-08-13 12:19:00	0	31.9	36	23.44	0	3	0	0	0		4	1	clinical pregnancy	39+1	4450/3400	2
FET	0	2022-03-20 10:38:00	0	31.9	30	21.48	0	1	0	0	0	1.48	1	1	unpregnancy			1
FET	0	2022-03-24 10:04:00	0	31.9	37	19.72	0	1	0	0	0	2.94	4	1	unpregnancy			1
FET	0	2021-07-23 09:22:00	0	31.9	40	22.19	0	2	0	0	0	1.04	1	2	clinical pregnancy	40+3	3230	2
FET	0	2021-12-08 13:42:00	0	31.9	34	18.73	0	2	0	0	0		1	1	HCGpositive			2
FET	0	2022-04-26 14:03:00	0	31.9	28	20.76	0	3	0	0	0	6.32	1	2	clinical pregnancy			2
FET	0	2021-02-07 09:24:00	0	31.9	36	20.32	0	2	1	0	0	2.14	1	1	clinical pregnancy	39+1	3050	1
FET	0	2020-07-21 14:11:00	0	31.9	32	23.63	0	3	0	0	0	3.42	1	1	clinical pregnancy	37+5	2500/2700	2
FET	0	2021-06-29 14:32:00	0	31.9	37	19.57	0	3	0	0	0	1.72	1	1	clinical pregnancy			2
FET	0	2022-06-15 10:41:00	0	31.9	32	21.48	0	1	0	0	0	3.02	1	1	unpregnancy			2
FET	0	2022-06-16 11:15:00	0	31.9	25	25.33	2	4	0	0	0		1	1	clinical pregnancy	38+4	3100	1
FET	0	2022-04-25 11:03:00	0	31.9	31	23.44	0	3	1	0	0		1	1	clinical pregnancy	40+3	3300	1
FET	0	2022-03-29 14:01:00	0	31.9	29	23.37	0	2	0	0	0	12.21	1	1	clinical pregnancy	37+4	2650	2
FET	1	2021-11-11 10:48:00	0	31.9	32	21.51	0	5	1	0	0	1.05	1	1	clinical pregnancy	39+3	3700	1
FET	1	2021-10-21 10:55:00	0	31.9	40	22.43	0	1	0	0	0		1	2	unpregnancy			2
FET	1	2020-08-31 14:55:00	0	31.9	31	20.83	0	5	0	0	1	3.62	3	1	Biochemical pregnancy			2
FET	1	2021-11-29 09:34:00	0	31.9	35	24.77	2	1	0	0	0	2.73	3	2	Biochemical pregnancy			1
FET	1	2021-04-02 15:09:00	0	31.9	35	21.23	0	1	0	0	0		1	1	clinical pregnancy	38+6	2330	1
FET	1	2021-06-03 10:38:00	0	31.9	32	19.57	0	3	1	0	0	12.82	4	2	ectopic pregnancy			2
FET	1	2020-09-08 11:47:00	0	31.9	38	20.08	0	6	1	0	0	2.82	1	1	Biochemical pregnancy			2
FET	1	2021-09-20 10:13:00	0	31.9	36	25.39	2	4	1	0	0	1.73	1	1	unpregnancy			2
FET	1	2020-07-20 14:08:00	0	31.9	34	19.72	0	4	0	0	0		1	1	clinical pregnancy	37+2	2600/2650	2
FET	1	2019-12-27 14:19:00	0	31.9	33	20.7	0	3	1	0	1	3.63	1	2	clinical pregnancy	27+2	1000	1
FET	0	2021-09-28 08:16:00	0	32	31	22.06	0	6	0	0	0	3.51	1	1	unpregnancy			1
FET	0	2020-07-08 14:46:00	0	32	38	26.35	2	1	1	0	0	0.54	3	1	Biochemical pregnancy			2
FET	0	2020-07-10 10:51:00	0	32	30	19.56	0	1	0	0	0	0.88	3	1	unpregnancy			1
FET	0	2020-07-18 10:51:00	0	32	40	20.7	0	4	0	0	0	3.91	1	1	clinical pregnancy	40+3	3800	2
FET	0	2022-06-03 12:05:00	0	32	37	19.57	0	5	0	0	0	1.71	1	1	clinical pregnancy	38+4	3350	1
FET	0	2020-09-25 14:06:00	0	32	32	20.55	0	4	1	0	0	2.34	1	1	clinical pregnancy	39+5	3690	2
FET	0	2021-06-02 09:48:00	0	32	43	25.78	2	3	0	0	0		1	2	unpregnancy			1
FET	0	2020-03-20 10:50:00	0	32	33	18.07	1	2	0	0	0		1	2	clinical pregnancy			2
FET	0	2020-04-15 11:04:00	0	32	34	20.44	0	1	0	0	0	4.46	3	2	clinical pregnancy	37+6	2700	1
FET	0	2020-09-17 14:02:00	0	32	31	20.31	0	2	0	0	0	4	3	2	Biochemical pregnancy			1
FET	0	2021-03-19 10:48:00	0	32	36	21.33	0	9	0	0	0	3.21	1	1	unpregnancy			2
FET	0	2021-05-30 08:54:00	0	32	31	22.89	0	5	0	0	0	0.34	3	2	unpregnancy			1
FET	0	2022-04-15 10:36:00	0	32	31	20.31	0	1	1	0	0	0.93	3	1	clinical pregnancy	39+4	3130	1
FET	0	2022-01-14 11:27:00	0	32	33	16.22	1	2	0	0	0	5.22	1	1	unpregnancy			2
FET	0	2022-06-10 13:31:00	0	32	32	17.9	1	1	0	0	1		1	1	unpregnancy			2
FET	0	2021-12-15 08:09:00	0	32	37	21.09	0	3	1	0	1	0.81	3	1	clinical pregnancy			1
FET	0	2021-05-25 09:20:00	0	32	33	17.63	1	8	0	0	1	0.96	1	1	unpregnancy			2
FET	0	2021-03-22 11:55:00	0	32	34	20	0	4	1	0	0	5.62	1	2	clinical pregnancy			2
FET	0	2022-05-23 11:05:00	0	32	33	17.26	1	2	0	0	0	4.08	1	2	Biochemical pregnancy			2
FET	0	2021-10-19 10:23:00	0	32	36	25.39	2	4	1	0	0	1.73	1	1	clinical pregnancy	40+2	2652	2
FET	0	2021-06-01 10:52:00	0	32	35	17.12	1	8	1	0	0		1	1	clinical pregnancy	38+4	2480	2
FET	0	2022-02-25 10:47:00	0	32	33	17.48	1	3	0	0	0		1	1	clinical pregnancy	39+1	2900	2
FET	0	2022-03-09 10:53:00	0	32	32	18.31	1	2	1	0	0	3.23	3	1	clinical pregnancy	38+5	3250	1
FET	1	2022-04-06 14:07:00	0	32	37	18.49	1	3	0	0	0	1.12	1	2	Biochemical pregnancy			1
FET	1	2021-08-24 10:17:00	0	32	30	20.7	0	3	0	0	0	7.5	1	1	unpregnancy			1
FET	1	2021-06-02 10:50:00	0	32	34	18.18	1	1	0	0	0	0.73	4	1	unpregnancy			2
FET	1	2020-07-10 10:15:00	0	32	36	17.44	1	1	0	0	0	1.4	3	2	Biochemical pregnancy			1
FET	1	2019-12-31 10:39:00	0	32	32	23.62	0	5	0	0	0	2.66	1	1	Biochemical pregnancy			2
FET	1	2021-12-17 11:28:00	0	32	33	16.22	1	2	0	0	0	5.22	1	1	unpregnancy			2
FET	1	2021-05-11 09:09:00	0	32	31	25.81	2	2	0	0	0	3.67	1	1	clinical pregnancy	37+1	3100/2820	2
FET	1	2021-05-11 10:35:00	0	32	34	25.64	2	8	0	0	1	1.03	4	1	clinical pregnancy	39+6	3300	2
FET	1	2021-11-02 13:53:00	0	32	32	26.17	2	4	0	0	0	3.26	1	1	unpregnancy			2
FET	1	2022-05-24 09:01:00	0	32	32	24.91	2	4	0	0	0		1	1	clinical pregnancy			2
FET	0	2020-11-19 11:32:00	0	32.1	38	20.08	0	6	1	0	0	2.82	1	1	clinical pregnancy			2
FET	0	2021-12-16 10:34:00	0	32.1	34	16.41	1	1	0	0	0	9.24	1	1	clinical pregnancy			1
FET	0	2020-09-11 14:33:00	0	32.1	33	23.44	0	4	0	0	0	1.74	1	1	clinical pregnancy	39+5	4400	2
FET	0	2020-03-06 10:54:00	0	32.1	40	18.03	1	7	0	0	0	1.77	1	1	unpregnancy			2
FET	0	2020-09-21 13:52:00	0	32.1	29	23.11	0	2	0	0	0	3.16	1	1	unpregnancy			2
FET	0	2021-05-20 10:34:00	0	32.1	32	21.37	0	3	0	0	0		1	2	clinical pregnancy	39+5	3100	1
FET	0	2021-06-09 09:09:00	0	32.1	42	20.57	0	1	1	0	0		1	1	Intrauterine and extrauterine pregnancy			2
FET	0	2021-05-05 10:12:00	0	32.1	36	25.71	2	1	0	0	0	1.91	3	2	unpregnancy			1
FET	0	2021-05-29 10:50:00	0	32.1	36	24.22	2	4	1	0	0	1.47	1	2	Biochemical pregnancy			1
FET	0	2020-05-03 08:51:00	0	32.1	36	20.2	0	2	0	0	1	6.4	3	1	unpregnancy			2
FET	0	2020-08-11 11:42:00	0	32.1	34	18.36	1	3	1	0	0		1	1	clinical pregnancy	39+1	3310	1
FET	0	2020-06-09 13:35:00	0	32.1	32	20.44	0	3	0	0	0		1	1	Biochemical pregnancy			1
FET	0	2020-10-05 14:04:00	0	32.1	34	18.49	1	4	1	0	0	2.58	1	1	clinical pregnancy	38+4	3950	2
FET	0	2020-01-15 10:39:00	0	32.1	34	20.96	0	1	0	0	0	3.86	1	1	clinical pregnancy			2
FET	0	2020-08-10 14:39:00	0	32.1	34	23.51	0	1	0	0	1	9.69	1	1	clinical pregnancy	40+1	3600	2
FET	0	2022-02-25 10:30:00	0	32.1	32	20.89	0	2	1	0	0	2.28	1	1	unpregnancy			2
FET	0	2021-12-21 11:29:00	0	32.1	35	22.67	0	2	0	0	0		1	1	unpregnancy			1
FET	0	2021-12-17 11:55:00	0	32.1	36	22.95	0	3	0	0	0		1	2	clinical pregnancy	39+5	4190	1
FET	0	2021-06-05 11:04:00	0	32.1	31	19.14	0	3	0	0	0	7.37	1	2	clinical pregnancy	40+1	3220	1
FET	0	2021-02-19 14:37:00	0	32.1	30	19.11	0	4	0	0	0		1	1	clinical pregnancy	40+4	3750	2
FET	1	2020-07-31 14:50:00	0	32.1	33	22.48	0	1	0	0	0		1	1	unpregnancy			2
FET	1	2021-11-16 11:24:00	0	32.1	33	22.31	0	3	0	0	0	6.03	1	1	unpregnancy			1
FET	1	2022-02-10 09:29:00	0	32.1	33	24.14	2	4	0	0	0	4.51	1	1	clinical pregnancy	37+1	3500	2
FET	1	2021-01-12 08:30:00	0	32.1	35	23.15	0	4	1	0	0	2.11	4	2	clinical pregnancy	36+5	2800	2
FET	1	2020-03-17 10:14:00	0	32.1	35	24.78	2	4	1	0	0	0.62	3/4	1	clinical pregnancy	38+2	3900	2
FET	0	2020-01-04 10:18:00	0	32.2	32	23.12	0	2	1	0	0	2.51	1	1	unpregnancy			2
FET	0	2020-04-04 10:48:00	0	32.2	36	17.94	1	4	0	0	0		1	1	clinical pregnancy	40+3	3120	2
FET	0	2021-06-15 08:57:00	0	32.2	45	19.98	0	10	1	0	0	3.85	1	1	Biochemical pregnancy			2
FET	0	2021-07-30 11:22:00	0	32.2	34	22.06	0	1	0	0	0	6.11	1	1	unpregnancy			1
FET	0	2021-06-28 11:47:00	0	32.2	33	17.15	1	3	0	0	0	5.29	1	1	clinical pregnancy	39+2	3300	2
FET	0	2022-05-01 10:00:00	0	32.2	32	21.72	0	1	0	0	0	1.55	4	1	Biochemical pregnancy			1
FET	0	2021-12-12 08:46:00	0	32.2	32	19.13	0	4	0	0	0	2.55	3	1	clinical pregnancy	37+3	2700/2200	2
FET	0	2021-08-12 14:44:00	0	32.2	34	20.08	0	3	0	0	0	3.91	1	2	clinical pregnancy			1
FET	0	2021-02-09 08:45:00	0	32.2	34	26.06	2	1	0	0	0	5.34	3	2	clinical pregnancy	38+2	2650	1
FET	0	2021-10-01 09:11:00	0	32.2	34	20.2	0	2	0	0	0		3	1	Biochemical pregnancy			2
FET	0	2021-07-08 09:32:00	0	32.2	32	20.4	0	1	0	0	0	1.98	1	1	unpregnancy			2
FET	0	2021-06-03 10:58:00	0	32.2	36	25.71	2	1	0	0	0	1.91	3	2	unpregnancy			1
FET	0	2021-06-29 10:37:00	0	32.2	36	24.22	2	4	1	0	0	1.47	1	2	clinical pregnancy			1
FET	0	2021-10-15 13:57:00	0	32.2	37	19.57	0	3	0	0	0	1.72	1	1	unpregnancy			2
FET	0	2021-07-29 10:01:00	0	32.2	32	20.45	0	5	0	0	0	5.15	1	2	unpregnancy			1
FET	0	2022-01-28 11:46:00	0	32.2	32	18.07	1	3	0	0	0	5.13	1	1	clinical pregnancy	39+6	3530	2
FET	0	2022-05-03 10:49:00	0	32.2	33	20.31	0	3	1	0	0	4.51	1	1	clinical pregnancy			1
FET	0	2021-05-25 08:32:00	0	32.2	34	23.07	0	7	0	0	1	0.81	3	2	unpregnancy			1
FET	1	2020-09-11 14:07:00	0	32.2	30	19.56	0	1	0	0	0	0.88	3	1	clinical pregnancy	33+5	2800	2
FET	1	2021-05-19 09:58:00	0	32.2	46	22.27	0	5	0	0	1	6.11	3	2	clinical pregnancy	38+1	3050/2800	2
FET	1	2021-01-19 11:03:00	0	32.2	32	19.53	0	2	0	0	0		4	1	unpregnancy			1
FET	1	2021-10-20 10:00:00	0	32.2	36	18.83	0	1	0	0	0	1.14	3	1	unpregnancy			1
FET	1	2021-11-03 09:29:00	0	32.2	34	18.8	0	5	1	0	0	1.09	1	2	Biochemical pregnancy			2
FET	1	2022-03-23 10:13:00	0	32.2	31	22.35	0	1	0	0	0	2.63	1	1	clinical pregnancy			2
FET	1	2022-03-25 13:46:00	0	32.2	32	20.89	0	2	1	0	0	2.28	1	1	clinical pregnancy	39	3600	1
FET	1	2021-03-09 11:15:00	0	32.2	34	21.45	0	3	1	0	0	10.8	1	1	clinical pregnancy	39+4	3400	2
FET	1	2021-11-16 11:33:00	0	32.2	37	22.68	0	1	0	0	0	1.53	3	1	clinical pregnancy	38+1	3150	2
FET	1	2022-01-11 08:55:00	0	32.2	32	20.28	0	4	0	0	1	0.52	4	1	clinical pregnancy			2
FET	1	2021-07-09 10:33:00	0	32.2	41	21.45	0	1	0	0	0	3.15	3	2	unpregnancy			1
FET	0	2020-06-12 14:21:00	0	32.3	38	19.53	0	3	0	0	0		1	1	clinical pregnancy	41+2	3750	2
FET	0	2021-01-04 14:16:00	0	32.3	37	21.78	0	6	0	0	0		1	1	clinical pregnancy	32+6	2150	1
FET	0	2020-07-17 11:51:00	0	32.3	34	28.04	2	2	1	0	0	3.82	1	2	clinical pregnancy	34+1	1600/2350	2
FET	0	2021-10-29 10:46:00	0	32.3	34	19.31	0	3	1	0	0	8.62	1	1	clinical pregnancy	38+6	3030	2
FET	0	2021-08-14 08:34:00	0	32.3	33	25	2	1	1	0	0	3.15	1	2	clinical pregnancy			2
FET	0	2021-07-23 10:35:00	0	32.3	34	21.72	0	2	0	0	0	4.64	4	1	unpregnancy			1
FET	0	2021-10-01 10:55:00	0	32.3	34	19.81	0	2	0	0	0	0.96	3	2	unpregnancy			2
FET	0	2021-11-01 11:12:00	0	32.3	34	22.19	0	1	0	0	1	2.07	3	2	unpregnancy			1
FET	0	2022-06-01 11:00:00	0	32.3	33	22.58	0	5	0	0	0	4.17	1	1	clinical pregnancy	38+4	3600	2
FET	0	2021-02-04 10:19:00	0	32.3	30	28.73	2	1	0	0	0	2.38	1	1	unpregnancy			2
FET	0	2022-01-07 15:55:00	0	32.3	35	18.73	0	1	0	0	0	3.06	1	1	clinical pregnancy	40+4	3600	2
FET	0	2022-03-25 09:29:00	0	32.3	40	24.44	2	1	0	0	0	1.36	4	1	clinical pregnancy	39+2	3950	2
FET	0	2021-11-21 10:16:00	0	32.3	36	18.83	0	1	0	0	0	1.14	3	1	clinical pregnancy	37+3	3300	1
FET	0	2020-05-19 14:53:00	0	32.3	34	21.48	0	9	0	0	0	3.27	1	1	unpregnancy			2
FET	0	2021-03-02 14:49:00	0	32.3	34	18.43	1	3	0	0	0	6.6	1	1	unpregnancy			2
FET	0	2021-05-04 11:29:00	0	32.3	32	23.44	0	1	0	0	0	1.44	1	1	unpregnancy			2
FET	0	2022-02-20 11:27:00	0	32.3	37	17.31	1	2	0	0	0	5.6	1	1	clinical pregnancy	38+4	2500	2
FET	0	2022-03-08 11:06:00	0	32.3	32	23.34	0	3	0	0	0		1	1	clinical pregnancy	39+4	3350	2
FET	0	2020-09-29 11:16:00	0	32.3	31	16.16	1	1	0	0	1	5.18	3	1	unpregnancy			2
FET	0	2021-08-11 11:07:00	0	32.3	41	21.45	0	1	0	0	1	3.15	3	2	unpregnancy			1
FET	0	2020-07-24 14:13:00	0	32.3	36	22.27	0	1	0	0	0	2.64	1	1	clinical pregnancy	39+2	3100	2
FET	0	2022-01-24 11:45:00	0	32.3	30	21.64	0	5	1	0	1	2.26	1	1	Biochemical pregnancy			2
FET	0	2022-05-17 11:05:00	0	32.3	26	19.13	0	2	1	0	0	1.09	1	1	unpregnancy			2
FET	0	2021-11-09 09:11:00	0	32.3	32	27.28	2	5	1	0	0	2.18	1	1	clinical pregnancy	38+4	4600	2
FET	1	2021-12-15 09:10:00	0	32.3	37	19.57	0	3	0	0	0	1.72	1	1	unpregnancy			2
FET	1	2021-07-23 11:58:00	0	32.3	39	19.98	0	2	1	0	0	3.4	1	1	clinical pregnancy	41+6	2510	2
FET	1	2021-10-21 08:25:00	0	32.3	35	23.31	0	2	1	0	0	1.41	3	2	clinical pregnancy			2
FET	1	2021-09-19 10:14:00	0	32.3	31	22.89	0	5	0	0	0	0.34	3	2	clinical pregnancy	36+4	2200/2250	2
FET	1	2022-04-15 11:29:00	0	32.3	32	19.84	0	4	1	0	0	4.86	1	1	clinical pregnancy			2
FET	1	2021-01-20 11:06:00	0	32.3	33	20.89	0	3	0	0	0	5.09	1	1	unpregnancy			2
FET	1	2020-11-06 08:38:00	0	32.3	36	23.05	0	1	0	0	0	1.89	1	1	clinical pregnancy	37+1	3000	2
FET	1	2021-11-03 10:47:00	0	32.3	32	18.73	0	2	1	0	0	5.75	1/4	1/2	unpregnancy			2
FET	0	2021-07-13 10:03:00	0	32.4	33	24.44	2	5	0	0	0	5.09	1	1	unpregnancy			1
FET	0	2021-11-15 09:17:00	0	32.4	38	20.94	0	7	1	0	1	5	1	2	clinical pregnancy	38+3	3150	1
FET	0	2020-06-15 15:10:00	0	32.4	37	21.37	0	3	0	0	0		1	1	clinical pregnancy	37+1	2650/2950	2
FET	0	2022-05-12 14:16:00	0	32.4	44	18.67	0	8	0	0	0	1.71	3	1	clinical pregnancy	28+5	1000	1
FET	0	2021-06-06 08:38:00	0	32.4	38	21.79	0	2	1	0	0	6.43	1	1	unpregnancy			1
FET	0	2021-04-24 10:05:00	0	32.4	31	20.43	0	6	1	0	0	1.7	1	1	clinical pregnancy	39+3	2400	2
FET	0	2020-07-06 08:13:00	0	32.4	30	19.95	0	1	1	0	0		1	1	clinical pregnancy	36+6	2300/2800	2
FET	0	2021-03-26 09:22:00	0	32.4	33	23.12	0	1	1	0	0	2.79	1	1	clinical pregnancy	37+6	3670	2
FET	0	2021-10-03 09:36:00	0	32.4	36	24.22	2	4	0	0	0	1.47	1	2	clinical pregnancy	40+2	3100	2
FET	0	2021-10-26 08:55:00	0	32.4	34	25.39	2	1	1	0	0		1	2	clinical pregnancy	41	3400	1
FET	0	2020-03-31 10:35:00	0	32.4	33	21.63	0	1	0	0	0		1	1	clinical pregnancy	38+4	3300	2
FET	0	2020-09-25 14:13:00	0	32.4	32	20.44	0	3	0	0	0		1	1	clinical pregnancy			1
FET	0	2020-10-02 11:10:00	0	32.4	31	22.86	0	1	0	0	0		1	2	clinical pregnancy	40+3	4100	2
FET	0	2021-05-08 10:26:00	0	32.4	36	18.03	1	1	0	0	0		1	1	unpregnancy			2
FET	0	2021-08-31 09:06:00	0	32.4	34	25.78	2	5	1	0	0	2.17	2	2	clinical pregnancy	40+1	3600	2
FET	0	2020-06-04 14:09:00	0	32.4	33	22.03	0	3	0	0	0	4.11	1	1	Biochemical pregnancy			2
FET	0	2021-07-26 15:36:00	0	32.4	31	25.1	2	2	0	0	0		1	1/2	clinical pregnancy	40+5	4100	2
FET	0	2021-10-01 10:46:00	0	32.4	36	22.23	0	3	0	0	0		1	1	clinical pregnancy			2
FET	0	2022-04-26 08:57:00	0	32.4	34	19.27	0	2	0	0	0		1	1	clinical pregnancy	39	2500	1
FET	0	2021-07-23 11:32:00	0	32.4	31	21.91	0	2	1	0	0	5.38	1	1	unpregnancy			1
FET	0	2021-08-16 09:14:00	0	32.4	36	25.71	2	1	0	0	0	1.91	3	2	clinical pregnancy	36+2	2950	1
FET	0	2020-10-16 14:10:00	0	32.4	36	23.73	0	1	0	0	0	0.47	4	2	clinical pregnancy	38+3	3000	2
FET	0	2021-03-29 10:46:00	0	32.4	33	22.58	0	2	0	0	0	2.3	1	1	Biochemical pregnancy			2
FET	0	2022-02-17 14:21:00	0	32.4	37	16.53	1	4	0	0	0		1	1	unpregnancy			2
FET	0	2020-10-13 10:25:00	0	32.4	33	20.81	0	1	0	0	0	4.36	1	1	Biochemical pregnancy			1
FET	0	2021-02-01 10:45:00	0	32.4	36	16.02	1	3	0	0	0		1	1	Biochemical pregnancy			2
FET	0	2021-05-25 10:48:00	0	32.4	37	16.63	1	1	0	0	0		2	1	clinical pregnancy			2
FET	0	2022-05-04 10:02:00	0	32.4	33	19.92	0	6	1	0	0	3.17	1	1	clinical pregnancy	40	3770	1
FET	0	2021-10-19 09:49:00	0	32.4	33	26.04	2	5	1	0	0	6.69	1/4	2	clinical pregnancy	39+4	3300	2
FET	0	2021-05-31 09:25:00	0	32.4	39	32.05	2	5	1	0	0		1	1	unpregnancy			1
FET	0	2020-08-14 14:55:00	0	32.4	37	20.2	0	2	0	0	1	6.4	3	1	unpregnancy			2
FET	0	2022-05-03 13:51:00	0	32.4	35	21.91	0	1	0	0	0	3.1	1	1	clinical pregnancy	27+6	1050/950	2
FET	1	2020-07-24 11:46:00	0	32.4	33	18.31	1	4	0	0	1	0.95	1	1	Biochemical pregnancy			2
FET	1	2021-12-07 08:41:00	0	32.4	33	19.57	0	3	0	0	0	12.82	4	2	clinical pregnancy	34+5	2350/2200	2
FET	1	2021-11-26 09:18:00	0	32.4	34	25.71	2	4	0	0	0	0.95	1	1	unpregnancy			1
FET	1	2021-10-01 12:01:00	0	32.4	34	22.06	0	1	0	0	0	6.11	1	1	HCGpositive			2
FET	1	2022-05-06 08:26:00	0	32.4	34	18.73	0	2	0	0	0		1	2	clinical pregnancy	39+1	3200	2
FET	1	2020-11-16 08:56:00	0	32.4	35	23.73	0	1	0	0	0	5.81	1	1	Biochemical pregnancy			2
FET	1	2021-06-17 10:28:00	0	32.4	33	20.44	0	4	0	0	0	4.96	1	1	Biochemical pregnancy			2
FET	1	2022-03-28 08:33:00	0	32.4	34	19.27	0	2	1	0	0		1	1	unpregnancy			1
FET	1	2022-05-17 10:30:00	0	32.4	37	26.56	2	3	0	0	0	13.34	4	1	clinical pregnancy	39+5	3700	1
FET	1	2021-12-03 10:25:00	0	32.4	34	19.81	0	2	0	0	0	0.96	3	2	unpregnancy			1
FET	0	2021-03-23 13:54:00	0	32.5	37	21.93	0	5	0	0	0		1	1	unpregnancy			2
FET	0	2020-04-24 13:43:00	0	32.5	32	20.4	0	2	0	0	0		1	1	unpregnancy			2
FET	0	2020-10-23 08:32:00	0	32.5	45	20.7	0	1	0	0	1	0.73	3	1	unpregnancy			2
FET	0	2021-08-26 14:30:00	0	32.5	32	24.98	2	2	1	0	0	6.06	1	1	unpregnancy			2
FET	0	2020-05-05 10:58:00	0	32.5	35	24.46	2	1	0	0	0	3.71	4	2	Biochemical pregnancy			2
FET	0	2021-04-23 08:41:00	0	32.5	35	22.31	0	7	1	0	0	5.4	4	2	clinical pregnancy	37+6	2700/2700	2
FET	0	2020-08-19 14:51:00	0	32.5	35	20.32	0	5	0	0	0	0.43	3	2	clinical pregnancy	37+1	3150	1
FET	0	2021-08-21 09:58:00	0	32.5	35	18.83	0	6	1	0	0	1.41	4	1	clinical pregnancy	40+2	3000	2
FET	0	2021-09-24 08:11:00	0	32.5	34	23.07	0	7	0	0	1	0.81	3/4	2	unpregnancy			2
FET	0	2021-12-12 10:15:00	0	32.5	36	20.32	0	7	0	0	0		1	1	clinical pregnancy	39+4	3700	2
FET	0	2021-07-06 09:47:00	0	32.5	33	23.44	0	1	0	0	0	1.44	4	1	Biochemical pregnancy			2
FET	0	2021-09-26 10:29:00	0	32.5	34	19.11	0	1	0	0	0	4.59	1	1	unpregnancy			2
FET	0	2022-01-13 10:27:00	0	32.5	35	22.19	0	1	0	0	1	2.07	3	2	unpregnancy			1
FET	0	2022-06-10 10:56:00	0	32.5	35	21.94	0	2	1	0	0	3.97	1	1	unpregnancy			1
FET	0	2021-06-26 10:39:00	0	32.5	32	20.96	0	2	0	0	0	4.46	1	1	clinical pregnancy	39+3	3790	1
FET	0	2021-02-10 08:35:00	0	32.5	31	21.26	0	7	1	0	0	2.7	1	1	clinical pregnancy			2
FET	0	2022-04-06 08:35:00	0	32.5	31	21.64	0	5	1	0	1	2.26	1	1	clinical pregnancy	41+5	3600	2
FET	0	2020-04-20 15:59:00	0	32.5	34	22.27	0	1	0	0	0		1	1	Biochemical pregnancy			2
FET	0	2022-06-10 14:22:00	0	32.5	36	18.83	0	4	0	0	0	1.88	1	1	Biochemical pregnancy			1
FET	1	2021-03-23 10:22:00	0	32.5	32	20.31	0	2	0	0	0	4	3	2	clinical pregnancy			1
FET	1	2021-05-17 14:13:00	0	32.5	34	19.56	0	1	0	0	0	1.49	3	2	unpregnancy			1
FET	1	2019-12-30 09:55:00	0	32.5	32	17.58	1	2	1	0	0	2.5	1	1	unpregnancy			2
FET	1	2021-07-13 11:38:00	0	32.5	35	18.83	0	4	1	0	0	4.07	1	1	clinical pregnancy	38+6	2800	2
FET	1	2022-06-12 11:07:00	0	32.5	39	21.17	0	8	1	0	0	2.88	1	2	unpregnancy			2
FET	0	2021-07-15 09:20:00	0	32.6	38	18.31	1	4	0	0	0		1	1/2	unpregnancy			2
FET	0	2021-10-01 13:44:00	0	32.6	31	20.55	0	3	0	0	0		1	1	HCGpositive			2
FET	0	2022-06-24 15:45:00	0	32.6	32	21.22	0	4	1	0	0	2.11	1	1	clinical pregnancy	41+1	3700	2
FET	0	2020-06-05 11:42:00	0	32.6	34	24.03	2	3	0	0	0	3.33	1	1	clinical pregnancy	38+2	3400	2
FET	0	2020-04-07 10:37:00	0	32.6	28	21.1	0	3	0	0	0		1	1	clinical pregnancy	38+2	3000	2
FET	0	2020-07-13 13:57:00	0	32.6	38	20.81	0	1	0	0	0		2	1	clinical pregnancy	40+3	3350	1
FET	0	2021-03-12 09:44:00	0	32.6	34	20.57	0	1	0	0	0	3.05	1	1	unpregnancy			2
FET	0	2021-04-06 10:57:00	0	32.6	32	19.49	0	2	0	0	0	2.54	1	1	clinical pregnancy	38+6	3400	1
FET	0	2021-05-06 10:48:00	0	32.6	33	17.69	1	5	0	0	0	3.55	4	1	Biochemical pregnancy			1
FET	0	2021-10-22 10:26:00	0	32.6	34	22.77	0	2	0	0	0	4.71	2	1	clinical pregnancy	36+6	3000/3000	2
FET	0	2020-04-13 11:00:00	0	32.6	34	29.94	2	4	0	0	0	2.19	1	1	unpregnancy			1
FET	0	2021-06-08 10:17:00	0	32.6	34	21.45	0	3	1	0	0	6.15	1	1	clinical pregnancy			2
FET	0	2021-10-18 08:41:00	0	32.6	34	19.11	0	1	0	0	0	4.59	1	1	clinical pregnancy	37	2650/2400	2
FET	0	2021-05-17 10:57:00	0	32.6	31	26.48	2	2	0	0	0	4.55	3	2	clinical pregnancy	37+5	3050	1
FET	0	2021-09-09 08:58:00	0	32.6	35	28.76	2	10	0	0	0	3.85	1	1	unpregnancy			2
FET	0	2022-01-06 09:16:00	0	32.6	42	22.31	0	6	0	0	0	0.4	2	1	unpregnancy			1
FET	0	2022-06-17 09:26:00	0	32.6	39	21.64	0	1	0	0	0	4	1	1	unpregnancy			2
FET	0	2021-04-06 14:37:00	0	32.6	36	21.09	0	9	0	0	1	5.81	1	1	clinical pregnancy	31+6	1485	2
FET	0	2021-04-23 10:22:00	0	32.6	35	17.42	1	3	1	0	0	6.12	1	2	clinical pregnancy			2
FET	0	2020-08-11 11:06:00	0	32.6	33	22.03	0	3	0	0	0	4.11	1	1	Biochemical pregnancy			2
FET	0	2021-06-08 09:52:00	0	32.6	42	21.64	0	1	0	0	0	3.94	3	2	Biochemical pregnancy			1
FET	0	2021-08-01 10:50:00	0	32.6	33	21.77	0	1	0	0	1	2.98	3	2	unpregnancy			1
FET	0	2021-06-22 08:27:00	0	32.6	34	19.91	0	3	0	0	0	7.42	1	2	clinical pregnancy	38+5	3300	2
FET	0	2021-07-01 10:08:00	0	32.6	33	24.3	2	2	0	0	1	2.08	3	1	unpregnancy			1
FET	0	2022-02-08 08:31:00	0	32.6	33	27.94	2	5	1	0	0		3/4	2	Biochemical pregnancy			2
FET	1	2021-05-30 08:43:00	0	32.6	33	20.89	0	3	0	0	0	5.09	1	1	clinical pregnancy	38+6	3450	2
FET	1	2021-05-02 08:57:00	0	32.6	31	21.36	0	1	0	0	0	4.17	1	1	clinical pregnancy	38+6	3700	1
FET	1	2022-05-08 09:30:00	0	32.6	33	16.82	1	4	1	0	0	0.25	3	1	clinical pregnancy	39+2	3580	1
FET	1	2022-04-14 10:23:00	0	32.6	33	20.17	0	7	1	0	0	0.9	4	1	clinical pregnancy	38+4	3500	2
FET	1	2020-08-21 14:16:00	0	32.6	32	18.75	0	7	1	0	0	1.27	1/4	2	Biochemical pregnancy			2
FET	1	2021-08-25 10:12:00	0	32.6	33	20.44	0	4	0	0	0	4.96	1	1	Biochemical pregnancy			2
FET	1	2022-04-08 11:06:00	0	32.6	34	20.76	0	3	1	0	0		4	1	clinical pregnancy			1
FET	1	2022-05-01 08:51:00	0	32.6	37	16.53	1	4	0	0	0		1	1	clinical pregnancy	39+4	3500	1
FET	1	2020-04-17 16:00:00	0	32.6	39	28.89	2	4	0	0	0		1	1	clinical pregnancy			1
FET	0	2020-03-30 10:56:00	0	32.7	35	24.16	2	1	1	0	1		1	1	clinical pregnancy	40+1	3300	1
FET	0	2021-07-09 11:19:00	0	32.7	32	23.51	0	5	1	0	0	2.25	1	1	clinical pregnancy			2
FET	0	2021-07-14 09:50:00	0	32.7	33	21.63	0	2	0	0	0		1	1	clinical pregnancy	39+1	3450	1
FET	0	2020-08-31 15:53:00	0	32.7	28	19.72	0	1	0	0	0	1.95	1	1	clinical pregnancy	38+3	4000	1
FET	0	2020-10-02 11:47:00	0	32.7	31	21.48	0	2	0	0	0		1	2	clinical pregnancy	41	3810	2
FET	0	2020-08-28 13:56:00	0	32.7	32	19.48	0	5	1	0	0	4.79	1	2	unpregnancy			1
FET	0	2021-05-05 09:38:00	0	32.7	35	23.23	0	1	0	0	0		1	2	clinical pregnancy	29+2	1620	1
FET	0	2021-08-04 11:09:00	0	32.7	33	24.3	2	2	0	0	1	2.08	3	1	unpregnancy			2
FET	0	2021-04-30 10:48:00	0	32.7	42	19.83	0	7	0	0	0	1	1	1	Biochemical pregnancy			2
FET	0	2022-01-02 08:37:00	0	32.7	34	23.83	0	5	1	0	0	4.22	1	2	clinical pregnancy	37+6	2570/2210	2
FET	0	2022-05-19 08:43:00	0	32.7	33	18	1	2	1	0	0	3.01	1	1	clinical pregnancy	40+4	3500	1
FET	0	2020-06-02 11:30:00	0	32.7	33	26.84	2	6	1	0	0	5.34	1	1	unpregnancy			2
FET	0	2022-01-02 09:13:00	0	32.7	46	19.98	0	10	1	0	0	3.28	3	2	unpregnancy			1
FET	0	2021-03-19 10:37:00	0	32.7	34	24.22	2	1	0	0	0	7.38	1	1	clinical pregnancy			2
FET	0	2021-12-14 13:34:00	0	32.7	30	19.14	0	1	0	0	0	1.36	1	1	unpregnancy			1
FET	0	2022-03-14 09:19:00	0	32.7	34	23.44	0	1	0	0	0	3.18	3	1	clinical pregnancy	38+6	3600	1
FET	0	2022-06-08 09:02:00	0	32.7	33	21.88	0	3	0	0	0		1	1	unpregnancy			1
FET	0	2019-12-31 13:41:00	0	32.7	35	32.15	2	3	0	0	0		1	1	clinical pregnancy	40+4	3900	1
FET	0	2021-02-26 09:39:00	0	32.7	33	16.73	1	6	1	0	0	1.8	1	1	unpregnancy			2
FET	0	2021-07-15 10:29:00	0	32.7	40	21.19	0	2	0	0	0	2.6	3	1	clinical pregnancy	40+4	3750	2
FET	0	2022-04-08 09:03:00	0	32.7	33	20.28	0	7	0	0	0		1	1	unpregnancy			1
FET	0	2021-11-16 12:10:00	0	32.7	30	19.14	0	1	0	0	0	1.36	1	1	unpregnancy			2
FET	0	2021-07-26 15:26:00	0	32.7	32	22.94	0	6	1	0	0	3.97	1	2	clinical pregnancy			2
FET	0	2022-06-10 10:53:00	0	32.7	37	22.27	0	9	0	0	0		1	1	clinical pregnancy	38+2	3000	2
FET	0	2021-07-05 15:31:00	0	32.7	35	19.05	0	3	0	0	1		1	1	Biochemical pregnancy			2
FET	0	2022-03-23 13:55:00	0	32.7	37	20.96	0	7	1	0	0	2.58	1	2	clinical pregnancy	40+1	3400	1
FET	0	2022-03-07 09:22:00	0	32.7	33	22.04	0	1	0	0	0		2	1	clinical pregnancy			2
FET	1	2020-05-20 11:11:00	0	32.7	37	20.7	0	3	1	0	0	1.17	3	1	Biochemical pregnancy			1
FET	1	2021-12-03 08:58:00	0	32.7	32	25.64	2	3	1	0	0	1.32	1	2	Biochemical pregnancy			2
FET	1	2021-10-05 11:48:00	0	32.7	36	20.03	0	1	0	0	0	4.86	1	1	clinical pregnancy	38+2	3200	1
FET	1	2022-03-25 11:13:00	0	32.7	33	18.82	0	3	0	0	0	2.08	1	2	Biochemical pregnancy			1
FET	1	2021-11-15 08:15:00	0	32.7	30	24.46	2	2	0	0	0	5.68	4	2	clinical pregnancy			2
FET	1	2021-11-10 10:50:00	0	32.7	32	23.73	0	3	1	0	0	2.51	1	1	clinical pregnancy	32+1	1400	2
FET	1	2022-01-19 10:18:00	0	32.7	32	20.45	0	5	0	0	0	5.15	1/4	2	unpregnancy			2
FET	1	2022-03-23 09:09:00	0	32.7	34	20.2	0	2	0	0	1		3	1	unpregnancy			2
FET	0	2020-07-07 14:35:00	0	32.8	34	19.81	0	2	1	0	0	5.3	1	1	clinical pregnancy	39+5	3300	2
FET	0	2020-10-07 10:57:00	0	32.8	38	23.19	0	3	0	0	0		1	1	unpregnancy			2
FET	0	2021-01-11 08:28:00	0	32.8	32	21.36	0	7	1	0	0	1.68	1	2	Biochemical pregnancy			1
FET	0	2022-01-30 10:50:00	0	32.8	48	19.57	0	11	1	0	0	4.46	1	2	clinical pregnancy	39+2	3150	1
FET	0	2020-04-27 11:25:00	0	32.8	34	20.7	0	4	1	0	0	3.97	1	2	clinical pregnancy	39+3	3400	1
FET	0	2021-08-20 11:51:00	0	32.8	37	19.88	0	3	0	0	0		1	2	unpregnancy			1
FET	0	2020-08-17 14:46:00	0	32.8	35	20.7	0	2	0	0	0	1.43	1	1	unpregnancy			1
FET	0	2021-01-22 10:47:00	0	32.8	34	22.68	0	1	0	0	0	2.99	1	1	Biochemical pregnancy			2
FET	0	2021-01-26 11:59:00	0	32.8	33	23.11	0	5	1	0	0	1.21	1/4	2	unpregnancy			2
FET	0	2021-02-02 09:57:00	0	32.8	35	20.03	0	1	0	0	0	1.83	4	1	unpregnancy			2
FET	0	2021-10-27 10:33:00	0	32.8	34	26.17	2	7	1	0	0	0.72	3	1	clinical pregnancy	41	4200	1
FET	0	2021-12-19 09:10:00	0	32.8	37	20.03	0	2	0	0	0	2.67	3	2	unpregnancy			1
FET	0	2020-06-26 12:44:00	0	32.8	36	24.44	2	2	0	0	0	2.3	1	1	clinical pregnancy	36	2500/2600	2
FET	0	2021-07-15 13:50:00	0	32.8	37	20.83	0	3	1	0	0	2.17	1	1	clinical pregnancy	40+4	3350	2
FET	0	2021-07-16 10:22:00	0	32.8	30	28.73	2	1	0	0	0	2.38	1	1	unpregnancy			2
FET	0	2020-08-25 15:35:00	0	32.8	36	19.88	0	3	0	0	0	1.36	1	1	HCGpositive			1
FET	0	2021-01-14 09:51:00	0	32.8	39	21.05	0	5	1	0	0	1.4	1	1	clinical pregnancy	40+5	4230	2
FET	0	2021-04-20 09:00:00	0	32.8	34	19.88	0	2	0	0	1		1	1	unpregnancy			2
FET	0	2020-04-06 11:20:00	0	32.8	30	20.69	0	3	1	0	0		1	1	clinical pregnancy	40+5	3651	1
FET	0	2022-01-18 14:11:00	0	32.8	34	22.72	0	12	0	0	0	2.6	1	1	clinical pregnancy			2
FET	0	2022-01-13 14:02:00	0	32.8	38	22.55	0	6	0	0	0	5.86	1	1	Biochemical pregnancy			2
FET	0	2021-12-06 10:51:00	0	32.8	32	24.98	2	2	1	0	0	6.06	1	1	clinical pregnancy	37+6	3150	1
FET	0	2020-06-29 13:51:00	0	32.8	33	19.33	0	1	0	0	0	3.78	1	2	clinical pregnancy	39+1	3400	2
FET	0	2020-09-02 14:18:00	0	32.8	32	22.86	0	2	1	0	0	5.57	1	1	unpregnancy			2
FET	0	2021-05-25 11:09:00	0	32.8	35	22.86	0	3	0	0	0	2.15	1	1	unpregnancy			1
FET	0	2022-03-01 09:38:00	0	32.8	33	21.37	0	1	0	0	0	4.06	3	1	unpregnancy			1
FET	0	2021-02-02 14:47:00	0	32.8	35	18.87	0	1	0	0	0		1	1	clinical pregnancy	39+3	3504	2
FET	0	2021-10-14 10:53:00	0	32.8	37	16.63	1	1	0	0	0		2	1	unpregnancy			1
FET	0	2022-01-19 14:48:00	0	32.8	32	18.37	1	2	1	0	0	2.64	1	1	clinical pregnancy	40+2	3520	1
FET	0	2020-08-05 13:48:00	0	32.8	36	28.23	2	11	1	0	0	3.27	2	1	Biochemical pregnancy			2
FET	0	2022-06-05 09:41:00	0	32.8	33	20.28	0	7	0	0	0		1	1	unpregnancy			1
FET	0	2021-05-25 08:49:00	0	32.8	36	19.14	0	3	1	0	0	14.08	1	1	clinical pregnancy	38+4	3180	2
FET	0	2021-03-02 14:02:00	0	32.8	37	18.21	1	2	0	0	0		2	1	unpregnancy			2
FET	0	2022-04-17 09:24:00	0	32.8	43	22.31	0	6	0	0	0	0.4	4	1	unpregnancy			2
FET	1	2021-05-24 09:27:00	0	32.8	37	23.8	0	7	0	0	0		1	1	clinical pregnancy	39+4	3920	2
FET	1	2020-12-17 11:25:00	0	32.8	39	23.81	0	5	0	0	0	1.6	3	1	unpregnancy			2
FET	1	2021-08-26 09:00:00	0	32.8	43	21.64	0	1	0	0	0	3.94	3	2	unpregnancy			1
FET	1	2020-12-09 10:00:00	0	32.8	33	18.13	1	2	1	0	0	2.28	1	1	clinical pregnancy	41+1	3880	1
FET	1	2020-09-29 10:31:00	0	32.8	33	21.19	0	5	0	0	1	2.27	3	1	Biochemical pregnancy			1
FET	1	2021-07-26 10:58:00	0	32.8	37	19.83	0	2	0	0	0	1.4	1	1	Biochemical pregnancy			1
[truncated: 2,105 more rows]
